# Supplementary material for: Natural high-avidity T-cell receptor efficiently mediates regression of cancer/testis antigen 83 positive common solid cancers
Source: J Immunother Cancer. 2022 Jul 7;10(7):e004713. doi: 10.1136/jitc-2022-004713 (PMC9263944; doi:10.1136/jitc-2022-004713)
Supplement: Supplementary data [file jitc-2022-004713supp002.xlsx]

## Sheet: 224 CTA
224 CTAs: functional CTAs gene screeened from Genbank
Gene ID	Official Symbol
255313	CT47A11
100507170	CT47A12
728096	CT47A1
728090	CT47A2
728082	CT47A3
728075	CT47A4
728072	CT47A5
728062	CT47A6
728049	CT47A8
728042	CT47A9
728036	CT47A10
653282	CT47A7
643311	CT47B1
1485	CTAG1B
30848	CTAG2
728911	CT45A2
541466	CT45A1
441519	CT45A3
653067	XAGE1B
441521	CT45A5
541465	CT45A6
102723631	CT45A10
102723737	CT45A8
102723680	CT45A9
101060211	CT45A7
246100	CTAG1A
4102	MAGEA3
2703	GJA8
54967	CT55
64663	SPANXC
30014	SPANXA1
64648	SPANXD
653220	XAGE1A
4103	MAGEA4
728712	SPANXA2
1956	EGFR
51438	MAGEC2
6774	STAT3
7099	TLR4
2543	GAGE1
84519	ACRBP
727838	LOC727838
728695	SPANXB1
140690	CTCFL
90737	PAGE5
4100	MAGEA1
285782	CAGE1
10761	PLAC1
2263	FGFR2
57082	KNL1
256309	CCDC110
6757	SSX2
158511	CSAG1
64693	CTAGE1
170626	XAGE3
6756	SSX1
53340	SPA17
57119	EPPIN
4110	MAGEA11
9947	MAGEC1
55510	DDX43
10643	IGF2BP3
4111	MAGEA12
4101	MAGEA2
4105	MAGEA6
4108	MAGEA9
10566	AKAP3
84944	MAEL
4109	MAGEA10
102723547	CSAG2
4113	MAGEB2
203413	CT83
7272	TTK
2515	ADAM2
23532	PRAME
10765	KDM5B
170302	ARX
125972	CALR3
3598	IL13RA2
55872	PBK
80184	CEP290
146852	ODF4
4112	MAGEB1
574	BAGE
10134	BCAP31
55165	CEP55
7258	TSPY1
727837	SSX2B
9043	SPAG9
6406	SEMG1
4107	MAGEA8
55511	SAGE1
139081	MAGEC3
55124	PIWIL2
23671	TMEFF2
2579	GAGE7
6785	ELOVL4
9502	XAGE2
5620	PRM2
5619	PRM1
158809	MAGEB6
3597	IL13RA1
729447	GAGE2A
2577	GAGE5
2578	GAGE6
83540	NUF2
441525	SPANXN4
85318	BAGE3
3948	LDHC
11339	OIP5
347541	MAGEB5
100101629	GAGE8
2576	GAGE4
8852	AKAP4
29122	PRSS50
1496	CTNNA2
170627	XAGE5
494118	SPANXN1
85317	BAGE4
85316	BAGE5
80705	TSGA10
26256	CABYR
4957	ODF2
4956	ODF1
9125	CNOT9
676	BRDT
7180	CRISP2
84528	RHOXF2
445582	POTEE
139135	PASD1
84072	HORMAD1
6847	SYCP1
147945	NLRP4
56001	NXF2
89885	FATE1
168400	DDX53
83639	TEX101
56154	TEX15
9585	KIF20B
28986	MAGEH1
51270	TFDP3
54763	ROPN1
54742	LY6K
389903	CSAG3
6759	SSX4
23626	SPO11
6676	SPAG4
151871	DPPA2
93426	SYCE1
79925	SPEF2
56165	TDRD1
7179	TPTE
9703	KIAA0100
124912	SPACA3
54457	TAF7L
7718	ZNF165
8715	NOL4
84660	CCDC62
27136	MORC1
197257	LDHD
89765	RSPH1
146183	OTOA
27120	DKKL1
55105	GPATCH2
152404	IGSF11
56155	TEX14
11086	ADAM29
149998	LIPI
93273	LEMD1
474382	H2AB1
219938	SPATA19
10214	SSX3
266740	MAGEA2B
53940	FTHL17
25853	DCAF12
221400	TDRD6
133482	SLCO6A1
8577	TMEFF1
83853	ROPN1L
162517	FBXO39
150763	GPAT2
81569	ACTL8
4115	MAGEB4
83983	TSSK6
317754	POTED
548313	SSX4B
219681	ARMC3
125965	COX6B2
94086	HSPB9
26748	GAGE12I
80125	CCDC33
340441	POTEA
2574	GAGE2C
51213	LUZP4
158521	FMR1NB
66000	TMEM108
169966	TENT5D
339834	IHO1
113746	ODF3
51298	THEG
130576	LYPD6B
23784	POTEH
728343	NXF2B
728269	MAGEA9B
4114	MAGEB3
100996331	POTEB
339416	ANKRD45
139067	SPANXN3
53336	CPXCR1
404785	POTEG
494197	SPANXN5
494119	SPANXN2
645073	GAGE12G
645037	GAGE2B
166863	RBM46
221191	PRSS54
729408	GAGE2D
100008586	GAGE12F
283685	GOLGA6L2
286499	FAM133A
388468	POTEC
100289087	TSPY10
728137	TSPY3
26095	PTPN20A

## Sheet: 198 CTA GTEx
198 CTAs: with available expression data from GTEx
ENname	Gene	Adipose - Subcutaneous	Muscle - Skeletal	Artery - Tibial	Artery - Coronary	Heart - Atrial Appendage	Adipose - Visceral (Omentum)	Uterus	Vagina	Breast - Mammary Tissue	Skin - Not Sun Exposed (Suprapubic)	Minor Salivary Gland	Brain - Cortex	Adrenal Gland	Thyroid	Lung	Spleen	Pancreas	Esophagus - Muscularis	Esophagus - Mucosa	Esophagus - Gastroesophageal Junction	Stomach	Colon - Sigmoid	Small Intestine - Terminal Ileum	Colon - Transverse	Prostate	Testis	Nerve - Tibial	Skin - Sun Exposed (Lower leg)	Heart - Left Ventricle	Brain - Cerebellum	Cells - Cultured fibroblasts	Whole Blood	Artery - Aorta	Cells - EBV-transformed lymphocytes	Pituitary	Brain - Frontal Cortex (BA9)	Brain - Caudate (basal ganglia)	Brain - Nucleus accumbens (basal ganglia)	Brain - Putamen (basal ganglia)	Brain - Hypothalamus	Brain - Spinal cord (cervical c-1)	Brain - Hippocampus	Brain - Anterior cingulate cortex (BA24)	Ovary	Brain - Cerebellar Hemisphere	Liver	Brain - Substantia nigra	Kidney - Cortex
ENSG00000004848	ARX	0.0170411	6.83526	0.0267643	0.0280577	0.0151519	0.0255776	0.0506237	0.506295	0.205208	0.0508897	0.325013	9.57911	0.0879402	0.541141	0.548279	0.0787355	0.690321	0.0327493	0.0484515	0.036317	1.03005	0.049328	0.413915	0.18249	1.36154	9.72273	0.031376	0.0583601	0.00839958	0.0504903	0.0108828	0.0145404	0.0194049	0.0427809	0.753358	10.8047	7.01357	7.09927	5.92905	4.18745	0.0779073	4.28137	11.7589	135.716	0.0956431	0.0136037	0.611854	0.0353302
ENSG00000007202	KIAA0100	42.5051	36.0607	47.4075	46.642	20.8103	41.9441	56.5242	35.1224	41.6995	39.1419	30.9877	32.9326	45.9293	53.9745	52.7314	45.9408	18.1984	45.4503	37.807	44.2559	33.9412	46.6204	44.0312	38.9815	38.992	48.3786	52.2139	40.552	17.0734	51.6105	81.8207	16.2749	49.2102	67.2289	52.5829	32.4013	23.2951	24.5561	18.8742	25.0131	21.5944	20.0724	26.0567	55.2304	46.6496	15.099	21.4898	30.7803
ENSG00000008294	SPAG9	48.6407	43.662	54.0392	44.2193	19.9632	37.2992	54.0299	39.8549	39.0624	33.768	20.9353	34.63	21.8934	49.1791	58.2875	21.6535	13.9452	36.9162	20.8679	38.2847	20.9332	35.8524	26.1432	26.5278	26.7755	56.7598	87.0036	37.6297	11.0539	57.9022	50.2665	14.5443	48.1552	27.0918	34.3174	37.193	33.3179	30.4884	28.6411	37.0702	79.0975	35.5706	31.2333	53.6326	59.9693	10.7081	44.1299	18.108
ENSG00000046774	MAGEC2	0.0117296	0.014511	0.0108313	0.0135515	0.00680868	0.0239311	0.0184725	0.0192826	0.0167953	0.0122599	0.0108444	0.00709831	0.00963756	0.0254917	0.0118808	0.00955386	0.00691086	0.0169395	0.0246299	0.00814992	0.00987203	0.00895483	0.0120467	0.00848085	0.032931	45.4063	0.0193736	0.0164991	0.00572008	0.0171398	0.018801	0.0131446	0.0104262	0.0294773	0.0719063	0.0138472	0.0057261	0.00920782	0.00422151	0.00565965	0.00569019	0.0157893	0.0124476	0.0169345	0.0185882	0.0105159	0.00454511	0.00749341
ENSG00000054796	SPO11	0.00275979	0.00178513	0.00158288	0.00267462	0.00136741	0.00285549	0.00218739	0.00272731	0.00546972	0.00391305	0.00152284	0.00183924	0.00185992	0.0108542	0.00162046	0.00182788	0.00112186	0.00416352	0.0019525	0.00178323	0.00215226	0.00190483	0.00260989	0.00171542	0.0107622	12.4117	0.00441885	0.00382187	0.000680234	0.00295444	0.00459133	0.000978781	0.00111076	0.00273345	0.00292838	0.00368593	0.00348333	0.00277689	0.00306577	0.00265564	0.00208541	0.00278086	0.0040785	0.00279444	0.00175284	0.00275243	0.00338353	0.00228918
ENSG00000061656	SPAG4	1.84396	0.413042	2.08696	3.64667	2.55681	4.87462	5.57867	4.99747	3.93698	1.03421	8.39682	3.32958	5.65224	4.33165	6.3467	16.5484	22.168	3.00059	2.66819	3.09439	5.90823	4.15428	9.22578	8.08919	7.67562	74.4193	2.77582	0.894356	1.50412	1.06779	8.99449	1.41098	3.97399	12.1059	17.9451	3.07743	1.13765	1.05887	1.02244	3.45608	1.41541	1.23479	2.00185	19.325	0.937422	2.54906	1.67387	4.4541
ENSG00000064199	SPA17	0.693836	0.118666	1.48055	1.46413	0.450893	0.744181	1.22561	0.774904	1.09358	0.687535	0.850388	1.30012	0.87826	2.89102	2.2555	0.401057	0.466386	1.07305	0.880822	0.864465	0.754947	0.975754	0.711265	1.08445	1.17968	37.549	0.818989	0.6467	0.243865	0.477226	3.38227	0.140125	1.29459	1.10912	3.19202	1.61238	2.06849	1.96339	1.13228	2.74444	1.09597	1.70436	1.40622	0.521723	0.407919	0.186729	1.26317	1.42119
ENSG00000065371	ROPN1	0.0372112	0.0143189	0.0688134	0.106286	0.147372	0.0118669	0.0239322	0.0111378	1.21675	0.652994	0.893278	0.0793421	0.0102681	0.0362772	0.0164029	0.00816439	0.0074318	0.0306659	0.0115787	0.0132951	0.0123689	0.0627152	0.0196231	0.228253	0.0957357	83.5851	0.270639	0.576669	0.0437232	0.0237186	0.00980328	0.00292924	0.133079	0.00755751	0.114581	0.0927503	0.0682849	0.0771943	0.0410337	0.0891932	0.0696615	0.047998	0.0670291	0.0153585	0.0173125	0.0171702	0.0483596	0.0143252
ENSG00000066032	CTNNA2	0.0436289	0.050408	0.0384996	0.0926902	0.0898713	0.0816884	0.391986	0.584444	0.0628046	0.0547882	0.0535428	52.0539	0.55658	0.0960792	0.0472451	0.0104351	0.505559	0.768702	0.0393035	0.69082	0.37771	1.84298	0.682405	1.06419	0.271957	20.204	1.00437	0.0591946	0.0245213	10.0534	0.0183717	0.0209166	0.0276296	0.284996	7.08068	61.8812	32.3161	27.3072	20.9899	24.0102	7.42549	27.9464	46.3276	0.119328	12.7876	0.0189445	15.0321	0.0354747
ENSG00000066468	FGFR2	5.22768	0.0993325	14.0822	2.73653	1.46488	1.23012	46.364	24.6252	11.5094	38.5321	23.5948	23.6842	14.18	31.1664	9.06667	0.331081	8.54995	21.8712	14.6213	15.2691	7.10421	41.0912	7.84998	22.9207	20.2522	6.13869	4.95734	42.6448	0.113037	30.4714	0.0967296	0.0741935	4.68901	0.0510724	6.45455	21.638	24.205	18.3319	28.4975	19.3413	137.23	28.9297	16.9718	19.1259	17.9616	8.50553	42.3537	9.36446
ENSG00000080007	DDX43	2.36919	0.214609	2.77316	2.73885	0.917674	2.17815	1.38351	1.19952	2.2583	1.4365	1.66044	0.287374	0.779383	4.00558	2.68028	1.75419	1.12841	2.72972	1.07982	2.81421	2.07805	2.28924	1.79571	1.51153	2.22063	40.1195	3.64047	1.58176	0.306727	0.492248	0.68901	0.376343	3.43777	1.19639	1.10301	0.243139	0.298276	0.311084	0.251755	0.521249	1.60635	0.469563	0.241974	3.2519	0.464122	0.291142	0.818126	0.765613
ENSG00000092978	GPATCH2	4.00483	1.1797	4.44992	4.6853	1.9956	3.48472	5.28879	4.5242	4.73047	3.83015	3.33312	1.90602	2.80215	6.75549	4.17087	4.09768	1.5823	3.93358	3.2388	3.78697	2.57219	3.85714	3.31658	3.04205	5.8709	9.9386	6.41368	3.85546	1.19966	2.07108	4.87378	0.512179	4.16446	3.70778	5.39014	2.53313	1.76177	2.09748	1.39066	2.50698	2.24789	1.78038	2.02724	3.79043	2.53851	1.40877	1.56439	2.53236
ENSG00000095627	TDRD1	0.10849	0.0492141	0.0566652	0.279589	0.161093	0.159972	0.126155	0.102856	0.339997	0.114883	0.165887	0.116394	0.069882	0.14465	0.0690314	0.507618	0.260617	0.0946846	0.124689	0.114292	0.152023	0.0916738	0.166671	0.140301	0.102533	14.7298	0.0954134	0.0685538	0.269967	0.0760208	0.127235	0.0107433	0.329806	0.224075	0.198177	0.163227	0.0785486	0.0527522	0.0741112	0.102109	0.0656496	0.0464984	0.0513514	0.454398	0.0494504	0.0720296	0.0908814	0.120875
ENSG00000099399	MAGEB2	0.0473109	0.0164817	0.0124687	0.0161627	0.00902807	0.0338208	0.0146092	0.0234729	0.0354463	0.0243862	0.0269138	0.0125749	0.0126636	0.030048	0.0200039	0.0214512	0.00755558	0.0410052	0.0138934	0.0384114	0.0180196	0.0202108	0.0350713	0.0140161	0.0436624	50.6852	0.0825045	0.0382013	0.0083633	0.0213719	0.00785075	0.014693	0.0107894	0.0337701	0.0186889	0.0170232	0.00897211	0.012041	0.0121964	0.00953506	0.0134559	0.0142695	0.00947665	0.104709	0.0153637	0.0102139	0.0224151	0.00777306
ENSG00000101448	EPPIN	0.0188167	0.0183434	0.0250818	0.0217728	0.0187408	0.28317	0.240274	0.130869	0.0755138	0.0885116	0.0525078	0.0743225	0.0127908	1.02299	0.662317	0.0120248	0.0110158	0.0359077	0.0184567	0.0169514	0.0197813	0.0635011	0.0410421	0.0339286	0.247863	132.531	0.0378756	0.0555608	0.00755916	0.0526151	0.0120011	0.00690591	0.0190834	0.0129946	0.0678012	0.0736288	0.0544815	0.0148766	0.0421503	0.0277326	0.024711	0.0222079	0.0418928	0.121085	0.052558	0.0271258	0.0193979	0.0639246
ENSG00000101746	NOL4	0.0701551	0.010071	0.785692	0.174275	0.103065	0.0380961	0.0499301	0.102078	0.116952	0.0705731	0.0728758	7.41909	0.19351	1.99701	0.0551244	0.0714183	0.368858	0.0371659	0.0273967	0.0418593	0.120604	0.130404	0.0874641	0.117638	0.362033	11.3623	0.074199	0.0827926	0.0344902	10.8615	0.00507113	0.00519753	0.210366	0.342856	10.9723	10.8778	4.10822	7.6862	3.03996	7.86177	1.61172	4.31083	8.18604	0.0426198	14.7816	0.483421	2.18891	0.137358
ENSG00000102021	LUZP4	0.00625326	0.00186707	0.013549	0.0126235	0.00461615	0.00481769	0.0230692	0.00754224	0.00674654	0.00453224	0.0019416	0.0127605	0.0258021	0.00661444	0.00426535	0.00372618	0.000583689	0.00555033	0.00119901	0.00375667	0.00253535	0.00589206	0.00467471	0.00556119	0.0141658	10.2206	0.017633	0.00262217	0.00124531	0.00467311	0.00546821	0.00081747	0.0131192	0.0128252	0.0516637	0.0127027	0.00699363	0.00916142	0.00642533	0.00960683	0.00888761	0.00699299	0.011133	0.00571094	0.00336707	0.00238572	0.0138091	0.00581988
ENSG00000102387	TAF7L	0.320649	0.0811003	0.141174	0.166967	0.108668	0.131676	0.672303	1.04433	0.278098	0.997194	0.202085	0.935839	0.119447	0.169692	0.153598	0.139105	0.0717276	0.102632	0.204974	0.0799436	0.116904	0.788188	0.237058	0.338936	0.935647	66.4383	0.520449	1.65111	0.0430467	0.06627	1.22779	0.0174175	0.514109	0.0630947	0.668715	0.965804	0.734075	1.95823	0.527703	0.372038	0.115065	0.937439	0.860426	0.203776	0.0561525	0.648877	0.234205	0.454846
ENSG00000103023	PRSS54	0.016808	0.0228803	0.0135491	0.013594	0.0136217	0.0133129	0.0215149	0.0175295	0.0574699	0.0285257	0.0158246	0.0896638	0.0210147	0.0379682	0.0324717	0.0098673	0.00994378	0.03833	0.0133421	0.0274601	0.0164983	0.0488282	0.0221822	0.0245424	0.0795223	68.1023	0.0360455	0.0258731	0.00798084	0.0801739	0.0146148	0.00512601	0.0141384	0.0120184	0.0737248	0.0995667	0.136404	0.122349	0.111544	0.101547	0.0755323	0.0952219	0.0852256	0.0221395	0.0768967	0.0106838	0.0836217	0.0164242
ENSG00000104147	OIP5	0.81145	6.07025	0.558211	0.751892	0.361543	0.698976	0.785046	2.47867	0.868958	2.48327	1.39182	0.348372	2.41299	0.653307	1.15509	2.55044	0.299221	0.472504	5.29764	0.486741	1.42231	0.679349	2.99161	2.78377	0.671795	40.3946	0.896276	2.18379	0.226246	0.743698	11.9434	0.792464	0.781182	30.5855	0.371895	0.38895	0.346233	0.347787	0.335652	0.35354	0.768679	0.372924	0.303592	1.84001	0.836353	0.870306	0.401606	0.426798
ENSG00000104755	ADAM2	0.00512657	0.00709497	0.00449054	0.00597492	0.00389154	0.00601591	0.00681008	0.00556558	0.0391785	0.0158392	0.00540961	0.00414502	0.0067304	0.0199244	0.0116074	0.0064828	0.00318329	0.0188216	0.0061279	0.00559334	0.00651263	0.00997185	0.0107531	0.00748249	0.134614	54.5723	0.00723114	0.00686917	0.00225394	0.0127676	0.00518578	0.00151488	0.00450039	0.0147474	0.00703852	0.0023625	0.00298392	0.00517859	0.00416102	0.0544781	0.00921937	0.0883077	0.00419937	0.00726633	0.00739795	0.00849863	0.00450691	0.011975
ENSG00000104901	DKKL1	0.318984	0.104416	0.300986	0.313282	0.152176	0.343417	0.920201	0.54308	0.706545	0.237639	0.262889	0.0894609	0.220874	0.324736	0.458797	0.23345	0.322454	0.728469	0.158047	0.595944	0.316639	0.65714	0.321806	0.367612	0.731097	480.498	0.482632	0.244509	0.0870235	0.1556	0.223804	0.0455117	0.329333	0.0604858	0.212694	0.0755283	0.089228	0.0905583	0.0433352	0.111065	0.118472	0.138292	0.105902	0.892585	0.0951327	0.127377	0.0521506	0.215051
ENSG00000105549	THEG	0.0449058	0.0197372	0.0316117	0.0130364	0.00704152	0.0126843	0.808846	0.132622	0.0892579	0.798837	0.025284	0.521257	0.0116558	0.523475	0.0302366	0.0121513	0.00874195	0.0267938	0.1245	0.0141549	0.0161055	0.0238398	0.0285356	0.0297468	0.297895	54.5722	0.0196021	0.848792	0.00643619	0.0191727	0.0422782	0.0160017	0.0138735	0.281636	0.028016	0.461316	0.015336	0.0393675	0.0127654	0.0301125	0.0151959	0.0229646	0.148293	0.0219967	0.0108253	0.0114538	0.00612399	0.00871982
ENSG00000111254	AKAP3	0.43657	0.423867	0.518813	0.689516	3.73147	0.537907	0.76078	0.750021	0.816966	0.797286	0.88057	0.912724	1.12288	1.5385	0.696998	0.735778	1.02672	0.779722	0.633923	0.730606	0.702298	0.69585	0.751041	0.617852	1.17338	181.787	1.19901	0.76499	0.614228	0.825914	0.745904	0.111609	0.49957	1.23512	2.18329	0.907459	0.985705	0.907287	0.911685	1.15078	2.96595	1.18222	0.792614	0.753035	0.722917	0.452276	1.71294	0.921265
ENSG00000111644	ACRBP	1.91694	0.389958	0.961892	2.2558	0.560323	2.41329	1.99026	2.21935	2.16931	1.75131	1.88545	0.652898	1.06762	11.676	7.28906	18.3216	1.43098	1.41798	1.11076	1.2725	1.98215	1.62088	5.27334	1.83885	4.46833	570.677	2.58449	1.45697	0.489262	6.98827	0.863438	13.8919	1.7908	1.96145	1.87653	0.44964	0.568301	0.568835	0.518491	0.666074	1.38313	0.588669	0.426312	1.63807	6.29826	1.34958	0.661363	1.50726
ENSG00000112742	TTK	0.337886	0.0366321	0.154891	0.366402	0.0995481	0.316826	0.253195	2.20873	0.443654	1.98538	0.982039	0.0814195	0.962183	0.424752	0.881691	1.88313	0.123998	0.145719	5.90929	0.125859	1.28242	0.253354	2.02117	1.78306	0.498041	29.2534	0.237515	1.91732	0.0920283	0.114901	16.5308	0.473226	0.258777	25.6493	0.126927	0.113339	0.0803115	0.0888574	0.059271	0.118133	0.139236	0.110287	0.0936711	0.304884	0.120724	0.230967	0.10667	0.227725
ENSG00000114487	MORC1	0.0178612	0.0028742	0.0067152	0.0135524	0.00303753	0.011364	0.0154861	0.0215243	0.0178462	0.00613966	0.0105948	0.0222241	0.0229664	0.0196218	0.0147196	0.0595876	0.00737871	0.00941002	0.00680294	0.0054964	0.0110728	0.00806684	0.0625141	0.0180341	0.0628938	17.4465	0.0311086	0.00600864	0.00161951	0.00967278	0.00259345	0.0085847	0.00987541	0.0319119	0.701895	0.0359419	0.0454266	0.0430262	0.0304238	0.12775	0.210981	0.319121	0.0364593	0.168157	0.0162832	0.0428376	0.124218	0.017855
ENSG00000117139	KDM5B	11.9163	2.64186	11.5213	10.4364	4.19434	10.5218	20.0347	21.9536	13.9479	27.8258	14.0675	5.85155	7.76304	13.6095	15.6713	9.35831	4.53772	10.6016	21.5498	10.787	8.75979	12.847	10.3064	11.3902	15.2977	105.756	13.3407	29.1853	2.29755	12.2128	24.6628	8.37245	11.7574	9.56249	9.86662	6.05524	4.3654	5.48431	3.5278	3.92341	3.67627	3.58384	5.00931	19.7729	13.3069	2.47963	2.48819	5.10053
ENSG00000117148	ACTL8	0.00620579	0.0064744	0.0168803	0.0101244	0.0067522	0.00662946	0.00868373	0.0181513	0.0105105	0.0174572	0.00983179	0.114238	0.00580081	0.00754156	0.00883228	0.0106631	0.00810134	0.00869225	0.059659	0.00818984	0.00752735	0.0247695	0.0304197	0.0965957	0.014979	16.7508	0.00653326	0.00866566	0.00304784	0.0133128	0.203367	0.00434948	0.0232992	0.056089	0.00655258	0.144527	0.00384008	0.0077143	0.00465724	0.0406635	0.0260901	0.0214501	0.0476341	0.201639	0.0124813	0.0119666	0.0165474	0.00797412
ENSG00000118402	ELOVL4	1.50088	0.187148	3.91945	3.56265	0.955743	0.980602	3.93325	7.97041	1.34159	68.6485	3.66982	11.7454	0.611079	2.1841	0.7277	0.583312	0.267439	2.65392	15.5988	2.74307	1.57438	3.71754	1.5619	2.15796	3.82726	9.35496	2.60947	72.96	0.245346	28.4333	8.93662	0.346469	5.35253	0.153524	13.572	23.7568	11.2346	12.556	9.24047	17.9511	7.00473	10.6401	13.8654	2.92694	43.6381	0.0934842	8.70614	0.991436
ENSG00000120289	MAGEB4	0.00625466	0.00311523	0.00143944	0.00363217	0.0017307	0.00402872	0.00785725	0.00803173	0.0336806	0.0102282	0.0120589	0.00387969	0.00215426	0.00612801	0.00177584	0.00144062	0.00243788	0.00926852	0.00317874	0.0067304	0.00399228	0.00429182	0.00774858	0.00411565	0.0212933	15.3182	0.00762721	0.00713093	0.00166567	0.00571345	0.00166353	0.00110394	0.00280398	0.0187775	0.00244883	0.00496574	0.00213316	0.000572423	0.00112024	0.00231916	0.00199792	0.00110426	0.00350534	0.00195761	0.0023253	0.00312792	0.000979784	0.00298141
ENSG00000121101	TEX14	0.282078	0.0888588	0.320059	0.310086	0.155368	0.354263	0.50032	0.242147	0.54159	0.27029	0.283196	0.36662	0.313302	0.204533	0.792332	0.65811	0.119984	0.284775	0.104802	0.297799	0.311335	0.442353	0.303327	0.278967	0.721453	40.5366	0.479847	0.263337	0.0990509	1.79178	2.10498	0.0682837	0.322415	0.496479	0.544427	0.343048	0.339392	0.305685	0.337592	0.512068	0.539917	0.491146	0.319889	0.799759	1.79464	0.217729	0.424508	0.114533
ENSG00000121634	GJA8	0.00464231	0.00491382	0.00684851	0.0058345	0.00377869	0.00987915	0.0204463	0.00573147	0.0107083	0.00860134	0.00508611	0.0096149	0.00761395	0.00795354	0.0104538	0.014807	0.00315832	0.00744264	0.00415398	0.00467588	0.0137553	0.00515212	0.00646278	0.00414421	0.0131278	12.3479	0.00764349	0.00748713	0.00273104	0.00993527	0.00553516	0.00246816	0.00693488	0.0074754	0.0165807	0.0104281	0.00723911	0.0106186	0.00636668	0.00943376	0.0241109	0.0120968	0.00957	0.0136623	0.00864414	0.0128816	0.0088464	0.0947243
ENSG00000122304	PRM2	2.74739	3.12709	1.53871	1.80381	0.718736	2.05649	2.47234	1.78864	12.8224	3.95245	1.84723	0.759528	1.90735	6.39693	1.70935	1.44473	1.21578	7.45036	1.73771	1.53277	1.9953	2.13837	4.49014	1.93819	15.2626	21637.7	1.99961	3.94551	0.711303	2.29908	1.39558	0.58212	2.01705	1.00591	2.36966	0.482534	0.390162	0.555474	0.487779	0.487134	0.315366	0.3633	0.504351	2.22848	0.990035	1.85789	0.414779	1.84012
ENSG00000123496	IL13RA2	0.601856	0.0700628	1.16472	1.67291	0.641573	1.40523	0.344866	0.504103	0.738563	0.310338	1.39727	0.672842	2.41575	1.86055	3.00332	0.276066	0.0924629	0.43648	1.07821	0.530061	0.304998	0.413104	0.520483	0.529923	4.42324	51.411	0.186393	0.42321	0.0993487	0.251893	37.2883	0.0517975	49.8449	0.0218164	20.3412	0.964482	3.47662	6.08095	1.85134	13.5293	0.501939	3.82434	1.32928	0.261967	0.231227	1.40685	1.37885	2.31255
ENSG00000123584	MAGEA9	0.00147624	0.00163969	0.0011683	0.00216996	0.00138625	0.00138309	0.00201211	0.00284538	0.00246532	0.00146924	0.000693457	0.00293945	0.000961047	0.00193458	0.00238472	0.00267502	0.000557409	0.00123927	0.00103204	0.00166886	0.00125549	0.00225405	0.0022092	0.00164478	0.00276424	1.43957	0.00230795	0.00183905	0.000688623	0.00266329	0.00112758	0.000759311	0.00112127	0.00420483	0.00243871	0.00261694	0.00234462	0.00214825	0.00141184	0.00339383	0.00107491	0.00179664	0.00240643	0.00303478	0.00450698	0.00122115	0.00143793	0.00115635
ENSG00000124092	CTCFL	0.0194882	0.0115365	0.00880374	0.00944968	0.00410204	0.0383854	0.0124885	0.0111837	0.0164393	0.00675501	0.0050468	0.00745641	0.00513466	0.0437037	0.0138873	0.0692443	0.00783117	0.0105309	0.00896834	0.00852883	0.0108833	0.0104495	0.0253875	0.0142176	0.0230406	8.00219	0.0209022	0.00875377	0.00398719	0.0232796	0.0117238	0.0146285	0.00812436	0.0420261	0.179075	0.00885433	0.00729885	0.0175558	0.00556344	0.0371624	0.00842151	0.00679314	0.00567246	0.017931	0.0211724	0.0429485	0.00816892	0.0412522
ENSG00000124233	SEMG1	0.0955975	0.0184713	0.0473089	0.0251917	0.0084038	0.105914	0.0258803	0.0297312	1.54614	0.116641	0.094989	0.0210369	0.0408979	0.0289299	0.0750354	0.121919	0.010056	0.225843	0.0464387	0.022693	0.0375306	0.0513231	0.111029	0.116804	379.579	0.115156	0.0196711	0.0281507	0.0103716	0.0195178	0.00541048	0.333172	0.0223801	0.0885501	0.0198808	0.012869	0.00248385	0.00338771	0.00304634	0.00444398	0.00803031	0.00567076	0.0140694	0.0492082	0.00395107	0.0222661	0.00346698	0.0497456
ENSG00000124260	MAGEA10	0.0191103	0.00155359	0.00530184	0.00542847	0.00288394	0.0143281	0.0113995	0.0882154	0.0182011	0.0545997	0.0153272	0.0036002	0.00176908	0.0338846	0.00430332	0.00556095	0.00397753	0.003533	0.0148993	0.00263271	0.00325183	0.00200217	0.0122638	0.00324708	0.0481106	4.16327	0.00711772	0.0381206	0.00119356	0.00311541	0.00308843	0.00155456	0.00555338	0.00168983	0.0103293	0.00308313	0.000883886	0.00223458	0.00101713	0.00994019	0.000900088	0.0024227	0.00440177	0.00835133	0.0019834	0.00207248	0.00248107	0.00532924
ENSG00000124490	CRISP2	0.207485	0.192919	0.0740198	0.0940122	0.0529048	0.164588	0.324654	2.98248	1.02073	0.686689	22.6125	0.0525976	0.117172	0.50823	1.74057	0.80481	0.441825	0.422952	4.67606	0.177174	0.133692	0.129974	0.543496	0.118087	2.26708	1089.66	0.103833	0.906004	0.0491963	0.128998	0.0771293	1.82241	0.117064	0.0543656	3.3816	0.0345778	0.112808	0.255733	0.120676	0.575212	0.0688829	0.0495788	0.0430001	0.322067	0.0509155	0.143678	0.124165	0.525888
ENSG00000126752	SSX1	0.0216373	0.0196026	0.018562	0.0148922	0.00777476	0.0329007	0.0209972	0.0192138	0.0179128	0.0196063	0.00892488	0.0104655	0.0136342	0.646445	0.0171802	0.00880149	0.00923173	0.0164861	0.0102123	0.0101043	0.0092385	0.0106395	0.0130899	0.00931229	0.0287552	16.2674	0.0303989	0.0236971	0.00800624	0.0310717	0.0127659	0.0212048	0.013461	0.0378568	0.0119622	0.015599	0.00929195	0.0128266	0.00609683	0.0114823	0.0107866	0.0109688	0.0120588	0.0163193	0.0317303	0.00776053	0.0111917	0.00556694
ENSG00000126890	CTAG2	0.405673	0.292557	0.342148	0.290842	0.298537	0.445088	0.448914	0.77263	0.471713	0.438771	0.185749	0.357109	0.67615	0.264574	0.399684	0.462295	0.118288	0.421082	0.691045	0.392543	0.486315	0.44842	0.246153	0.258389	0.501525	14.6813	0.446569	0.400102	0.338288	0.341379	1.02407	0.11101	0.428223	0.0122237	0.438847	0.255655	0.131926	0.201299	0.117085	0.286442	0.325619	0.236974	0.371119	0.754453	0.208693	0.312122	0.407563	0.172284
ENSG00000130783	CCDC62	0.43114	0.588439	0.232483	0.240225	0.148626	0.232445	0.31911	0.232597	0.36761	0.261568	0.249564	0.658942	0.149327	0.232704	0.261999	0.745952	0.111389	0.17783	0.120456	0.161244	0.149471	0.18407	0.357404	0.15281	0.363433	63.1011	0.703655	0.354703	0.0908996	1.21761	0.216645	0.226241	0.206362	0.236007	1.17324	0.680506	0.40856	0.566335	0.328923	0.484628	0.51196	0.462958	0.560852	0.266555	1.27404	0.0840549	0.362173	0.107176
ENSG00000131126	TEX101	0.0212978	0.0199041	0.0233956	0.0273432	0.015342	0.0249557	0.0598619	3.10724	0.100602	1.26903	1.07613	0.143403	0.0277824	0.0733965	0.0435074	0.0407993	0.0204794	0.0666411	3.30042	0.0344742	0.061469	0.0374545	0.0520918	0.20456	0.207651	230.132	0.0467333	1.10586	0.00873684	0.39081	0.0243302	0.0502308	0.0347071	0.0240682	0.0408734	0.143829	0.0870424	0.0881676	0.0810426	0.0619831	0.0674536	0.0675234	0.0892977	0.0449627	0.41853	0.0382592	0.0307447	0.0345906
ENSG00000131721	RHOXF2	0.0122734	0.00640032	0.0107666	0.0143084	0.00765665	0.0143962	0.0247299	0.0201954	0.0157625	0.0183526	0.0102103	0.0151541	0.0141871	0.0302176	0.0147119	0.0205926	0.00498317	0.0160856	0.0157781	0.0133749	0.00876136	0.0137791	0.017896	0.0158533	0.0221001	5.74056	0.0184664	0.0209536	0.00450128	0.0609392	0.00741606	0.00912209	0.0119503	0.0161892	0.0322381	0.0188311	0.0124091	0.016516	0.00867954	0.0201978	0.0153155	0.0133716	0.0145432	0.0568942	0.0600069	0.00728001	0.011709	0.013174
ENSG00000131724	IL13RA1	80.5441	24.7734	90.2547	76.4741	19.1385	57.0006	57.6189	54.8099	63.4795	26.3903	56.3213	6.85907	40.3461	51.4016	74.0172	36.4866	14.8405	72.64	69.6414	67.8865	44.4278	53.2708	53.5701	52.6508	33.9732	21.0965	59.4632	31.1526	9.75896	3.80815	71.3617	51.3042	95.2333	2.77698	30.7804	8.63795	12.5724	9.70295	10.5338	16.8226	27.1305	11.4207	7.46668	60.0975	4.19351	50.2346	19.8018	27.2918
ENSG00000132446	FTHL17	0.0028008	0.00257223	0.00212866	0.00589712	0.00170709	0.00294458	0.00362451	0.00117776	0.0046556	0.0885956	0.00159821	0.00119671	0.00291271	0.0043464	0.00348682	0.00224448	0.00225085	0.00342023	0.00244142	0.00189613	0.00159838	0.00257547	0.00246422	0.00174209	0.0073458	8.76781	0.00470554	0.202972	0.001136	0.000893693	0.00460109	0.00277728	0.00244951	0.00388741	0.00110297	0.000859665	0.000288455	0.000634065	0.00109249	0.000908663	0.00236075	0.00170401	0.00244852	0.00962067	0.0017154	0.00132996	0.000723741	0.000524353
ENSG00000133863	TEX15	0.00717492	0.00470164	0.0068307	0.0174495	0.0151781	0.0104624	11.5169	0.085071	0.0165085	0.0154478	0.00825325	0.307184	0.0212878	0.0189499	0.0195634	0.221474	0.00387516	0.0654755	0.0395083	0.346335	0.819767	0.013858	0.0341595	0.0127174	0.0452946	17.9256	0.0218332	0.00998537	0.00368692	0.0651224	0.0677118	0.00337404	0.0135885	0.272849	1.29614	0.241806	0.660015	0.469912	0.466683	0.273344	0.169713	0.267911	0.2607	0.343533	0.0413075	0.0126645	0.158785	0.0106341
ENSG00000135951	TSGA10	1.33457	0.294571	0.557863	0.672733	0.382177	1.45745	1.09714	1.28736	1.79464	1.69567	2.10118	1.4187	1.32284	6.82608	2.34649	1.45841	1.35903	0.494166	1.06582	0.531325	1.13006	0.547567	1.42332	0.960558	2.46765	49.6846	1.53853	1.72824	0.141047	1.83052	1.46304	0.265489	0.556629	1.45083	5.94771	1.52709	1.93723	1.6959	1.05185	2.5058	2.80641	2.369	1.27388	1.54166	1.86165	0.436382	1.94576	2.35921
ENSG00000136231	IGF2BP3	0.156618	0.0142831	0.0368171	0.163298	0.0215314	0.167115	0.0414897	0.331322	0.090221	0.0342373	0.263443	0.0257478	0.0360865	0.31181	0.37436	0.1444	0.368225	0.0828694	1.91944	0.0806025	0.0888549	0.228147	0.19226	0.146854	0.072809	5.64455	0.376061	0.0553385	0.0123406	0.0329021	22.6204	0.151227	0.0761689	17.2473	0.0272463	0.0225842	0.0160407	0.0247697	0.0118462	0.053184	0.0729066	0.0467394	0.0376988	0.0799217	0.0280833	0.0296919	0.0296411	0.0336762
ENSG00000136811	ODF2	20.7056	5.03128	25.0302	22.3395	9.73864	19.3058	36.3794	24.4612	21.6268	16.8857	15.5752	11.2062	11.5414	24.3134	24.2323	26.5405	6.84258	23.4156	14.8133	22.861	15.5346	22.5896	19.2797	16.5993	27.6015	354.43	24.5102	17.0376	6.43273	44.1855	38.2585	7.0684	23.6954	39.1964	50.3787	10.1188	7.77629	7.1162	6.30082	10.9513	10.0755	7.73238	7.02148	25.3727	42.5385	8.78445	7.21506	10.2601
ENSG00000136869	TLR4	25.4268	2.70391	8.45885	16.6678	6.2456	30.9742	9.1997	6.30763	21.5332	6.28515	10.4099	6.4737	10.617	13.0911	25.6859	42.1414	1.15483	8.6658	2.27773	9.70343	3.9427	6.21294	8.72616	6.09137	7.80876	1.78018	11.4139	6.19495	3.63627	3.60652	28.4028	66.1665	19.1183	0.436786	4.39035	5.87152	8.43368	6.82065	6.37962	5.65853	7.34984	5.01343	5.78137	8.11793	2.46998	3.08096	7.65492	6.43226
ENSG00000137812	KNL1	0.249934	0.0326428	0.118929	0.293625	0.0981113	0.259329	0.154798	1.0527	0.227527	0.776335	0.543143	0.0385248	0.257652	0.345876	0.779248	1.26494	0.0743821	0.110395	2.51522	0.0969461	0.575656	0.186943	1.94785	1.04006	0.227766	25.0595	0.181148	0.763152	0.0872642	0.0554534	12.0363	0.373022	0.215155	18.1736	0.115031	0.0427436	0.0397355	0.0399926	0.029349	0.0526929	0.0860525	0.0411485	0.0365799	0.222658	0.0494037	0.726995	0.0591543	0.567438
ENSG00000137948	BRDT	0.0289241	0.0211989	0.0174772	0.0263524	0.0110847	0.0505855	0.0241803	0.0247544	0.162179	0.0267606	0.0171222	0.089314	0.0159915	0.072344	0.0983104	0.054313	0.0105982	0.063793	0.0146776	0.02553	0.0202939	0.024605	0.0503028	0.0169484	0.160793	115.424	0.0209081	0.0229348	0.00526354	0.0423583	0.0114841	0.0234714	0.023434	0.0149464	0.0320464	0.10677	0.0801816	0.0963547	0.0758179	0.0250543	0.0174532	0.0228127	0.0753158	0.050826	0.0377351	0.0192657	0.0256346	0.01996
ENSG00000138180	CEP55	0.87748	0.12827	0.373313	1.08408	0.211784	0.967241	0.382269	3.87819	0.702234	1.93959	1.80406	0.0464291	0.877654	0.579822	2.08039	3.07924	0.161428	0.385341	10.1012	0.324045	2.20658	0.539407	3.66952	3.04546	0.604954	21.592	0.440286	1.83238	0.227008	0.0292003	45.8654	0.86181	0.811472	53.6207	0.548344	0.0923959	0.107157	0.0763496	0.0531762	0.127812	0.325651	0.0803206	0.0686071	0.522536	0.0387259	0.229941	0.189846	0.474569
ENSG00000138182	KIF20B	2.62301	0.406044	2.24289	1.87671	0.582357	1.41486	2.84806	3.02044	2.22828	3.18589	1.78097	0.4848	0.970688	2.11555	1.85045	3.16068	0.42936	1.21773	4.48208	1.30056	1.49268	1.45677	3.11055	2.07178	1.25839	9.93411	2.57792	3.45229	0.389187	2.56199	19.1984	0.484696	1.57251	24.0636	1.17935	0.523162	0.637177	0.776776	0.560535	0.538468	0.734765	0.461574	0.415931	3.11168	2.67365	0.575331	0.491951	0.724345
ENSG00000140481	CCDC33	0.0194942	0.00928051	0.0144645	0.0266277	0.00874156	0.0143397	0.256956	0.0842449	0.0594416	0.0498967	0.0490359	0.0433133	0.232456	0.0980742	2.24561	0.0304673	0.00696173	0.0292868	0.0412003	0.0256414	0.0687038	0.0174368	0.0292242	0.0275417	0.163251	21.7898	0.0211158	0.0321809	0.0228387	0.0194813	0.00660082	0.0186488	0.0250447	0.0287025	0.712073	0.0418075	1.20142	0.467177	0.0220391	1.49633	0.232738	1.13781	0.0871697	0.133772	0.0159904	0.00535771	0.132884	0.0568628
ENSG00000141316	SPACA3	0.0415861	0.0219025	0.034338	0.0478623	0.014831	0.232754	0.120954	0.0503877	0.141262	0.0523148	0.0839083	0.0275588	0.054779	0.0534636	0.0609301	0.0938246	3.33256	0.0684979	0.0332496	0.0380796	0.148738	0.0477431	0.193008	0.121015	0.139244	174.659	0.55549	0.0500274	0.00818269	0.0434527	0.0445339	0.0460628	0.0528539	0.529482	0.0413887	0.0241413	0.0334596	0.0319157	0.0310053	0.0184391	0.0503306	0.0299142	0.027984	0.19212	0.0386381	0.0255598	0.0285201	0.0380316
ENSG00000143194	MAEL	0.0700616	0.164888	0.243837	0.537663	2.59847	0.163693	0.106251	0.158949	0.191314	0.0834176	0.107073	2.36867	0.05432	0.174935	0.0950475	0.0641743	0.0442474	1.19221	0.0616859	1.13527	0.111069	1.34081	0.190505	0.621384	0.919862	172.046	1.28382	0.0852709	1.01573	1.76529	0.037247	0.0254611	0.155118	0.14599	1.00497	2.78428	0.522511	0.531006	0.333979	1.0628	0.602036	1.19816	1.74098	0.133197	1.99086	0.107552	0.795215	0.709996
ENSG00000143228	NUF2	0.731545	0.0857053	0.366102	0.821939	0.236594	0.733174	0.624169	2.91586	0.696006	2.42795	1.32975	0.470628	0.820958	0.609826	1.73742	4.83904	0.165457	0.411694	7.15869	0.373273	1.52378	0.595589	3.61014	2.37016	0.71644	45.6837	0.939883	2.25905	0.221312	0.386637	22.776	0.711886	0.609694	40.2939	0.380667	0.539516	0.468223	0.45815	0.409673	0.417993	0.962543	0.448095	0.41013	0.823017	0.439259	0.329806	0.543877	0.407244
ENSG00000143452	HORMAD1	0.416203	0.0736384	0.0770445	0.145244	0.0376835	0.134301	0.0766181	0.331971	0.25864	2.8692	0.542694	0.0606253	0.0646448	0.172084	0.388226	1.01274	0.0347379	0.0982001	3.48339	0.0692178	0.0650507	0.0935114	0.318134	0.208842	0.164376	93.793	2.66548	3.61859	0.0228954	0.0561658	0.462021	0.401383	0.0933503	0.0751941	0.0690872	0.0586381	0.0402208	0.0484686	0.030731	0.0711311	0.0842217	0.0364541	0.052702	0.0514595	0.0496747	0.06199	0.0380377	0.0393209
ENSG00000144339	TMEFF2	0.262313	0.0879771	0.239267	0.927819	0.721233	0.094676	0.124593	0.538815	0.307008	0.179055	0.113864	10.1277	0.286775	0.320138	0.0996647	0.0251812	0.019258	0.843956	0.363074	1.51435	0.561266	0.610437	0.324171	0.520579	11.8463	0.745153	0.107538	0.177363	0.081074	7.71899	4.03423	0.00684778	0.185251	0.0104031	0.316217	12.5245	6.43674	8.95975	5.99162	13.3497	9.33842	10.2698	9.10216	0.220657	8.14414	0.0156587	9.6875	0.0288831
ENSG00000144580	CNOT9	18.8396	8.32697	19.1027	20.3293	10.306	20.0413	30.7375	25.9766	20.2482	26.1886	17.4445	11.7796	20.8074	25.554	27.4332	29.8488	7.88534	17.5849	23.3296	18.9028	14.9888	19.221	22.0169	17.5201	27.0378	38.9567	23.9395	26.0097	7.37711	27.411	33.3252	8.87375	20.9215	62.0721	33.9073	12.6019	10.4972	10.9083	9.24047	11.7112	14.958	9.60255	9.84428	29.3013	28.8681	11.0119	8.99856	11.5332
ENSG00000144847	IGSF11	0.37051	2.16089	0.38228	1.16885	1.52368	0.37144	0.411013	1.38683	0.327755	1.06109	0.666221	9.22283	7.31861	0.564649	0.227921	0.170646	1.66504	5.22021	1.19265	5.22303	1.9489	5.42234	1.26087	2.34252	1.00516	38.2012	21.6556	1.26635	0.477497	3.41802	0.0519284	0.0393765	0.38643	0.025296	2.61312	9.36789	13.1671	10.8686	11.0675	7.24897	28.4762	9.73317	7.94671	15.0096	2.28869	0.0511249	11.3325	1.64675
ENSG00000144868	TMEM108	0.904075	1.68536	0.704025	0.875057	2.13558	0.605227	1.53017	0.636997	0.800717	0.712342	0.693556	4.79838	5.00466	2.44624	6.8951	0.386026	0.0955672	5.65111	1.06562	3.68371	0.460371	1.02143	1.10969	0.701028	0.749562	7.34197	0.572346	0.746905	0.320501	5.49696	0.0255972	0.0223107	0.529655	0.265383	1.56702	5.04982	1.30448	1.52455	0.737323	3.28875	1.77999	2.53164	4.22981	0.219092	4.08408	0.0265071	1.79172	0.1053
ENSG00000145491	ROPN1L	1.22986	0.161801	0.264297	0.452823	0.519977	0.99818	0.583174	0.405538	1.32473	0.381956	0.258328	1.22112	0.319709	1.60399	9.74343	6.60119	0.496161	0.440306	0.216277	0.394589	0.453995	0.31579	0.549939	0.308805	0.957536	525.892	0.546905	0.506071	0.150434	0.523965	0.323102	29.2411	0.299402	0.106782	2.06072	1.57146	4.02352	2.28586	0.429311	5.00533	1.00665	5.13342	1.07939	0.45895	0.350127	0.234542	0.838848	0.760669
ENSG00000146648	EGFR	41.6206	8.04807	33.707	20.4876	5.4476	27.0842	23.3945	43.1235	34.6882	77.2507	31.6351	6.5914	14.8527	25.8041	23.7011	7.16462	7.77906	32.5597	30.2085	35.4919	14.5483	19.8693	14.3063	16.7324	29.2218	6.92358	43.8245	81.0672	3.54275	4.93278	60.5772	0.0833984	24.0617	0.275885	5.11348	6.10537	8.39108	7.54814	5.83415	3.78564	2.34318	3.39858	5.83119	21.1655	2.85952	19.1398	4.87369	7.55768
ENSG00000147081	AKAP4	0.0704449	0.0680187	0.0300706	0.0350125	0.0162265	0.0550929	0.0628876	0.039061	0.317609	0.105256	0.0389754	0.0166752	0.062932	0.150146	0.059187	0.0376032	0.0274842	0.20224	0.0371847	0.0349383	0.0431833	0.0466713	0.109225	0.0446977	0.401676	458.492	0.0427176	0.0972873	0.0155014	0.0499201	0.0350423	0.0143099	0.043351	0.0256087	0.0610655	0.0136454	0.00958083	0.0150293	0.0106157	0.0125211	0.00750633	0.00777522	0.0124903	0.054374	0.0237661	0.0458319	0.0134741	0.0501194
ENSG00000147183	CPXCR1	0.00168538	0.00290228	0.000897134	0.0008175	0.00102627	0.00256551	0.00124359	0.00103994	0.0108093	0.00369808	0.00176994	0.00089851	0.000611473	0.00436689	0.012756	0.00374975	0.000716707	0.00353963	0.00494371	0.00127432	0.0013517	0.00170606	0.0025015	0.00238076	0.00943543	10.1245	0.00159097	0.0037779	0.000489444	0.000968631	0.00138361	0.000416993	0.00214954	0.00453603	0.0134001	0.000163493	0.0366163	0.0176215	0.000158976	0.0252565	0.00290283	0.00792964	0.00190284	0.0020365	0.000115256	0.00127646	0.00204863	0.000934706
ENSG00000147378	FATE1	0.552824	0.239337	0.158102	0.191938	0.254225	0.457116	0.234326	0.765146	0.427845	0.168693	0.272089	0.860433	0.461839	1.46415	0.432745	0.187139	0.0729816	0.312129	0.0840218	0.224126	0.134782	0.138772	0.368398	0.15357	0.564568	538.525	0.225745	0.174083	0.38669	0.0747015	0.0451974	0.0243851	0.168588	0.0626543	1.01278	1.13078	0.0542841	0.064352	0.0586534	0.158677	0.0437538	0.0907154	0.968518	0.18233	0.0431467	0.114286	0.0388483	0.467489
ENSG00000147381	MAGEA4	0.00808724	0.00317495	0.00287983	0.00356288	0.00422183	0.00440594	0.0110439	0.0162511	0.0160478	0.00661381	0.00321051	0.0167072	0.00261326	0.0129413	0.00777931	0.00510795	0.00252846	0.0145953	0.00632036	0.00365293	0.00331802	0.0156875	0.00647193	0.00493452	0.0163911	28.5751	0.00694426	0.00604757	0.00141144	0.0165399	0.0139426	0.00140857	0.0109516	0.00319782	0.0573898	0.00972124	0.00546309	0.00676545	0.00855658	0.00575898	0.00126031	0.0130511	0.0348429	0.00492828	0.00260161	0.0102594	0.00742446	0.00842531
ENSG00000150556	LYPD6B	0.192954	0.0286789	0.184625	0.0721601	0.0238506	0.131695	0.330796	3.82048	3.08236	50.3545	1.60511	1.16031	0.110078	0.159827	1.20813	1.5843	2.23759	0.0444701	1.9947	0.0685941	15.8109	0.12834	0.544624	0.477335	7.091	25.204	0.0570506	43.5844	0.0139385	0.397272	8.50486	0.0641143	0.137349	5.36542	0.28197	1.29729	0.203251	0.252289	0.200346	1.72712	0.198756	1.43935	1.24989	0.337773	0.404626	0.188751	0.411936	2.61458
ENSG00000151962	RBM46	0.0396392	0.00598505	0.00812783	0.0507812	0.030042	0.103205	0.0306004	0.0350427	0.0944141	0.0162164	0.0800186	0.0135855	0.0155689	0.366517	0.0241695	0.0231038	0.0418604	0.0480801	0.0123354	0.0386296	0.0382222	0.177565	0.0677701	0.0634161	0.112552	18.0896	0.23884	0.0117704	0.00722258	0.0195948	0.118058	0.00277028	0.0134038	0.0360385	0.0714571	0.0279265	0.025497	0.0536116	0.0106043	0.0696214	0.105329	0.0368856	0.0331707	0.0513776	0.012371	0.0912886	0.0380729	0.0343982
ENSG00000152582	SPEF2	1.40094	0.171577	1.68982	1.92313	0.813456	1.22292	9.44139	5.46397	2.70614	0.959037	1.78854	2.00917	1.77135	5.9655	3.86423	2.38414	1.44337	1.21255	0.61796	1.40955	1.15266	1.43792	1.28463	1.14884	3.11224	6.76768	4.89942	1.0304	0.32664	1.88207	1.96414	0.223087	1.33814	0.311088	6.58984	2.3089	2.4608	3.46799	1.21254	3.2862	1.38592	1.7493	1.64272	5.06949	1.94559	0.476814	0.941958	2.87272
ENSG00000154040	CABYR	0.830963	0.231629	1.77663	1.78102	0.325355	1.02239	2.40984	1.24686	1.81218	0.941937	1.26446	3.31822	1.7103	0.764151	0.795499	0.468222	0.167765	1.21918	0.568366	1.18655	0.865411	0.867492	0.680005	0.668248	1.75923	250.746	1.33154	0.871832	0.171533	0.925498	2.8895	0.0899439	2.37333	0.862558	6.44801	4.003	1.00812	1.28216	0.912468	2.57217	3.4379	2.49209	2.7486	1.49512	0.996647	0.282584	2.12114	0.342128
ENSG00000155087	ODF1	0.117642	0.118377	0.0613894	0.0738566	0.034418	0.073964	0.0851936	0.0744192	0.490612	0.155262	0.0789649	0.38599	0.0676674	0.22993	0.111019	0.0805026	0.0419759	0.251148	0.0680368	0.0597058	0.076628	0.0842912	0.165065	0.0693138	0.574842	742.52	0.104722	0.133674	0.0264006	0.0973126	0.0658983	0.0218498	0.0817124	0.607614	0.200633	0.436797	0.558913	0.759101	0.521229	0.175643	0.0590924	0.187852	0.355555	0.0949744	0.0453187	0.0666331	0.117243	0.0730456
ENSG00000155495	MAGEC1	0.00556638	0.00820743	0.0156403	0.0180965	0.00463125	0.0107388	0.0111063	0.0104492	0.00874917	0.00679075	0.00780843	0.0123103	0.00555752	0.0132705	0.00829239	0.192835	0.00443453	0.0118601	0.00526365	0.00452501	0.00564377	0.00430851	0.00357321	0.00593662	0.0144463	16.5948	0.00902816	0.00533567	0.00334594	0.0142061	0.0108394	0.00599108	0.0415918	0.0440578	0.0178344	0.0125641	0.00903692	0.0169691	0.0078835	0.0144225	0.0210514	0.0138699	0.0136491	0.0182481	0.0146345	0.00647673	0.0135876	0.0218968
ENSG00000155622	XAGE2	0.176588	0.00593712	0.0477671	0.0323518	0.0213811	0.236608	0.0326041	0.0175444	0.105692	0.162284	0.0363846	0.0229129	0.00358217	0.00928807	3.52584	0.0103761	0.0340064	0.0355127	0.00314795	0.0383252	0.0242968	0.0274412	0.0312305	0.0177694	0.0249977	1.08002	1.73267	0.452017	0.00190593	0.0114641	0.0726654	0.00859441	0.0336662	0.0030381	0.0445384	0.0133072	0.0114807	0.0193074	0.0126773	0.0451409	0.0458995	0.0130123	0.0260967	0.0521273	0.0120488	0.0105164	0.025383	0.157338
ENSG00000155719	OTOA	0.200227	0.016289	0.060416	0.244121	0.0167088	0.163876	0.0428178	0.0398634	0.127375	0.0337532	0.131808	0.253844	0.194598	0.0497899	0.309045	1.0777	0.0209191	0.0628655	0.0186757	0.0632215	0.0469112	0.111808	0.13141	0.107269	0.116147	6.0556	0.144801	0.0314837	0.0152264	0.0914338	0.0228863	0.0574695	0.19282	0.0677171	0.478848	0.316722	0.0784073	0.0709524	0.0577591	0.0676417	0.315384	0.0682726	0.211791	0.0449456	0.088841	0.0382258	0.0657872	0.034158
ENSG00000156009	MAGEA8	0.0687523	0.0457748	0.11713	0.164462	0.0444267	0.110707	0.264365	0.255081	0.198147	0.142965	0.0548878	0.0507221	0.0289891	0.1773	0.0965522	0.0811766	0.0515672	0.106047	0.0732434	0.131607	0.0872915	0.113867	0.0926524	0.0813307	0.176909	3.19962	0.199777	0.0969578	0.0321965	0.511823	0.0296587	0.00676858	0.178701	0.0355357	0.0946346	0.0314726	0.0329879	0.0435718	0.0196048	0.0237152	0.0340095	0.0220054	0.0232805	0.264322	0.408492	0.03312	0.0209394	0.037323
ENSG00000158639	PAGE5	0.0212024	0.0213839	0.0201857	0.0182462	0.00986056	0.0536142	0.0249182	0.0585787	0.0386378	0.109055	0.0377776	0.00962498	0.0228384	0.092878	0.0636594	0.0759711	0.0234112	0.0268879	0.0325347	0.0173927	0.0470311	0.0212146	0.165191	0.0441689	0.0513691	33.7839	0.0256541	0.0593052	0.00750264	0.0269876	0.0319264	0.0456457	0.0167697	0.0960654	0.0299646	0.0144994	0.00706382	0.013418	0.0100355	0.0187165	0.0196117	0.0140382	0.0121853	0.0182681	0.0247721	0.324791	0.0156503	0.0777624
ENSG00000160188	RSPH1	0.384386	0.22464	0.345308	0.44336	0.193253	0.773751	2.25061	1.74287	1.89897	5.00454	2.36789	14.3392	1.54211	12.3276	30.9086	0.443602	2.17412	1.49405	0.923195	1.38935	3.56525	2.87504	6.41532	5.26959	7.00167	78.5972	0.915429	4.35739	0.0888526	5.94689	0.225714	0.31437	0.33437	2.88707	57.9882	15.6546	39.5609	37.2652	20.496	41.7266	13.6909	25.2217	15.3285	3.25806	6.54638	0.4803	12.9089	6.56334
ENSG00000160471	COX6B2	0.106603	0.037325	0.0687697	0.201348	0.0616784	0.974911	0.395206	1.48185	1.44515	2.88161	1.79757	0.132908	0.133884	0.239597	0.494269	0.47761	0.144832	0.199384	1.34781	0.160005	0.192108	1.43131	0.301904	6.39001	1.08803	151.792	0.286738	2.03313	0.0369674	1.02373	0.0983202	0.735437	0.131454	0.165091	1.29873	0.0929524	0.108182	0.132517	0.0958578	0.7543	0.176499	0.169304	0.106434	0.883722	0.838143	0.0787691	0.167313	0.825094
ENSG00000160505	NLRP4	0.00935603	0.00804273	0.0133968	0.0249841	0.00411678	0.00766548	0.0100171	0.0108031	0.0143757	0.0164585	0.0270755	0.031062	0.00819785	0.0392506	0.0174154	0.100378	0.00647059	0.00938741	0.00981283	0.00556599	0.00492135	0.00667039	0.0866863	0.0125739	0.0253446	9.20691	0.0309533	0.0141139	0.00424442	0.012937	0.00558473	0.0207645	0.0234829	0.624666	0.0282927	0.0311441	0.0480983	0.0513736	0.0327584	0.0681298	0.285552	0.056886	0.0428779	0.157931	0.0205526	0.00483597	0.165383	0.00584339
ENSG00000160886	LY6K	2.71085	1.44197	1.00618	1.05007	0.555084	3.57	0.702133	5.27518	4.28867	5.98475	1.5395	1.12093	0.16321	1.22117	0.911871	0.212667	0.104984	0.508886	9.78725	0.541179	0.811164	0.517868	0.293401	0.35674	1.1486	43.3756	3.13515	4.85536	0.467066	0.838559	40.6815	0.0830578	1.2704	0.233539	0.403156	1.23263	0.894899	0.892628	0.891243	1.25961	1.04426	0.876326	1.00109	0.884715	0.884871	0.0714196	1.00795	0.88111
ENSG00000163530	DPPA2	0.00164873	0.00149661	0.00213682	0.00207187	0.00322168	0.00273416	0.00342444	0.0101178	0.00301325	0.00215139	0.000643704	0.00193039	0.00316399	0.00418776	0.0056841	0.0154912	0.00130829	0.00269668	0.0011024	0.00115584	0.00188376	0.00133697	0.0121006	0.0019151	0.00450416	6.79017	0.00247459	0.000912896	0.000759468	0.0015817	0.00195361	0.0267376	0.00272775	0.00087569	0.0595362	0.00198689	0.0067052	0.00747927	0.00177054	0.00796262	0.00447472	0.00145503	0.00374426	0.00255039	0.00119744	0.00643916	0.00331676	0.0984314
ENSG00000164304	CAGE1	0.0218142	0.00944415	0.013714	0.020075	0.00714173	0.019798	0.0193114	0.0311615	0.0372089	0.0326836	0.0265958	0.0101479	0.0258741	0.0431354	0.0182463	0.0551894	0.00989517	0.0160123	0.038619	0.0122641	0.0126513	0.0147084	0.0189187	0.0153745	0.0402895	14.2735	0.0342652	0.0301236	0.0055593	0.0121157	0.0349726	0.00582355	0.0149538	0.0484452	0.0517424	0.00909613	0.0118902	0.0115754	0.00744837	0.0172042	0.0121127	0.00977298	0.00978999	0.0217523	0.0130231	0.0113924	0.00988202	0.0190046
ENSG00000165309	ARMC3	0.0110318	0.00740223	0.0169071	0.0472527	0.0261796	0.00851978	0.0957275	0.0152135	0.042389	0.00915461	0.0652579	0.415654	0.00652797	0.123953	2.45695	0.0149792	0.130272	0.0309375	0.0317807	0.0269638	0.0181451	0.0578583	0.0326839	0.0329247	0.0983653	26.3536	0.0515393	0.0113227	0.00576133	0.0347557	0.0112892	0.0375162	0.0367554	0.051427	1.6712	0.426304	2.41594	1.83026	0.361003	2.78266	0.625962	1.88472	0.494874	0.0608398	0.0380167	0.00558779	0.642879	0.21549
ENSG00000165509	MAGEC3	0.0830684	0.0752715	1.20982	1.24555	0.0644411	0.113442	0.270593	0.177213	0.132595	0.032372	0.227005	1.33384	0.0455637	0.386661	0.109804	1.15439	0.0267242	0.0759429	0.0269251	0.094879	0.0444776	0.047978	0.0497606	0.0479822	0.231845	1.76942	0.237659	0.0385592	0.0624916	0.902725	0.0544403	0.00210666	2.77634	0.00292671	1.09825	0.936274	0.922262	1.45971	0.866608	1.39023	3.29382	1.6629	0.853343	0.170395	0.787897	0.0112049	1.4047	0.0916889
ENSG00000165584	SSX3	0.00535606	0.00453503	0.00468333	0.00569958	0.00283142	0.00805563	0.00715296	0.00858897	0.00782571	0.00428242	0.00331025	0.00362706	0.00375291	0.118945	0.00740148	0.00521324	0.0028985	0.0100987	0.00417234	0.00582768	0.00972251	0.00514172	0.00546262	0.00456879	0.0152308	19.0147	0.00772897	0.0066935	0.00285308	0.00603971	0.00410024	0.00498145	0.00504933	0.00917782	0.00659795	0.00318751	0.00333585	0.00284463	0.001891	0.00732389	0.00305132	0.0208988	0.00447797	0.00599889	0.0080946	0.00521204	0.00533791	0.00239879
ENSG00000166049	PASD1	0.0191102	0.0127902	0.00770941	0.0332786	0.00570351	0.00769987	0.0187532	0.0215661	0.014877	0.0142354	0.0104707	0.00481118	0.00541558	0.0198255	0.0107651	0.00387249	0.00311253	0.0185693	0.00641382	0.0190692	0.00495256	0.0133582	0.00850139	0.0116197	0.0228237	31.9307	0.0274703	0.0197088	0.00537989	0.00740929	0.0210758	0.00290784	0.00872409	0.0166266	0.00607027	0.00611085	0.0192806	0.0153794	0.0135469	0.0416623	0.00282847	0.00533653	0.00718409	0.0275304	0.00571535	0.00694974	0.00358521	0.00203141
ENSG00000166118	SPATA19	0.0377086	0.0376628	0.102563	0.102056	0.0419552	0.0308923	0.0782694	0.162779	0.166093	0.145616	0.0653659	0.156115	0.0243712	0.179945	0.0633503	0.0158243	0.0150964	0.12386	0.300645	0.0577141	0.0386854	0.0774044	0.0555579	0.0432966	0.238419	247.575	0.0463311	0.147931	0.0566977	0.232986	0.0208794	0.00783608	0.110503	0.0610035	0.0670157	0.16962	0.129651	0.175556	0.131864	0.0809093	0.0253057	0.0983836	0.134377	0.0368007	0.237501	0.0248776	0.0350855	0.0316087
ENSG00000166351	POTED	0.000540947	0.000789513	0.000201087	0.000428792	0.000195809	0.000614991	0.000555986	0.000670321	0.00520885	0.000672992	0.000579136	0.000222345	0.000717012	0.00168821	0.000558131	0.000271801	0.000927223	0.000848874	0.00097627	0.000648235	0.000870557	0.000789118	0.000709465	0.000807751	0.00351098	2.36479	0.000975897	0.000406976	0.000199516	0.000466349	0.000753413	0.000296351	0.000520949	0.000261609	0.00122693	0.000168053	0.0003305	0.000616374	4.05171e-05	0.00085446	0.000577692	0.000286772	0.000554682	0.000710889	0.000303581	0.000258186	0.000436187	0.000463906
ENSG00000166796	LDHC	0.322283	0.420597	0.177781	0.19778	0.236269	0.279886	0.172958	0.154912	0.540149	0.331232	0.380687	0.215691	0.316462	0.410061	0.243528	0.215013	0.103187	0.239853	0.107416	0.166506	0.159345	0.228493	0.390376	0.228476	0.541455	346.348	0.247986	0.396544	0.159435	0.212285	0.407018	0.0737019	0.168624	0.822925	0.504973	0.240015	0.308974	0.352148	0.254952	0.282996	0.239098	0.21132	0.172643	0.253746	0.181052	0.361715	0.280709	0.726545
ENSG00000166816	LDHD	18.9396	50.7243	10.3476	12.9788	29.7979	26.8369	10.8812	8.0744	20.7922	10.0682	10.5433	25.3396	21.5749	26.3075	11.1165	2.21381	13.5297	7.53969	16.1647	10.1891	29.4692	9.14735	9.04899	37.1918	16.9617	4.73554	27.0658	7.08704	55.8612	16.3637	2.47142	1.2971	11.0671	0.293896	25.0823	24.1925	16.8803	17.5115	14.9194	18.8616	17.116	12.2961	23.7142	39.2071	12.7644	94.7164	22.7116	35.7634
ENSG00000168078	PBK	0.397685	0.155113	0.170111	0.50153	0.216678	0.904013	0.234895	3.9867	0.459861	2.71858	1.53828	0.0718041	0.925753	0.368173	1.72825	2.51135	0.231944	0.219274	10.1058	0.15276	2.24998	0.433259	4.0614	3.98983	0.513536	80.6081	0.559923	2.51747	0.214314	0.0563806	42.8499	0.421729	0.36805	45.4821	0.130316	0.135034	0.145962	0.141801	0.083	0.104073	0.191448	0.11126	0.104619	0.452118	0.0443446	0.772299	0.125147	0.468418
ENSG00000168491	CCDC110	0.584599	1.00337	2.70305	2.00047	0.528679	0.811314	1.20072	0.765572	0.996401	0.337728	2.25892	0.857629	0.719891	3.97137	0.595307	0.633044	5.60034	1.53522	0.535386	1.64103	1.97866	1.42056	0.678339	1.05131	1.11702	111.126	0.520157	0.365522	0.215858	2.12718	0.257243	0.0195894	1.8062	0.635577	3.90905	1.06199	0.954705	1.35528	0.679021	0.908949	0.473549	0.438332	0.707542	2.32099	2.42471	0.223497	0.53809	0.692665
ENSG00000168594	ADAM29	0.0358816	0.00845439	0.324429	0.0367042	0.00339107	0.00829638	0.778416	0.0339556	0.139894	0.0179997	0.0147968	0.108457	0.0126516	0.0223526	0.275782	0.0708817	0.00606983	0.02216	0.00767648	0.0134475	0.00943623	0.00793974	0.140434	0.0119358	0.0730745	39.1592	0.0140764	0.0223207	0.00266797	0.0194707	0.00853624	0.00872006	0.14909	0.015236	0.111975	0.102312	0.0317766	0.0787543	0.027915	0.110367	0.0244322	0.0310138	0.0581027	0.0182847	0.0103534	0.00550844	0.0412654	0.0229716
ENSG00000168610	STAT3	135.972	79.4937	162.902	135.906	59.4014	145.951	125.993	109.675	131.548	89.8839	84.687	25.0846	79.9945	118.805	184.933	101.176	40.7451	125.094	98.9006	113.468	76.9534	115.167	93.4866	86.0175	108.055	40.0417	142.815	98.0083	55.6072	34.1261	85.3038	107.146	150.636	121.928	90.0619	24.596	23.7125	21.8541	19.5608	30.7806	38.9849	19.1867	21.157	119.047	33.1723	86.5439	26.0251	59.1624
ENSG00000169551	CT55	0.033849	0.0102286	0.0257476	0.0261876	0.0104603	0.0253289	0.0431611	0.0206426	0.0324125	0.013249	0.0247787	0.173948	0.0412743	0.0468744	0.0420842	0.0290682	0.00959484	0.0223119	0.00573341	0.022819	0.0178073	0.0197114	0.013657	0.0172406	0.0292559	4.23835	0.0365572	0.0202467	0.00869089	0.0363991	0.0068453	0.00387661	0.0222274	0.00547511	0.0252588	0.180867	0.127986	0.158218	0.116445	0.102845	0.0358387	0.111771	0.151009	0.0280402	0.040347	0.00553471	0.0473541	0.0198439
ENSG00000170965	PLAC1	0.0202596	0.0985129	0.053728	0.0458635	0.00954282	0.0153905	0.0700133	0.0539471	0.0238558	0.0828221	0.108158	0.0263905	0.0130874	0.0209632	0.137947	0.0539863	0.010738	0.0276638	0.0364425	0.0239728	0.0398487	0.0179449	0.0144114	0.0295823	0.0305866	1.76611	0.0301674	0.157459	0.0138189	0.02203	0.686448	0.00944042	0.074416	0.130201	0.0997017	0.0240107	0.0174926	0.0185871	0.0165301	0.018356	0.0276665	0.0190613	0.0208826	0.237009	0.0233847	0.0114821	0.0223871	0.0214166
ENSG00000171402	XAGE3	0.365972	0.0222397	0.00930416	0.0511976	0.00539928	0.10045	0.0146918	0.0155158	0.476251	0.0222664	0.00903253	0.0232912	0.00643531	0.0259861	0.0914367	0.00246257	0.0256751	0.0107294	0.00308575	0.0102362	0.0462329	0.0128025	0.0164028	0.0176151	0.00929531	2.42006	0.031625	0.0284769	0.00235414	0.0187425	0.0186227	0.00278146	0.0141236	0.00535655	0.0187656	0.0211753	0.0250101	0.0363704	0.0282955	0.0297952	0.0236048	0.0168584	0.0327702	0.00872506	0.0141382	0.235395	0.028842	0.0886861
ENSG00000171405	XAGE5	0.00236711	0.00134005	0.00263308	0.0027612	0.0010079	0.00258823	0.00365725	0.00605609	0.00780902	0.0339995	0.00255469	0.00218063	0.00209349	0.00384217	0.00225322	0.000532739	0.00900485	0.00261507	0.000798973	0.00203523	0.00136292	0.00100373	0.00350075	0.00233232	0.00519771	2.88355	0.00370389	0.0128797	0.000861227	0.00396386	0.00256853	0.00131547	0.00308593	0.0024531	0.00866081	0.00145278	0.00158809	0.00112492	0.0015499	0.0074555	0.118136	0.00311147	0.00278148	0.00340328	0.00379265	0.000183097	0.0157754	0.000926118
ENSG00000171772	SYCE1	0.790863	0.215897	0.256262	0.729521	0.355073	1.37574	1.12775	0.544328	1.75415	0.45847	0.219687	12.3119	0.826425	2.25642	0.547188	1.07874	1.45245	0.830691	0.552763	0.757222	0.478535	0.937349	0.520667	0.567994	2.2104	118.864	0.62807	0.307358	0.16903	21.9391	0.434482	0.164249	0.395998	0.413059	1.61343	12.576	6.2159	8.06697	5.07039	5.94791	3.43063	4.92063	8.38673	3.11306	22.8164	1.28496	1.86952	0.699002
ENSG00000173421	CCDC36	2.38592	0.477332	1.04917	0.986399	0.675537	1.45755	2.05732	0.915816	2.14815	0.589815	0.312195	0.148557	1.34751	1.65886	0.830093	0.411053	0.0631989	1.4818	0.275427	1.34331	0.360968	1.361	0.45532	0.661005	0.558303	41.7346	1.21444	0.771492	0.458204	0.340262	2.56563	0.224677	1.39145	0.0260553	0.257884	0.122486	0.123448	0.0995895	0.095754	0.13326	0.14313	0.107321	0.104608	5.35897	0.309213	0.0709682	0.12803	0.198153
ENSG00000174016	FAM46D	0.00291662	0.00134419	0.00134953	0.0031825	0.00269697	0.00299885	0.00499433	0.00313128	0.0151446	0.00383244	0.0103148	0.00297254	0.0516048	0.0561932	0.00289112	0.00208129	0.00494537	0.00311949	0.00154915	0.00344594	0.00743451	0.00319966	0.0036538	0.00298137	0.020148	3.7189	0.0202336	0.00573292	0.000790627	0.0035822	0.00424776	0.000514379	0.00330016	0.00170324	0.0160918	0.00327296	0.00639241	0.00673342	0.00288222	0.0062862	0.00269327	0.00523585	0.00424531	0.0367106	0.0050178	0.00115961	0.00186892	0.00927379
ENSG00000174450	GOLGA6L2	0.00914188	0.0199465	0.013048	0.0175707	0.0107171	0.00932475	0.0159059	0.0225874	0.0499106	0.0201067	0.017084	0.0202283	0.126867	0.040305	0.0175122	0.00979005	0.0112353	0.0292341	0.0206771	0.00934793	0.014218	0.0134161	0.0203012	0.0146669	0.0841706	164.305	0.0141469	0.0198526	0.00674766	0.0221063	0.0114645	0.00498338	0.0218683	0.0101866	0.0194913	0.0175555	0.0268353	0.0196112	0.0314955	0.0224402	0.00725422	0.017854	0.0205639	0.0163261	0.0101265	0.0141699	0.0153317	0.0155252
ENSG00000175646	PRM1	2.66322	3.1722	1.45674	1.87773	0.696133	2.03723	2.27445	1.69231	11.388	3.79436	1.858	0.70913	1.82527	6.09772	1.69562	1.39733	1.14989	6.68499	1.66675	1.46806	1.88432	2.04365	4.57161	1.81509	14.2163	20710.6	1.84558	3.53369	0.692767	2.1481	1.31017	0.564967	2.00425	0.982439	2.26925	0.473971	0.397068	0.506638	0.438949	0.444185	0.344746	0.349926	0.490911	2.08401	0.92657	1.75211	0.429257	1.85895
ENSG00000176746	MAGEB6	0.00103014	0.0013381	0.0013036	0.000575542	0.000531492	0.00131628	0.00369415	0.00227641	0.00411281	0.00167522	0.0020358	0.000667255	0.00118341	0.002866	0.00112676	0.00242398	0.00174061	0.00480509	0.0012009	0.000980107	0.000918969	0.00165721	0.00124545	0.00247813	0.00618351	7.77506	0.00247591	0.00121601	0.000616759	0.00225058	0.00271411	0.000845616	0.00248782	0.00902649	0.0013377	0.000676364	0.000447317	0.000793333	0.000478	0.000416238	0	0.000892437	0.00204278	0.00105128	0.00252916	0.00207288	0.00116655	0.00150671
ENSG00000176988	FMR1NB	0.0347578	0.0205479	0.0466574	0.0449915	0.0153281	0.045167	0.0683727	0.0411407	0.0728899	0.0450573	0.0390805	0.0408656	0.0356341	0.101293	0.0464757	0.0997006	0.0209676	0.0441956	0.0234283	0.0331465	0.0289284	0.0410969	0.0514889	0.0342293	0.140138	114.409	0.0776749	0.049286	0.0102103	0.0904732	0.0259341	0.014671	0.0346033	0.0347698	0.0829494	0.0388859	0.0251	0.0327637	0.0258705	0.0472422	0.029402	0.0318627	0.0499678	0.0687958	0.0824608	0.0992671	0.0392604	0.0423213
ENSG00000177294	FBXO39	0.860873	0.0688166	0.174277	0.309778	0.147372	0.8264	0.799937	0.731308	0.728072	0.490042	0.190788	0.151946	0.0869439	0.341629	0.47261	0.447415	0.0309338	0.207482	0.792408	0.234947	0.141322	0.238362	0.294346	0.186903	0.474073	42.8822	0.342771	0.50298	0.0759165	0.0431739	0.342445	0.0514045	0.182456	0.20987	0.326014	0.140687	0.07857	0.123673	0.073464	0.107438	0.0634678	0.104604	0.0942648	1.86563	0.0273806	0.639982	0.0660229	0.145065
ENSG00000177947	ODF3	0.0578933	0.024419	0.0508768	0.0387754	0.019929	0.0350309	0.0465299	0.0367214	0.0680849	0.0560013	0.0378412	0.0564145	0.0134456	0.0450578	0.050755	0.0446703	0.0303679	0.0392595	0.018394	0.0392647	0.0311381	0.0410898	0.042464	0.028896	0.044588	22.4835	0.0890594	0.065425	0.0133024	0.0906719	0.0128021	0.0842457	0.0451095	0.0301732	0.0237749	0.0625202	0.0226248	0.0260854	0.0213135	0.0264158	0.0277177	0.0240073	0.034581	0.0805151	0.0904559	0.0125104	0.0144372	0.0201031
ENSG00000178093	TSSK6	1.70227	0.465383	1.45796	1.48806	0.516325	1.00635	2.11227	1.83871	2.20995	2.7917	1.5371	0.998715	1.56789	2.92405	1.34298	2.91197	1.23718	1.60015	1.64241	1.36736	1.85482	1.41011	2.61146	1.57372	2.63199	439.273	3.07598	3.90106	0.376957	2.13332	2.58067	1.27281	1.47076	3.62455	1.99996	0.935511	0.990076	0.984244	0.977595	0.923972	1.93181	1.00059	0.821445	1.81934	1.81071	1.33005	1.059	1.66221
ENSG00000179083	FAM133A	0.087013	0.0111861	3.11475	2.73461	0.433402	0.0592167	0.440413	0.2976	0.148638	0.128022	0.0464424	3.3146	0.425163	0.321284	0.0758528	0.118431	0.0283652	0.102361	0.0138678	0.105751	0.0564232	0.205706	0.0921988	0.130957	0.142282	17.4132	0.345452	0.160726	0.120171	3.46976	0.0700253	0.00772723	1.79608	0.00873285	4.45086	4.47806	3.12654	5.31738	2.72289	5.86136	3.32702	2.27507	3.26562	0.58285	4.4093	0.0375108	2.42607	0.0366853
ENSG00000180113	TDRD6	1.11837	0.585143	1.16727	1.2866	0.719406	0.985006	1.77641	1.55573	1.25052	1.26919	1.33985	1.43857	0.97455	3.11171	1.31053	1.36852	0.499537	2.44635	0.652749	2.82724	0.855713	1.60309	1.00449	0.999904	2.54809	28.4387	2.40149	1.251	0.574393	15.6573	0.506379	0.0608603	0.92855	0.0396983	4.17437	1.31584	1.2737	1.22509	1.15185	1.18659	1.62197	0.957051	0.99549	1.90537	14.9915	1.09167	1.24134	1.07195
ENSG00000181433	SAGE1	0.0116873	0.00701081	0.013069	0.036486	0.00354195	0.01234	0.0122115	0.0111788	0.0184695	0.00582422	0.0808518	0.0882638	0.0373445	0.0186928	0.0383737	0.018565	0.0289261	0.00990543	0.00729286	0.00765813	0.00570781	0.00632096	0.0216805	0.00542035	0.0386079	8.87749	0.0220851	0.0065131	0.00360966	0.102698	0.00596692	0.0108598	0.0180622	0.0357115	0.443883	0.0557705	0.125219	0.0738922	0.0447115	0.187331	0.471477	0.169439	0.0981852	0.0112267	0.0575646	0.0105446	0.175727	0.0107828
ENSG00000183206	POTEC	0.0012589	0.0015509	0.00122582	0.00109088	0.00075886	0.00294953	0.00168039	0.00147631	0.00517606	0.00175671	0.000823432	0.0028037	0.00162985	0.00838481	0.00149411	0.00186366	0.0511193	0.00272852	0.0015026	0.00146129	0.0014537	0.00206037	0.00182142	0.00429715	0.010098	6.50406	0.00401503	0.00157069	0.000759352	0.00210612	0.00303634	0.000871097	0.00142037	0.00857025	0.00389841	0.0012989	0.00192198	0.00244398	0.00147052	0.00463907	0.00246356	0.00137928	0.00208784	0.00232441	0.00189213	0.00148449	0.00127586	0.000592541
ENSG00000183305	MAGEA2B	0.0010106	0.000582045	0.00294835	0.0021863	0.00087738	0.000372458	0.000981549	0.000802949	0.000468647	0.000625224	0.000410988	0.00114193	0.000336589	0.000958224	0.000874417	0.000437303	0.000442277	0.00041695	0.000992281	0.000695491	0.0003939	0.000650895	0.000322139	0.000639163	0.000752776	0.0334593	0.000890291	0.000927656	0.000403801	0.000727178	0.000633234	0.000314086	0.00473523	0.000695057	0.000512085	0.000380641	0.000804671	0.000464313	0.000392346	0.000985	0.000483333	0.000736782	0.000508	0.000607278	0.000429302	0.000276752	0.000455424	0.0005944
ENSG00000183434	TFDP3	0.00390371	0.00204192	0.00438827	0.00467588	0.00183909	0.00269427	0.00783923	0.00341827	0.280824	0.0339985	0.0332647	0.00224612	0.00379771	0.00893371	0.00892663	0.00301822	0.00223232	0.00845656	0.00343809	0.00685536	0.00411081	0.00402598	0.00383267	0.00318719	0.00758751	10.0164	0.00438212	0.0372592	0.00093128	0.00337407	0.00366373	0.00105371	0.00533016	0.0250009	0.0118911	0.00223923	0.00272018	0.00387057	0.0017479	0.0131632	0.00166239	0.0045634	0.00469108	0.00374844	0.00245014	0.000825735	0.00225906	0.00295412
ENSG00000183831	ANKRD45	0.267687	0.0602545	0.189225	0.354593	0.536589	0.451978	1.65049	0.260855	0.361041	0.0955179	0.114698	2.6346	0.755738	0.814253	1.78941	0.37614	0.0998073	0.438002	0.0835557	0.78296	0.179802	0.509072	0.167323	0.478492	0.803326	28.8387	0.885948	0.104305	0.0578426	1.01173	0.295597	0.0176319	0.166497	0.0748964	4.11056	3.0009	6.49182	6.62263	3.54664	3.90571	1.47174	3.2158	2.66595	1.46462	0.857831	0.0538512	1.67974	0.945081
ENSG00000184033	CTAG1B	0.0066249	0.00339181	0.0258191	0.0213561	0.00310256	0.00675257	0.0173648	0.00893673	0.00697643	0.00516076	0.0035129	0.0031438	0.00453674	0.00561147	0.0101349	0.00414556	0.00239024	0.016239	0.00500899	0.0193526	0.00669426	0.0156218	0.00589904	0.0100794	0.00693718	0.120803	0.00854779	0.00635944	0.00235949	0.00776033	0.00702964	0.00552719	0.0200912	0.00420701	0.00633187	0.00360775	0.00272069	0.00240118	0.00159143	0.00472431	0.00348101	0.0038966	0.00135415	0.007943	0.00577693	0.00269292	0.00193108	0.00253765
ENSG00000184650	ODF4	0.0289878	0.0238209	0.0209205	0.0232637	0.00875081	0.020614	0.0323607	0.149265	0.0725612	0.0522246	0.0794658	0.0173879	0.0146656	0.0232381	0.0242682	0.0156021	0.00578924	0.0210339	0.30452	0.017134	0.0144056	0.019993	0.0139791	0.0144501	0.0455332	28.4854	0.0340808	0.052868	0.0067792	0.0215163	0.00868903	0.00462526	0.0207922	0.0111262	0.0204798	0.0173554	0.0202215	0.0205722	0.0193687	0.0195613	0.0200019	0.0148412	0.0154714	0.0238408	0.0189051	0.0078508	0.0172423	0.0106045
ENSG00000184735	DDX53	0.00294494	0.00469665	0.00528133	0.00422989	0.00191407	0.00307143	0.0086707	0.00939417	0.0106781	0.00406346	0.00425044	0.00625224	0.00273167	0.0271003	0.00379893	0.00230695	0.00218538	0.00810025	0.00332586	0.0046429	0.0054859	0.0119064	0.00518388	0.00543983	0.0163842	11.7919	0.00520078	0.00371401	0.00115255	0.0896471	0.0030482	0.00166726	0.00329963	0.00267498	0.00947184	0.00523301	0.008885	0.00603797	0.00568592	0.00445084	0.0026495	0.00232462	0.00525219	0.00807917	0.0501724	0.00272958	0.0028623	0.00267794
ENSG00000185247	MAGEA11	0.015733	0.00351712	0.00516014	0.0102154	0.00231944	0.00628601	0.0135744	0.0599887	0.0108219	0.221836	0.0167235	0.00714371	0.00279651	0.00858502	0.0102951	0.19821	0.00285933	0.00692285	0.207352	0.00254522	0.00448128	0.00771292	0.00475807	0.01378	0.0108593	11.0152	0.00858044	0.105945	0.0041452	0.00663772	0.0254435	0.0021164	0.0137097	0.108952	0.00432534	0.00815868	0.00337713	0.00615697	0.00392144	0.00655868	0.00349874	0.00795608	0.00760309	0.0132839	0.0193622	0.00233987	0.0131645	0.00215645
ENSG00000185686	PRAME	0.106632	0.131027	0.0988533	0.177896	0.0904616	0.217027	1.72919	0.326131	0.157814	0.143656	0.0935004	0.0575807	3.39282	0.18867	0.102855	0.195484	0.0434511	0.0970846	0.0637589	0.0564112	0.0673211	0.126472	0.345824	0.208734	0.201388	163.155	0.256722	0.201707	0.113021	0.240055	0.0800509	0.130653	0.0720178	0.492402	0.364705	0.0921457	0.0706394	0.102845	0.0626141	0.184643	0.587094	0.0655001	0.0439968	6.9903	0.199631	0.0610075	0.196775	1.33924
ENSG00000185825	BCAP31	248.49	39.1399	134.188	155.688	68.4447	235.258	183.363	170.165	214.642	181.34	135.594	103.763	180.241	185.054	167.052	141.791	63.9473	128.816	183.257	127.869	101.868	121.818	122.528	115.72	167.118	168.25	158.119	181.18	44.5164	71.7414	182.755	141.669	155.054	86.6997	142.907	126.853	93.4763	93.3142	87.3838	100.137	95.8021	80.1193	101.902	144.225	76.3835	68.9908	94.1337	100.295
ENSG00000186007	LEMD1	0.0238238	0.0235296	0.0336896	0.0543503	0.0513509	0.11493	0.333065	0.70393	0.571194	0.285161	2.67946	0.323967	0.257631	1.64596	0.564214	0.0665283	0.0462708	0.0946122	0.977103	0.0727994	0.782497	0.0695215	0.164274	0.0857249	0.402798	105.416	0.0619951	0.43252	0.0116974	6.61508	0.0351989	0.0118546	0.0600851	0.0434039	1.11878	0.336759	0.279387	0.287482	0.233089	0.643939	0.232881	0.0870059	0.200526	1.12022	7.03251	0.0188379	0.468371	0.8308
ENSG00000186281	GPAT2	6.66732	2.52369	3.01719	5.05356	2.22566	9.70466	4.69719	3.25971	8.06685	1.65999	3.55994	1.92829	0.754225	4.01233	2.49352	7.46321	1.1484	6.39031	1.25972	5.62835	2.78483	3.89796	4.39043	3.18562	2.52627	16.8875	6.71609	2.0451	4.70336	1.22331	5.68871	0.679033	3.77961	3.75829	1.24157	1.81391	3.69623	2.23517	2.37916	1.1488	2.90219	1.26159	1.295	2.88415	1.10782	0.61588	1.32835	1.07759
ENSG00000187537	POTEG	0.0366675	0.0104557	0.118967	0.0803414	0.0466801	0.0310205	0.0699213	0.0455766	0.0330604	0.0215119	0.0201487	0.0107652	0.0137361	0.0237506	0.0437329	0.0339176	0.00784606	0.0728456	0.030626	0.0683819	0.0360734	0.0802805	0.0445483	0.0432959	1.52213	2.03242	0.0330839	0.0215929	0.0376448	0.00980988	0.0629301	0.0515145	0.0872234	0.123941	0.0129995	0.0124213	0.00815317	0.0109259	0.00625207	0.00667012	0.0166538	0.00789268	0.0101154	0.027935	0.00957495	0.00777102	0.00912288	0.0124011
ENSG00000187601	MAGEH1	32.4051	7.59773	54.307	57.7049	20.7577	33.1432	65.4789	35.0749	33.9662	13.3084	19.4917	58.0672	28.7809	50.0997	45.6685	34.3468	16.0002	30.8009	10.292	37.8221	33.2051	36.9371	29.7869	25.6215	44.2592	77.3022	62.3089	13.5301	10.6024	73.8201	47.9592	3.40882	81.2887	29.1679	101.896	77.7596	41.4113	52.1944	36.5521	86.2311	53.645	48.9123	56.3027	55.9737	84.0669	10.4373	45.5153	19.299
ENSG00000188219	POTEE	0.103376	0.233053	0.35437	0.223919	0.0448585	0.0917126	0.22608	0.107187	0.112458	0.0524572	0.0704012	0.0404551	0.0462422	0.0636855	0.13785	0.0898386	0.017459	0.259415	0.0976525	0.223592	0.110993	0.252137	0.111674	0.151185	0.411614	2.10978	0.0913111	0.0660941	0.0468513	0.0379873	0.256384	0.171622	0.236813	0.41504	0.0474754	0.0387191	0.0329248	0.038077	0.0246498	0.0329332	0.054659	0.0329529	0.0301752	0.0897309	0.0388943	0.0241272	0.025844	0.0356246
ENSG00000188408	MAGEB5	0.00154632	0.000979128	0.000769849	0.000652167	0.000532587	0.00345933	0.000397113	0	0.00236357	0.000786424	0.0563289	0.00154286	0.000787829	0.00136714	0.000641107	0.000541743	0.00336451	0.00127099	0.000668054	0.00014824	0.00364109	0.00112641	0.000289358	0.000387512	0.000945796	2.25958	0.00169877	0.00122294	0.000409514	9.24481e-05	0.00032623	8.61457e-05	0.00077625	0.000560345	0.000509505	0	0.000184228	0.000154187	0.000230683	0.000316139	0.000287673	0.00144426	0.00037267	0	0.00078986	0.00184071	0	0.000767765
ENSG00000188877	POTEA	0.00110808	0.00153155	0.00134528	0.00145179	0.000847147	0.000802884	0.00224275	0.0025884	0.00279728	0.00194882	0.00114586	0.00165956	0.00122814	0.00293853	0.0016881	0.000980664	0.000796655	0.00383509	0.00127928	0.00133872	0.00183841	0.0015826	0.00182561	0.00105756	0.00656539	4.77614	0.0020826	0.00127542	0.000685833	0.00165515	0.00190001	0.0011835	0.00155301	0.00237161	0.00258749	0.00082001	0.000426463	0.000853976	0.000483337	0.000671436	0.000178113	0.000605838	0.00150781	0.00199383	0.00224367	0.00128997	0.000463928	0.000447282
ENSG00000188992	LIPI	0.103396	0.011604	0.126752	0.137926	0.048723	0.147369	2.08068	0.594309	0.144178	0.0515727	0.145628	0.0665558	0.0286478	2.54021	0.0531908	0.042465	0.0303464	0.184972	0.578012	0.23805	0.18318	1.40167	0.163933	0.536999	0.143158	0.291107	0.378655	0.0558049	0.0174208	0.526193	0.107101	0.00251425	0.0834909	0.413486	0.0688046	0.0775966	0.049011	0.0717444	0.0307202	0.0558045	0.0797481	0.042093	0.0555112	0.405131	0.398683	0.0103692	0.0180422	0.0217518
ENSG00000189064	GAGE2A	0.0083316	0.00938276	0.00687249	0.00629588	0.00475131	0.00982619	0.0202251	0.0252603	0.0117499	0.00939487	0.00566	0.00370404	0.00876857	0.0222442	0.0071019	0.00807411	0.00452899	0.0205707	0.00844712	0.0088116	0.00878446	0.00549828	0.015946	0.00974773	0.0265646	36.2239	0.00831464	0.0121416	0.00466979	0.0172099	0.00858609	0.00646221	0.00950991	0.00954897	0.0158758	0.00707301	0.00778854	0.0113023	0.0063178	0.00716876	0.00254899	0.00375848	0.0161663	0.0211894	0.0118221	0.00402164	0.00113122	0.00376647
ENSG00000189252	SPANXN3	0.0143958	0.0533327	0.0106999	0.022206	0.0120464	0.0126422	0.0139277	0.00672481	0.0568667	0.0146385	0.00880741	0.0151456	0.0707871	0.0286884	0.00618784	0.00859647	0.00812131	0.0444746	0.00919625	0.00437093	0.0078383	0.0134916	0.0352613	0.00951958	0.0853592	90.2244	0.0109884	0.0137495	0.00548764	0.0141817	0.00909044	0.00376166	0.0170325	0.00579167	0.0145381	0.016599	0.00699207	0.0103647	0.00420839	0.018708	0.00568075	0.0110138	0.0253586	0.0133629	0.0160357	0.0184508	0.0334461	0.0147901
ENSG00000189326	SPANXN4	0.00209632	0.00356724	0.00187339	0.00244262	0.00135357	0.00273564	0.00520775	0.00603654	0.0189342	0.00387366	0.00256969	0.00276576	0.00299981	0.00904349	0.00594609	0.00629967	0.00217622	0.01117	0.00360784	0.00303277	0.00250922	0.00424941	0.00476235	0.00351658	0.0197891	27.6526	0.00267863	0.00319391	0.00105516	0.00494137	0.0022753	0.0049005	0.00168539	0.000420977	0.00276254	0.00234187	0.000331138	0.00117061	0.00033639	0.00190054	0.00106572	0.0192018	0.0160929	0.00226033	0.000294512	0.00290124	0.000699424	0
ENSG00000196406	SPANXD	0.00509768	0.00938029	0.00972348	0.00974521	0.00219702	0.00592329	0.00973768	0.00474673	0.0200006	0.00755199	0.00458716	0.00571141	0.00310829	0.0108684	0.00484166	0.00320253	0.00293841	0.021251	0.00289095	0.00691115	0.00509368	0.00600413	0.0047893	0.0054797	0.0215303	33.2197	0.00659189	0.00697485	0.00192507	0.00636871	0.0167635	0.00189033	0.0223525	0.00294213	0.00888431	0.0043689	0.00454459	0.00575447	0.00232659	0.00304223	0.00475157	0.00503797	0.00565114	0.0024705	0.00329372	0.00765473	0.00372475	0.00156718
ENSG00000197172	MAGEA6	0.00873926	0.0106825	0.0134187	0.00935728	0.00472846	0.0125233	0.0183511	0.0248477	0.00690429	0.0122695	0.00582006	0.00813911	0.00561368	0.0157063	0.00901841	0.00962776	0.00511783	0.00819177	0.00696959	0.00513045	0.00473836	0.00504282	0.00678134	0.00630042	0.0171659	11.552	0.0217616	0.0127506	0.0049286	0.0110634	0.00708321	0.00923612	0.0130147	0.0232753	0.0136565	0.0111883	0.00462477	0.0096709	0.00481638	0.00939965	0.00611258	0.0117908	0.0103675	0.0110906	0.00961312	0.00547049	0.00377432	0.00386084
ENSG00000197181	PIWIL2	2.2384	2.01582	2.29194	1.46845	0.580015	1.11198	2.85664	1.97977	2.21235	1.20194	1.29941	0.496728	0.215698	1.20229	0.758095	0.691651	1.83075	0.999786	0.249667	1.05111	0.938636	1.83806	1.18104	1.09018	1.81366	39.5202	4.78959	1.40502	0.220655	1.5947	1.21661	0.0707443	1.55399	0.106535	3.07466	0.479869	0.666506	0.859099	0.5754	1.38151	0.693731	0.658018	0.445965	3.3709	1.88966	0.637929	0.794651	0.358498
ENSG00000197279	ZNF165	0.81214	0.326726	1.04029	1.03147	0.357822	0.710333	1.95989	2.52371	2.54011	1.96	4.05117	1.06647	1.29022	4.1922	3.99868	1.71134	3.88172	1.12696	3.98229	1.11357	3.35817	1.52113	3.12179	2.82789	2.5376	46.2898	1.51711	1.73747	0.327776	1.38131	0.881309	0.188465	0.986235	3.69879	8.73649	1.24268	1.0279	1.15594	0.8535	1.34339	0.646915	0.694345	0.820484	1.53125	1.51581	2.13523	0.796306	5.15016
ENSG00000198021	SPANXA1	0.000308492	0.00019726	0.000556652	0.00030125	0	0.00084183	0	0	0.000313159	0.000339487	0	0	0.000164341	0.000289663	0.000228114	0.000210705	0.000218963	0.000238699	0.000128378	0.000321867	0.000328942	0	0	0.000334458	0.000270898	0.40096	0.000292488	0	0	0.000177137	0	0	0.00115289	0	0.000721343	0.00019512	0	0.000576829	0.000341854	0	0	0.000299797	0	0	0.000179814	0	0	0
ENSG00000198062	POTEH	0.00240005	0.00194953	0.00169753	0.00135837	0.00088359	0.00156863	0.00394493	0.0219947	0.00814571	0.00263452	0.00254814	0.00257369	0.00221585	0.00391734	0.00312886	0.00823407	0.00226608	0.00460736	0.00393371	0.00249228	0.00223267	0.00138871	0.0141565	0.0035313	2.95426	2.6989	0.00204231	0.00164074	0.000901829	0.00119075	0.00453357	0.00161023	0.00449248	0.0166906	0.00425512	0.00222167	0.00132902	0.000813598	0.000386537	0.00143312	0.00231415	0.00149226	0.00229291	0.00318639	0.000600512	0.00184934	0.00114871	0.00188091
ENSG00000198573	SPANXC	0.00316341	0.00260669	0.0134816	0.0102177	0.000657343	0.0227223	0.0088338	0.00063859	0.00633383	0.0063502	0.00745093	0.00351957	0.00365035	0.0146068	0.00481522	0.000553527	0.00175985	0.00706431	0.00515279	0.00261109	0.00630476	0.0046756	0.00157043	0.00264968	0.0279056	21.8808	0.00667942	0.00445625	0.00155051	0.00511369	0.0407637	0.000863603	0.0293472	0.00702943	0.00427247	0.00306646	0.00212577	0.00407951	0.00245239	0.00670876	0.00709396	0.00594528	0.00862398	0.0100828	0.00544693	0.00509398	0.00795647	0.000600118
ENSG00000198681	MAGEA1	0.00660502	0.00764788	0.0109152	0.010251	0.00470678	0.0131796	0.00777246	0.0089834	0.0109646	0.00563419	0.00499883	0.00600153	0.009325	0.0134325	0.00821237	0.0040266	0.0053754	0.0102908	0.00530054	0.00617477	0.00558565	0.00642005	0.00497824	0.00543606	0.0125803	11.174	0.0116511	0.00640148	0.00350396	0.00992604	0.00860976	0.00763939	0.0145422	0.0587982	0.032748	0.00886115	0.00350659	0.00436379	0.0032208	0.00570209	0.00622428	0.00612819	0.00515403	0.014222	0.012013	0.00486527	0.0052059	0.00265588
ENSG00000198707	CEP290	6.29988	1.54895	6.8892	7.44358	2.86634	6.33383	14.676	7.53753	6.79619	4.33371	3.95153	5.93982	4.64468	11.8219	7.4894	5.63945	2.25684	6.73048	2.508	6.95727	4.63283	8.04738	5.79384	5.40858	9.53974	11.6776	14.5397	4.13456	1.68724	10.1549	12.0753	0.357083	6.58466	10.1304	10.9972	4.87307	3.78467	3.8209	3.13924	4.82693	6.50841	3.83353	3.67106	18.5216	8.81803	1.70168	4.21666	4.35762
ENSG00000198765	SYCP1	0.161814	0.00839074	0.0195953	0.028552	0.00550568	0.142566	0.0169612	0.0125496	0.119028	0.0728666	0.130703	0.00405278	0.0121438	0.0220916	0.008907	0.00977784	0.00350707	0.069185	0.0127044	0.0334644	0.00936005	0.00882815	0.0135654	0.00810823	0.0391363	50.0049	0.026219	0.0864332	0.00315866	0.117951	0.00583476	0.00222907	0.0121048	0.00950664	0.0109037	0.00400386	0.00542744	0.00374938	0.0044008	0.010669	0.00660511	0.00627098	0.00477302	0.0127015	0.0633619	0.0165315	0.0039893	0.0145827
ENSG00000198798	MAGEB3	0.00225426	0.00173099	0.00152953	0.00149017	0.000790319	0.00128608	0.00399254	0.0034191	0.00322619	0.00211758	0.00218179	0.00457028	0.0192791	0.00328529	0.00172613	0.00136564	0.000826149	0.00358837	0.00132894	0.00103493	0.00143719	0.00162064	0.00352508	0.00136488	0.00508486	8.44888	0.0160097	0.00226145	0.000511919	0.0192807	0.00129484	0.00118404	0.000890301	0.00656063	0.00319781	0.00285474	0.00233376	0.00328659	0.00187509	0.0047752	0.00499044	0.00556086	0.00348466	0.00391039	0.0130142	0.0010915	0.00589439	0.000676753
ENSG00000198876	DCAF12	20.726	13.4429	15.3695	18.7366	8.24646	21.7214	25.0649	30.6988	21.3584	21.3367	21.8142	7.24647	40.3617	24.4525	24.7131	23.7433	9.30624	14.2953	38.8804	14.798	13.7709	15.6535	15.9366	17.2814	21.1854	73.1947	22.6748	22.0884	6.03708	13.3626	23.4489	68.4867	17.5224	47.8878	18.4785	8.30789	7.49601	7.07337	5.7333	8.26172	9.74565	6.33584	7.17448	25.362	14.4994	9.53029	7.03909	11.6335
ENSG00000198930	CSAG1	0.00949629	0.05131	0.00867756	0.0107288	0.00546746	0.0221759	0.0917837	0.0135586	0.00486523	0.00490993	0.00880148	1.14342	0.00416295	0.319355	0.0163772	0.0409722	0.0248874	0.0642996	0.025869	0.0650293	0.0572375	0.0271807	0.210374	0.0359946	0.131142	2.5061	0.0121183	0.00586843	0.0218604	0.541152	0.0084454	0.0061054	0.00902095	0.0347278	0.018681	1.34423	1.35356	0.940513	1.2236	0.859123	0.489337	1.07415	1.24985	0.0131282	0.544292	0.0168726	1.13974	0.0224173
ENSG00000203923	SPANXN1	0.000704404	0.00156592	0.000283017	0.00108687	0.00069035	0.00418948	0.00195662	0.00221237	0.0024029	0.00108331	0.000699198	0.00203525	0.00102093	0.00175862	0.00413457	0.00131568	0.0009275	0.00283757	0.00127191	0.000901493	0.00108479	0.00116075	0.0019416	0.00128635	0.00165171	3.48736	0.00132719	0.000950371	0.000415486	0.00125187	0.00267246	0.000377616	0.00245819	0.00125034	0.000839046	0.00140828	0.00405976	0.0028889	0.00101044	0.00226238	0.00126736	0.00252904	0.00609767	0.00290222	0.000828233	0.00220403	0.00689165	0.000513412
ENSG00000203926	SPANXA2	0.0014184	0.000406314	0.0284855	0.0161179	0.000775524	0.0030914	0.00379296	0.00182096	0.00144571	0.000615911	0.00252852	0.0060089	0.000720271	0.0027366	0.0025519	0.000238797	0.000221799	0.00163006	0.00035827	0.00052792	0.00104125	0.000949812	0.00061861	0.000730246	0.00263224	0.630319	0.00271855	0.00132128	0.000140718	0.00257598	0.00507208	0.000421497	0.0418157	0	0.00365724	0.00711316	0.00608126	0.00849313	0.00498644	0.0100263	0.010993	0.00759492	0.007335	0.00186656	0.000652	0.000155133	0.00855338	0
ENSG00000204019	CT83	0.0166109	0.0205784	0.0131018	0.0135096	0.00867142	0.0212667	0.0342265	0.0825146	0.143072	0.0242616	2.49858	0.00508792	0.0132424	0.0814631	0.115777	0.00727759	0.0222245	0.050944	0.041982	0.00921	0.0657934	0.0160332	0.0444971	0.0240053	0.11133	111.513	0.0118913	0.0450885	0.00277625	0.0122936	0.0262648	0.00399432	0.0210048	0.00803057	0.0478596	0.000371388	0.00145447	0.00259354	0.00224127	0.00210386	0.00324428	0.000575127	0.00357301	0.0221878	0.00623888	0.0141785	0.00312489	0.0465666
ENSG00000204179	PTPN20	0.412463	1.50627	1.18544	1.62004	2.29886	0.323412	0.827973	1.01373	1.43483	2.34999	0.840649	1.828	3.90395	1.17625	0.640616	1.0334	1.42331	1.21218	1.89714	1.16487	0.672769	0.5113	0.507345	0.547019	1.08144	9.05054	0.813604	2.63732	2.25895	5.81538	0.619181	0.0268837	2.7472	0.282329	3.24998	3.40324	1.92982	2.19878	1.43288	4.19366	1.74261	1.38917	2.6025	2.02819	7.95491	0.19502	2.87986	1.41817
ENSG00000204363	SPANXN5	0.00698982	0.00677748	0.00465947	0.00600483	0.00125923	0.00640213	0.011716	0.00854468	0.0272606	0.0248724	0.00833938	0.00330922	0.00394651	0.0153501	0.00597	0.00440585	0.00398543	0.0248682	0.0150594	0.00252867	0.00440323	0.00505097	0.00583775	0.00863768	0.0322799	37.0166	0.00455599	0.0168719	0.00177337	0.0044178	0.0113243	0.00221056	0.006894	0.0104402	0.00731728	0.00208311	0.00242045	0.00156305	0.000818098	0.00308416	0.000659434	0.00374447	0.00492864	0.00750161	0.00455684	0.00572451	0.0030041	0.00185871
ENSG00000204379	XAGE1A	0.00257624	0.00151091	0.003503	0.00192504	0.00112571	0.00121567	0.00464106	0.00100295	0.00272902	0.00267647	0.00223728	0.00191176	0.00194787	0.00392337	0.00506125	0.00181295	0.00186567	0.00223664	0.00225533	0.00289469	0.00188649	0.00197952	0.00246422	0.00236488	0.00307127	0.0838635	0.00371351	0.00316977	0.00116322	0.00523776	0.00232062	0.00195385	0.00316856	0.00214839	0.00565502	0.00278469	0.00265508	0.00211402	0.00169505	0.0033532	0.00162396	0.00158665	0.00063858	0.00602478	0.00389251	0.000618319	0.00158353	0.00123553
ENSG00000204382	XAGE1B	0.00221428	0.0015907	0.00398362	0.00317146	0.00163149	0.00160845	0.00569324	0.00432532	0.00589076	0.00178455	0.0092716	0.00315522	0.00325988	0.00321979	0.0135924	0.00337378	0.00137558	0.00270606	0.00169081	0.00205013	0.00140462	0.00321466	0.00294567	0.00208116	0.0033358	0.110115	0.00284491	0.00395646	0.0011588	0.00588369	0.00187317	0.00114705	0.0030156	0.00217218	0.00546463	0.00279813	0.0016978	0.00302325	0.000994634	0.00417427	0.00268491	0.00211223	0.00236784	0.00338483	0.00494753	0.00110558	0.00112194	0.000815059
ENSG00000205359	SLCO6A1	0.0161737	0.00871585	0.0202415	0.0308883	0.0149776	0.0102391	0.00907007	0.0200213	0.0360628	0.0153845	0.0163371	0.00410344	0.0151526	0.0286777	0.0122248	0.00905759	0.00399422	0.019797	0.0431687	0.0100701	0.00573435	0.00979507	0.0106074	0.00800541	0.0571764	41.8582	0.00856854	0.0205261	0.00675615	0.00839224	0.00680288	0.00257627	0.108911	0.00463504	0.0111958	0.00312462	0.00642439	0.00349094	0.0100041	0.0115787	0.0312555	0.0112452	0.0028379	0.00751556	0.00611298	0.00623794	0.0157911	0.0199306
ENSG00000205777	GAGE1	0.00295011	0.00317264	0.00362032	0.00238066	0.00133262	0.00383225	0.00336951	0.00330892	0.00305079	0.00222047	0.00142721	0.0022449	0.00219394	0.00467857	0.00317098	0.00238162	0.000709366	0.00343225	0.00192304	0.00214277	0.00159889	0.00197504	0.00209907	0.00164615	0.00357424	2.38321	0.0049743	0.00283453	0.0017838	0.00543779	0.00128184	0.00330314	0.00304441	0.00582253	0.00388204	0.00284317	0.002151	0.00274775	0.002705	0.00381391	0.00234101	0.00156977	0.00294305	0.00320667	0.0053908	0.00171931	0.00157548	0.00196324
ENSG00000212710	CTAGE1	0.0108899	0.0106861	0.0217878	0.0969402	0.0488871	0.0375876	0.0234736	0.0208769	0.0257641	0.0103738	0.0190176	0.00565787	0.0197296	0.0260853	0.0155729	0.0106405	0.0107198	0.01435	0.0160086	0.00878623	0.014915	0.0103685	0.0248168	0.0138963	0.0258412	25.5911	0.0101354	0.00974473	0.00692828	0.00742826	0.0236832	0.00937522	0.0653233	0.0127061	0.013402	0.00515267	0.00424442	0.00537703	0.00419757	0.00765044	0.00829003	0.007581	0.00630276	0.0210466	0.00672102	0.0289092	0.0090394	0.0130988
ENSG00000213401	MAGEA12	0.00822602	0.0203356	0.00684066	0.00716883	0.00312753	0.0139084	0.0535524	0.0107064	0.00772521	0.00765566	0.00687062	0.302173	0.00701124	0.0128044	0.0109419	0.00773627	0.00965695	0.0229258	0.0080971	0.0188556	0.0189235	0.00901566	0.0359422	0.012008	0.0512342	6.09176	0.0114844	0.00743161	0.00801395	0.145916	0.0123902	0.00788061	0.00840748	0.0183657	0.00911611	0.370946	0.36307	0.241783	0.355692	0.20625	0.116932	0.232123	0.300176	0.0136305	0.142511	0.0044389	0.266841	0.00729516
ENSG00000214107	MAGEB1	0.0053895	0.0067816	0.00894167	0.00445767	0.0037715	0.00916621	0.0142149	0.0210298	0.0197167	0.00863531	0.00418272	0.00394243	0.00561981	0.0149396	0.0054667	0.00358726	0.00312533	0.0095604	0.00429757	0.00620571	0.00418067	0.00452306	0.011244	0.00527641	0.0296703	32.6571	0.00870299	0.00643078	0.00309689	0.00727149	0.00485698	0.00510959	0.00409877	0.0514035	0.0108304	0.00400388	0.00213524	0.00374175	0.00282668	0.00326861	0.00368044	0.00283332	0.00276358	0.0185809	0.00723833	0.00599169	0.00251475	0.00460647
ENSG00000215269	GAGE12G	0	0	0	0	0	0	0	0	0	0	0	0	0	0	0	0	0	0	0	0	0	0	0	0	0	0.00515812	0	0	0	0	0	0	0	0	0	0	0	0	0	0	0	0	0	0	0	0	0	0
ENSG00000221867	MAGEA3	0.00992551	0.012015	0.0133447	0.0119316	0.00555383	0.0171396	0.0107828	0.0139427	0.00883052	0.00861108	0.00533389	0.00782522	0.00494775	0.0192503	0.0107118	0.00816062	0.00503143	0.013103	0.0067596	0.00457277	0.00580646	0.00674469	0.00597235	0.00582587	0.0171406	13.4899	0.0133608	0.0115601	0.0045088	0.0132706	0.0108825	0.0113355	0.0148086	0.0351772	0.0187632	0.00863756	0.00656062	0.00738402	0.00445001	0.00854384	0.00619918	0.00915335	0.0146944	0.0115802	0.0165718	0.00463327	0.00324048	0.00489691
ENSG00000226023	CT47A6	7.92459e-05	6.27771e-05	0	0	5.56177e-05	0	0	0	8.62963e-05	0	0	0	0.000118605	0.000252266	0	0.000131618	0	0.000235689	0	0	9.95543e-05	0	0	0.000217512	0	0.0413871	0	4.72896e-05	0	0	0.00012873	0	0	0	0	0	0	8.38211e-05	0	0.000127178	0	0	0	0.000539889	0	0.000535265	0	0
ENSG00000226685	CT47A12	0	0	0	0	0	0	0	0	0	0	0	0	0	0	0	0	0	0	0	0	0	0	0	0	0	0	0	0	0	0	0	0	0	0	0	0	0	0	0	0	0.000250314	0	0	0	0	0	0	0
ENSG00000227234	SPANXB1	0.030183	0.0351585	0.0292384	0.0570575	0.0275873	1.32186	0.0383356	0.0260124	0.0960816	0.0424209	0.0368698	0.0294051	0.0203649	0.0565242	0.0262742	0.024131	0.0153603	0.05582	0.0185945	0.0179664	0.0276919	0.022932	0.0269456	0.0231844	0.0955289	140.637	0.0898995	0.034248	0.00627692	0.0274577	0.0769161	0.010393	0.0847407	0.0382575	0.0494909	0.0400706	0.00846093	0.0136836	0.00657044	0.0215353	0.0110268	0.016612	0.0486713	0.10304	0.0154984	0.0395477	0.0174884	0.0965436
ENSG00000228517	CT47A7	0	0	0	0	0	0	0	0	0	0	0	0	0	0	0	0	0	0	0	0	0	0	0	0	0	0.000218227	0	0	0	0	4.68254e-05	0	0	0	0	0	0	0	0	0	0	0	0	0	0	0	0	0
ENSG00000228836	CT45A5	8.62443e-05	0	0.000143771	0	0.000228648	0.000148725	0.00019007	0	0.000405664	0	0.000183457	0.00214471	0	0.00028513	0.000474913	0	6.49695e-05	6.09515e-05	0.000122757	0	0.000274875	0	0	0.000154704	0.00116963	0.212146	0.000204798	0.00010428	6.06944e-05	0.00103174	0	6.73907e-05	0	0.00724253	0.0128029	0.00163746	0.00598122	0.00723915	0.00344937	0.0133084	0.010006	0.00762508	0.00363449	0.000659333	0.000812465	0	0.00275511	0
ENSG00000228927	TSPY3	0	0.000151009	6.96531e-05	0	0	0	0.000349577	0.000461923	0.000105403	8.38079e-05	0.00023179	6.63922e-05	0.000101395	0.000149908	4.46367e-05	0	0	0.000270874	8.95495e-05	0	0.000106212	0	0	0.000289187	0.00115159	0.643391	7.36026e-05	0	4.75463e-05	0	0.000257421	5.5298e-05	0	0	0.000642403	0	0	0	0	9.93069e-05	0	0.000123655	0.000175625	0.000318389	0	0	0	0
ENSG00000233917	POTEB	0.000683428	0.000260174	0.00063368	0.000550167	0.000303014	0.000678503	0.000761056	0.00086891	0.000867778	0.000447449	0.00131321	0.000465408	0.000150426	0.00104904	0.000782839	0.000908851	0.000302159	0.00072668	0.000192973	0.000594427	0.000475376	0.000574252	0.000541765	0.00091469	0.000385771	0.0294823	0.000728433	0.000448802	0.000220507	0.0013373	0.0005475	0.000262306	0.000324051	0.000670207	0.00050159	0.000262488	0.000725959	0.000195707	0.000105659	0.000533218	0.000342327	0.00052066	0.000259585	0.000855167	0.000882047	0.000301726	0.000266187	9.32588e-05
ENSG00000236371	CT47A1	5.42534e-05	0	0	0	0	0	0	0	0	5.59603e-05	0	0	0	0	0	0	0	0	0	0	0	0	0	8.59852e-05	0	0.00263701	0	0	0	0	9.29563e-05	0	0	0	0	0	0	0	0	0	0	0	0	0	0	0	0	0
ENSG00000236424	TSPY10	0.000139382	0.000227895	0	0.000284667	5.56876e-05	7.79667e-05	0.000921268	0.000282885	0.000753725	6.80464e-05	0	0.000619569	0.000234225	0.000442864	0.000199896	0	0.000197561	0.000209709	0.000318414	0	0.000114345	0.00026429	0	5.4335e-05	0.00177702	1.5556	0.00010084	0.000172154	1.65463e-05	0	0.000103135	3.12053e-05	0.000298009	0	0.000203958	0	0.00011252	0.000155528	0	0.000149455	0	0	0	0	0	0.000443717	0	0
ENSG00000236446	CT47B1	0.00260825	0.00198126	0.00174994	0.00298758	0.0027272	0.00242351	0.0120167	0.00591917	0.00536484	0.00259877	0.00349278	0.00255094	0.00453318	0.00494075	0.00312784	0.00214913	0.00281415	0.00683041	0.00246968	0.00277805	0.00306501	0.00126609	0.00464187	0.00193845	0.00729947	14.5308	0.00363981	0.00263518	0.001135	0.0011039	0.0143776	0.00127872	0.00395278	0.00359374	0.0027011	0.00194512	0.00262089	0.00187687	0.00126571	0.000870743	0.000272893	0.00193198	0.00232693	0.00610933	0.0019713	0.00740066	0.000631727	0.00196153
ENSG00000241476	SSX2	0.0015489	0.00119707	0.00235038	0.00154842	0.000799907	0.00107301	0.00275148	0.00233038	0.00106425	0.00123589	0.000979198	0.00100027	0.00122101	0.0417674	0.00195076	0.00150021	0.00100826	0.00178134	0.00122683	0.00139448	0.00163103	0.00121346	0.0011277	0.00123123	0.00224706	0.165625	0.00240921	0.00185002	0.000568241	0.00275257	0.00188964	0.000606265	0.00160551	0.0012258	0.0035735	0.000905215	0.00128118	0.00136312	0.0010775	0.00138614	0.000746038	0.000831066	0.00112659	0.00207022	0.001612	0.000482389	0.000528561	0.00120059
ENSG00000241697	TMEFF1	2.02773	1.29062	5.59314	3.9318	1.31622	2.1907	5.1055	3.06487	1.79824	0.68846	0.921672	19.6623	1.02436	6.78743	2.80334	0.560757	0.358259	3.98563	0.926732	3.62302	1.93498	5.68825	1.81942	2.80183	2.67719	12.5013	3.48531	0.693616	0.753901	13.1949	6.5701	0.096212	4.96419	0.635055	2.05602	35.7681	30.9894	28.3875	30.7216	36.1219	55.2559	34.1264	28.9563	3.55483	19.1135	0.415249	32.9639	0.897588
ENSG00000258992	TSPY1	0.00052635	0.000296314	0.000416259	0.0012755	0.000192867	0.000173808	0.00140775	0.00526404	0.00108808	0.000119917	0.000397654	0.00022949	0.000592713	0.00131871	0.000309048	0.000142863	0.000428476	0.000532427	0.000386216	0.00084696	0.000660028	0.000892815	0.000464706	0.000323793	0.00377673	4.40446	0.00105299	0.000684679	3.71528e-05	0.000639336	0.000644365	0	0.000936019	0.000133276	0.00221693	0	0.000119593	9.39024e-05	0.000239561	0.00040698	0	0.000293503	0	0.00103789	0.000408744	0.000367611	0.000550288	0.00163647
ENSG00000260325	HSPB9	0.552841	0.225783	0.246155	0.406969	0.204453	0.629612	0.755446	0.631969	0.588507	0.44002	0.505796	0.38878	0.430179	0.64874	0.698292	0.985191	1.04215	0.615864	0.376172	0.624613	0.614571	0.72885	0.588847	0.461298	0.840031	35.0517	0.672864	0.450721	0.143604	0.685858	0.210095	0.599306	0.364874	0.314937	1.20114	0.369332	0.409948	0.459295	0.363626	0.410744	0.412138	0.27666	0.285515	1.25609	0.611283	2.56615	0.308408	0.534926
ENSG00000267978	MAGEA9B	0.00200097	0.00225372	0.00404792	0.003791	0.00261982	0.00161543	0.00335521	0.00204692	0.00422891	0.00317377	0.00254327	0.00623027	0.00138341	0.00572776	0.00382708	0.0060873	0.00101939	0.0040866	0.00202705	0.00339251	0.00260487	0.00280952	0.0038407	0.00228841	0.00529935	3.37117	0.00377354	0.00353278	0.00116619	0.00754784	0.000879563	0.00170079	0.00353326	0.00720626	0.00375396	0.00468177	0.00428089	0.00561317	0.00309723	0.00497026	0.0011783	0.00399545	0.00648781	0.00398617	0.00701609	0.00117217	0.00252669	0.001874
ENSG00000268009	SSX4	0.00156097	0.00079411	0.00200014	0.00230554	0.00110301	0.00136248	0.00137923	0.00200135	0.00145993	0.00165416	0.000803704	0.00103475	0.00106337	0.00531714	0.00194913	0.00121286	0.00073878	0.00115171	0.00134114	0.0017588	0.00113721	0.00202552	0.00108829	0.000995328	0.00260249	0.0319873	0.0024238	0.00150098	0.000804072	0.00131369	0.00115812	0.0017316	0.00116134	0.000695862	0.00109329	0.0016844	0.00133858	0.00112537	0.000676	0.0019448	0.00233358	0.00137081	0.000821818	0.00309006	0.00162047	0.000849469	0.00132245	0.000318353
ENSG00000268447	SSX2B	0.00151297	0.00100439	0.00198005	0.00177658	0.000809033	0.000980924	0.00288197	0.0017109	0.00144283	0.00140065	0.000922056	0.00163656	0.00138485	0.00750322	0.00157605	0.0016081	0.000512128	0.00136148	0.000822721	0.00150093	0.00094507	0.000903512	0.00147016	0.000853249	0.00114453	0.135615	0.00169864	0.00167839	0.000690282	0.00243689	0.00115534	0.000885013	0.00132609	0.00131757	0.00183657	0.00156093	0.00139803	0.00126571	0.000734634	0.00222416	0.00174925	0.00149241	0.000564625	0.00273356	0.00256423	0.000617389	0.000705137	0.000438706
ENSG00000268606	MAGEA2	0.00151053	0.000478889	0.00409633	0.00558295	0.000943469	0.00128007	0.00140303	0.00267462	0.00125314	0.000989816	0.000823086	0.00124385	0.00114393	0.00118359	0.00181527	0.00106075	0.000304579	0.000548893	0.00100586	0.00068488	0.000395499	0.000760965	0.00155791	0.000884052	0.00139458	0.0707588	0.00120955	0.001536	0.000594868	0.00124493	0.00112907	0.000770232	0.00714184	0.000236149	0.00127354	0.00079933	0.00109747	0.000951264	0.000769224	0.00135488	0.000554566	0.000589071	0.00101099	0.00124461	0.000850977	0.000791265	0.000681799	0.000674318
ENSG00000268651	CTAG1A	0.0228915	0.0113289	0.0817375	0.0625202	0.00933009	0.0162213	0.0477377	0.0313537	0.0215717	0.0195994	0.0099987	0.0139617	0.0109842	0.0184287	0.0284067	0.0178039	0.00746713	0.0573099	0.0153069	0.0691518	0.018393	0.0517257	0.0232181	0.0373203	0.0269916	0.0558213	0.0257707	0.0224538	0.0065138	0.0234832	0.0161916	0.0185801	0.0627456	0.0114942	0.0186341	0.0135179	0.00860797	0.00950053	0.00956718	0.0126557	0.00954327	0.010291	0.0108039	0.0262275	0.0152161	0.00521708	0.00470158	0.00673847
ENSG00000268902	CSAG2	0.00209107	0.00152451	0.00514247	0.00765517	0.00186676	0.00396174	0.00404106	0.0453376	0.0031871	0.0288941	0.00183463	0.0149377	0.00189806	0.00622243	0.0146513	0.184959	0.000372652	0.00226289	0.0021231	0.00199293	0.00125599	0.00289611	0.0157834	0.00354389	0.0486872	0.362268	0.00280893	0.0123128	0.00199343	0.00731552	0.000644921	0.000680411	0.00739986	0.0390411	0.0038253	0.0154154	0.0177327	0.0120701	0.0164052	0.0276081	0.0211409	0.027425	0.0163439	0.00460356	0.00408256	0.00365925	0.0261762	0.0194702
ENSG00000268916	CSAG3	0.00414879	0.004591	0.00618065	0.0087915	0.00460196	0.0104202	0.0179574	0.159515	0.0110754	0.10688	0.00459877	0.0403059	0.0048012	0.0243675	0.0360239	0.919088	0.00103421	0.00570276	0.00804587	0.00469272	0.00428886	0.00668831	0.0957178	0.00788127	0.244623	1.87238	0.01012	0.0558812	0.00720414	0.0158437	0.00235974	0.00241738	0.0115206	0.209878	0.0117268	0.0325765	0.053338	0.0320598	0.0512704	0.080467	0.0761979	0.0947658	0.0292673	0.00850922	0.0108116	0.0319367	0.0999912	0.111957
ENSG00000268940	CT45A1	0.00255118	0.00842908	0.0034963	0.002039	0.00198708	0.00218377	0.00632796	0.00297513	0.00312704	0.00282935	0.00208926	0.0531133	0.00116244	0.00240106	0.0252587	0.0027234	0.00158707	0.0053126	0.00210586	0.00398726	0.00422618	0.00295472	0.00193679	0.00290552	0.00826151	4.08064	0.00341616	0.00184245	0.0034266	0.0253876	0.00242224	0.00146189	0.00295745	0.0218116	0.0181814	0.0496868	0.0990015	0.0932914	0.0572953	0.112795	0.198516	0.134312	0.0928976	0.00518	0.0321574	0.00237288	0.100459	0.00213141
ENSG00000268988	SPANXN2	0.00109339	0.00289469	0.000842896	0.00268525	0.00140709	0.000395545	0.00144155	0.00066859	0.00533606	0.00153959	0.000858333	0.00116835	0.00268105	0.00223538	0.00131137	0.00212286	0.00169616	0.00473666	0.00159798	0.00135643	0.00174602	0.00130062	0.00214979	0.00154608	0.00406776	4.43712	0.00150829	0.000850428	0.000611366	0.00102174	0.00417581	0.00108252	0.002129	0.00144713	0.0014912	0.00191952	0.00077878	0.00157496	0.000616195	0.00189064	0.000627925	0.00141076	0.00616943	0.00160306	0.00353209	0.00111575	0.0102634	0.000977529
ENSG00000269058	CALR3	0.0455457	0.0459974	0.0235201	0.027068	0.0148028	0.0248381	0.0335074	0.026936	0.113205	0.0439456	0.0385167	0.0238848	0.046517	0.0978572	0.0398174	0.0584089	0.0450658	0.0495207	0.0383436	0.0172915	0.0324072	0.0251828	0.0490442	0.0299948	0.151092	132.417	0.0651149	0.0466812	0.0113424	0.0233479	0.0651345	0.024556	0.0284766	0.17627	0.0481271	0.0209726	0.0279409	0.0202319	0.0153169	0.0276428	0.0344999	0.0240021	0.0205573	0.0438324	0.016099	0.0620138	0.0204549	0.032332
ENSG00000269096	CT45A3	0.000376531	0.000718456	0.000600513	0.000570542	0.000304872	0.000202107	0.000912958	0.00053359	0.00146682	0.000275613	0.000265617	0.000852824	0.000468372	0.0010536	0.000462232	0	0.000127317	0.00152979	0.000657027	0.0009828	0.000399554	0.000822708	0.000142674	0.000573054	0.000898408	1.18399	0.000686817	0.000437603	0.00011375	0.00117448	0.00133772	0.000339483	0.00152243	0.00253609	0.00510092	0.00105335	0.00232492	0.00242878	0.00162107	0.00178669	0.00120535	0.00281838	0.00229125	0.0006395	0.000469628	0.000321637	0.0012259	0
ENSG00000269405	NXF2	0.0014541	0.000718174	0.000776742	0.00124217	0.000719207	0.00103784	0.00131085	0.00187654	0.000951316	0.000832732	0.00106901	0.00228772	0.0012622	0.0025124	0.00515734	0.00153194	0.00114581	0.00107897	0.000727874	0.000923856	0.0018122	0.00127602	0.00124193	0.000630404	0.00165131	0.0650342	0.00159596	0.00103371	0.000427775	0.00363798	0.00139863	0.000770734	0.00151273	0.000844454	0.0268758	0.00159131	0.00214587	0.00274528	0.000849259	0.00519804	0.00159581	0.00173488	0.00120231	0.002514	0.00218966	0.000525128	0.00081977	0.000822412
ENSG00000269437	NXF2B	0.0018123	0.000509315	0.00190947	0.00180511	0.00144227	0.00159198	0.00232901	0.00106917	0.00223044	0.00123051	0.00373188	0.00466427	0.00280345	0.00605533	0.0224905	0.00136668	0.00234112	0.00171822	0.000683841	0.00167092	0.00518787	0.00154766	0.00247145	0.00150912	0.00337904	0.303661	0.00190137	0.00111923	0.000387396	0.0193163	0.000778484	0.000488305	0.00207882	0.000799161	0.147647	0.00276579	0.00410288	0.00543267	0.00150823	0.0161069	0.00260405	0.00560312	0.0028609	0.00229211	0.014842	0.00128028	0.00228954	0.00332716
ENSG00000269586	CT45A10	0.00163134	0.00251401	0.00286191	0.00324338	0.00111541	0.00400372	0.00153803	0.00371455	0.00387024	0.0024649	0.00302944	0.0923327	0.00219973	0.00351332	0.0225312	0.00318261	0.00173485	0.00299831	0.00160038	0.00203595	0.00220591	0.00108638	0.00228364	0.00161485	0.00593922	3.88405	0.00479136	0.00149521	0.000982824	0.0577657	0.00488329	0.00296774	0.00377037	0.0858384	0.00501057	0.0839732	0.174016	0.124691	0.0695075	0.201371	0.390902	0.320053	0.166886	0.00375556	0.0491953	0.00352409	0.180863	0.000947765
ENSG00000269791	SSX4B	0.00243526	0.00119603	0.00397374	0.00192754	0.00155179	0.00236994	0.00291739	0.00156782	0.00207068	0.00261621	0.00146383	0.00114525	0.0013495	0.00466057	0.0048308	0.00321344	0.00111207	0.00203414	0.00137829	0.00140003	0.00144858	0.00142775	0.00108283	0.0014402	0.00214939	0.0409928	0.00510281	0.00291766	0.00137271	0.00150021	0.00110958	0.00278134	0.00319178	0.00140529	0.00542541	0.00196837	0.00124898	0.00175809	0.000606585	0.00333322	0.000985031	0.00211492	0.00146875	0.00163206	0.00257767	0.000767611	9.8777e-05	0
ENSG00000270946	CT45A9	0	0	0	0	0	0	0	0	0	0	0	0	0	0	0	0	0	9.48738e-05	0	0	0	0	0	0	0	0.000900222	0	0	0	0	0	0	0	0.000293391	0	0	0.000105976	0	0	0	0.000192642	0	0	0	0.000185674	0	0	0
ENSG00000271449	CT45A2	0	0	0	0	0	0	0	0	0	0	0	0	0	0	0	0	0	0	0	0	0	0	0	0	0	0.00112637	0	0	0	0.00010361	0	0	0	0	0	0	0.000155203	0.000131341	0	6.84158e-05	0	0	0.000542102	0	0	0	0.000133309	0
ENSG00000273696	CT45A7	0	0	0	0	0	0	0	0	0	0	0	0	0	0	0	0	0	0	0	0	0	0	0	0	0	0.00145737	0	0	0	0.000137137	0	0	0	0	0	0	0.000434106	0.000173862	0	9.05446e-05	0	0	0.000717557	0	0	0	0.000176475	0
ENSG00000274183	H2AFB1	0.0493091	0.0256641	0.0934976	0.0923932	0.0270135	0.047435	0.103316	0.0649485	0.054597	0.034389	0.0280881	0.0326768	0.0441642	0.0698667	0.108916	0.198452	0.0196982	0.119777	0.0424718	0.137272	0.0568903	0.119389	0.0952873	0.0769671	0.0851964	6.89519	0.0693568	0.0390218	0.0217896	0.111443	0.0383912	0.164837	0.0888906	0.18316	0.0570184	0.0330443	0.0342027	0.034054	0.0236198	0.0253854	0.0243672	0.0267969	0.0355098	0.11319	0.0946658	0.0289879	0.0170267	0.0724656
ENSG00000274391	TPTE	0.0114531	0.0159896	0.0106334	0.0141683	0.00750328	0.0135105	0.0260537	0.0158046	0.0606398	0.0218409	0.013032	0.00746091	0.0159477	0.0638179	0.0149934	0.0133845	0.0127922	0.0378378	0.0129576	0.0121784	0.106393	0.0131406	0.0257426	0.0123954	0.117503	143.075	0.0156647	0.0217838	0.00561056	0.0163877	0.00994274	0.00614596	0.0134101	0.0134904	0.11095	0.00399309	0.00466935	0.00713017	0.0039621	0.023294	0.010746	0.00240323	0.00387849	0.0357535	0.00768842	0.022121	0.0071383	0.0188617
[truncated: 6 more columns]

## Sheet: 92 CTA GTEx
92 CTAs: specific expressed in testis
Gene	Adipose_Subcutaneous	Adipose_Visceral_(Omentum)	Adrenal_Gland	Artery_Aorta	Artery_Coronary	Artery_Tibial	Bladder	Brain_Amygdala	Brain_Anterior_cingulate_cortex_(BA24)	Brain_Caudate_(basal_ganglia)	Brain_Cerebellar_Hemisphere	Brain_Cerebellum	Brain_Cortex	Brain_Frontal_Cortex_(BA9)	Brain_Hippocampus	Brain_Hypothalamus	Brain_Nucleus_accumbens_(basal_ganglia)	Brain_Putamen_(basal_ganglia)	Brain_Spinal_cord_(cervical_c-1)	Brain_Substantia_nigra	Breast_Mammary_Tissue	Cells_Cultured_fibroblasts	Cells_EBV-transformed_lymphocytes	Cervix_Ectocervix	Cervix_Endocervix	Colon_Sigmoid	Colon_Transverse	Esophagus_Gastroesophageal_Junction	Esophagus_Mucosa	Esophagus_Muscularis	Fallopian_Tube	Heart_Atrial_Appendage	Heart_Left_Ventricle	Kidney_Cortex	Kidney_Medulla	Liver	Lung	Minor_Salivary_Gland	Muscle_Skeletal	Nerve_Tibial	Ovary	Pancreas	Pituitary	Prostate	Skin_Not_Sun_Exposed_(Suprapubic)	Skin_Sun_Exposed_(Lower_leg)	Small_Intestine_Terminal_Ileum	Spleen	Stomach
MAGEC2	0.0117296	0.0239311	0.00963756	0.0104262	0.0135515	0.0108313	0.0043081	0.0144391	0.0124476	0.0057261	0.0185882	0.0171398	0.00709831	0.0138472	0.0157893	0.00565965	0.00920782	0.00422151	0.00569019	0.00454511	0.0167953	0.018801	0.0294773	0.01191	0.02075	0.00895483	0.00848085	0.00814992	0.0246299	0.0169395	0.00573444	0.00680868	0.00572008	0.00749341	0.00835	0.0105159	0.0118808	0.0108444	0.014511	0.0193736	0.0169345	0.00691086	0.0719063	0.032931	0.0122599	0.0164991	0.0120467	0.00955386	0.00987203
SPO11	0.00275979	0.00285549	0.00185992	0.00111076	0.00267462	0.00158288	0.00429714	0.00350243	0.0040785	0.00348333	0.00175284	0.00295444	0.00183924	0.00368593	0.00278086	0.00265564	0.00277689	0.00306577	0.00208541	0.00338353	0.00546972	0.00459133	0.00273345	0.00941	0	0.00190483	0.00171542	0.00178323	0.0019525	0.00416352	0.0148922	0.00136741	0.000680234	0.00228918	0	0.00275243	0.00162046	0.00152284	0.00178513	0.00441885	0.00279444	0.00112186	0.00292838	0.0107622	0.00391305	0.00382187	0.00260989	0.00182788	0.00215226
MAGEB2	0.0473109	0.0338208	0.0126636	0.0107894	0.0161627	0.0124687	0.0309214	0.0111209	0.00947665	0.00897211	0.0153637	0.0213719	0.0125749	0.0170232	0.0142695	0.00953506	0.012041	0.0121964	0.0134559	0.0224151	0.0354463	0.00785075	0.0337701	0.0233578	0.006289	0.0202108	0.0140161	0.0384114	0.0138934	0.0410052	0.0117644	0.00902807	0.0083633	0.00777306	0.0103275	0.0102139	0.0200039	0.0269138	0.0164817	0.0825045	0.104709	0.00755558	0.0186889	0.0436624	0.0243862	0.0382013	0.0350713	0.0214512	0.0180196
LUZP4	0.00625326	0.00481769	0.0258021	0.0131192	0.0126235	0.013549	0.0135343	0.00833855	0.011133	0.00699363	0.00336707	0.00467311	0.0127605	0.0127027	0.00699299	0.00960683	0.00916142	0.00642533	0.00888761	0.0138091	0.00674654	0.00546821	0.0128252	0.00965333	0	0.00589206	0.00556119	0.00375667	0.00119901	0.00555033	0.0198189	0.00461615	0.00124531	0.00581988	0	0.00238572	0.00426535	0.0019416	0.00186707	0.017633	0.00571094	0.000583689	0.0516637	0.0141658	0.00453224	0.00262217	0.00467471	0.00372618	0.00253535
ADAM2	0.00512657	0.00601591	0.0067304	0.00450039	0.00597492	0.00449054	0.012969	0.0202586	0.00419937	0.00298392	0.00739795	0.0127676	0.00414502	0.0023625	0.0883077	0.0544781	0.00517859	0.00416102	0.00921937	0.00450691	0.0391785	0.00518578	0.0147474	0.0115967	0.011518	0.00997185	0.00748249	0.00559334	0.0061279	0.0188216	0.00807222	0.00389154	0.00225394	0.011975	0.03435	0.00849863	0.0116074	0.00540961	0.00709497	0.00723114	0.00726633	0.00318329	0.00703852	0.134614	0.0158392	0.00686917	0.0107531	0.0064828	0.00651263
MAGEB4	0.00625466	0.00402872	0.00215426	0.00280398	0.00363217	0.00143944	0.00338905	0.00145316	0.00350534	0.00213316	0.0023253	0.00571345	0.00387969	0.00496574	0.00110426	0.00231916	0.000572423	0.00112024	0.00199792	0.000979784	0.0336806	0.00166353	0.0187775	0.0165644	0.003893	0.00429182	0.00411565	0.0067304	0.00317874	0.00926852	0.00308111	0.0017307	0.00166567	0.00298141	0	0.00312792	0.00177584	0.0120589	0.00311523	0.00762721	0.00195761	0.00243788	0.00244883	0.0212933	0.0102282	0.00713093	0.00774858	0.00144062	0.00399228
GJA8	0.00464231	0.00987915	0.00761395	0.00693488	0.0058345	0.00684851	0.0216976	0.0135879	0.00957	0.00723911	0.00864414	0.00993527	0.0096149	0.0104281	0.0120968	0.00943376	0.0106186	0.00636668	0.0241109	0.0088464	0.0107083	0.00553516	0.0074754	0.0269889	0.017102	0.00515212	0.00414421	0.00467588	0.00415398	0.00744264	0.0206367	0.00377869	0.00273104	0.0947243	0.0306275	0.0128816	0.0104538	0.00508611	0.00491382	0.00764349	0.0136623	0.00315832	0.0165807	0.0131278	0.00860134	0.00748713	0.00646278	0.014807	0.0137553
MAGEA9	0.00147624	0.00138309	0.000961047	0.00112127	0.00216996	0.0011683	0	0.0028278	0.00240643	0.00234462	0.00450698	0.00266329	0.00293945	0.00261694	0.00179664	0.00339383	0.00214825	0.00141184	0.00107491	0.00143793	0.00246532	0.00112758	0.00420483	0	0.003323	0.00225405	0.00164478	0.00166886	0.00103204	0.00123927	0.00393667	0.00138625	0.000688623	0.00115635	0	0.00122115	0.00238472	0.000693457	0.00163969	0.00230795	0.00303478	0.000557409	0.00243871	0.00276424	0.00146924	0.00183905	0.0022092	0.00267502	0.00125549
CTCFL	0.0194882	0.0383854	0.00513466	0.00812436	0.00944968	0.00880374	0.0123768	0.00756278	0.00567246	0.00729885	0.0211724	0.0232796	0.00745641	0.00885433	0.00679314	0.0371624	0.0175558	0.00556344	0.00842151	0.00816892	0.0164393	0.0117238	0.0420261	0.0108374	0.0125959	0.0104495	0.0142176	0.00852883	0.00896834	0.0105309	0.0137239	0.00410204	0.00398719	0.0412522	0.007946	0.0429485	0.0138873	0.0050468	0.0115365	0.0209022	0.017931	0.00783117	0.179075	0.0230406	0.00675501	0.00875377	0.0253875	0.0692443	0.0108833
MAGEA10	0.0191103	0.0143281	0.00176908	0.00555338	0.00542847	0.00530184	0.0181862	0.00381563	0.00440177	0.000883886	0.0019834	0.00311541	0.0036002	0.00308313	0.0024227	0.00994019	0.00223458	0.00101713	0.000900088	0.00248107	0.0182011	0.00308843	0.00168983	0.0499289	0.016636	0.00200217	0.00324708	0.00263271	0.0148993	0.003533	0.00492667	0.00288394	0.00119356	0.00532924	0.0217225	0.00207248	0.00430332	0.0153272	0.00155359	0.00711772	0.00835133	0.00397753	0.0103293	0.0481106	0.0545997	0.0381206	0.0122638	0.00556095	0.00325183
SSX1	0.0216373	0.0329007	0.0136342	0.013461	0.0148922	0.018562	0.00741476	0.0183784	0.0120588	0.00929195	0.0317303	0.0310717	0.0104655	0.015599	0.0109688	0.0114823	0.0128266	0.00609683	0.0107866	0.0111917	0.0179128	0.0127659	0.0378568	0.00561444	0.015353	0.0106395	0.00931229	0.0101043	0.0102123	0.0164861	0.0373567	0.00777476	0.00800624	0.00556694	0	0.00776053	0.0171802	0.00892488	0.0196026	0.0303989	0.0163193	0.00923173	0.0119622	0.0287552	0.0196063	0.0236971	0.0130899	0.00880149	0.0092385
RHOXF2	0.0122734	0.0143962	0.0141871	0.0119503	0.0143084	0.0107666	0.0217195	0.0137723	0.0145432	0.0124091	0.0600069	0.0609392	0.0151541	0.0188311	0.0133716	0.0201978	0.016516	0.00867954	0.0153155	0.011709	0.0157625	0.00741606	0.0161892	0.0268378	0.034003	0.0137791	0.0158533	0.0133749	0.0157781	0.0160856	0.0544722	0.00765665	0.00450128	0.013174	0.0044625	0.00728001	0.0147119	0.0102103	0.00640032	0.0184664	0.0568942	0.00498317	0.0322381	0.0221001	0.0183526	0.0209536	0.017896	0.0205926	0.00876136
FTHL17	0.0028008	0.00294458	0.00291271	0.00244951	0.00589712	0.00212866	0	0.00403145	0.00244852	0.000288455	0.0017154	0.000893693	0.00119671	0.000859665	0.00170401	0.000908663	0.000634065	0.00109249	0.00236075	0.000723741	0.0046556	0.00460109	0.00388741	0.0150333	0	0.00257547	0.00174209	0.00189613	0.00244142	0.00342023	0	0.00170709	0.001136	0.000524353	0	0.00132996	0.00348682	0.00159821	0.00257223	0.00470554	0.00962067	0.00225085	0.00110297	0.0073458	0.0885956	0.202972	0.00246422	0.00224448	0.00159838
AKAP4	0.0704449	0.0550929	0.062932	0.043351	0.0350125	0.0300706	0.0659795	0.0115914	0.0124903	0.00958083	0.0237661	0.0499201	0.0166752	0.0136454	0.00777522	0.0125211	0.0150293	0.0106157	0.00750633	0.0134741	0.317609	0.0350423	0.0256087	0.0831633	0.059785	0.0466713	0.0446977	0.0349383	0.0371847	0.20224	0.0510389	0.0162265	0.0155014	0.0501194	0.02541	0.0458319	0.059187	0.0389754	0.0680187	0.0427176	0.054374	0.0274842	0.0610655	0.401676	0.105256	0.0972873	0.109225	0.0376032	0.0431833
CPXCR1	0.00168538	0.00256551	0.000611473	0.00214954	0.0008175	0.000897134	0	0.0102327	0.00190284	0.0366163	0.000115256	0.000968631	0.00089851	0.000163493	0.00792964	0.0252565	0.0176215	0.000158976	0.00290283	0.00204863	0.0108093	0.00138361	0.00453603	0	0.006212	0.00170606	0.00238076	0.00127432	0.00494371	0.00353963	0.0165856	0.00102627	0.000489444	0.000934706	0	0.00127646	0.012756	0.00176994	0.00290228	0.00159097	0.0020365	0.000716707	0.0134001	0.00943543	0.00369808	0.0037779	0.0025015	0.00374975	0.0013517
MAGEA4	0.00808724	0.00440594	0.00261326	0.0109516	0.00356288	0.00287983	0.0047781	0.0116214	0.0348429	0.00546309	0.00260161	0.0165399	0.0167072	0.00972124	0.0130511	0.00575898	0.00676545	0.00855658	0.00126031	0.00742446	0.0160478	0.0139426	0.00319782	0.0154889	0.021335	0.0156875	0.00493452	0.00365293	0.00632036	0.0145953	0.00462778	0.00422183	0.00141144	0.00842531	0	0.0102594	0.00777931	0.00321051	0.00317495	0.00694426	0.00492828	0.00252846	0.0573898	0.0163911	0.00661381	0.00604757	0.00647193	0.00510795	0.00331802
MAGEC1	0.00556638	0.0107388	0.00555752	0.0415918	0.0180965	0.0156403	0.0167019	0.00707937	0.0136491	0.00903692	0.0146345	0.0142061	0.0123103	0.0125641	0.0138699	0.0144225	0.0169691	0.0078835	0.0210514	0.0135876	0.00874917	0.0108394	0.0440578	0.0208633	0.004003	0.00430851	0.00593662	0.00452501	0.00526365	0.0118601	0.0185478	0.00463125	0.00334594	0.0218968	0.017415	0.00647673	0.00829239	0.00780843	0.00820743	0.00902816	0.0182481	0.00443453	0.0178344	0.0144463	0.00679075	0.00533567	0.00357321	0.192835	0.00564377
PAGE5	0.0212024	0.0536142	0.0228384	0.0167697	0.0182462	0.0201857	0.0764095	0.0174059	0.0121853	0.00706382	0.0247721	0.0269876	0.00962498	0.0144994	0.0140382	0.0187165	0.013418	0.0100355	0.0196117	0.0156503	0.0386378	0.0319264	0.0960654	0.0258011	0.04544	0.0212146	0.0441689	0.0173927	0.0325347	0.0268879	0.0600667	0.00986056	0.00750264	0.0777624	0.062575	0.324791	0.0636594	0.0377776	0.0213839	0.0256541	0.0182681	0.0234112	0.0299646	0.0513691	0.109055	0.0593052	0.165191	0.0759711	0.0470311
DPPA2	0.00164873	0.00273416	0.00316399	0.00272775	0.00207187	0.00213682	0.00552714	0.00125033	0.00374426	0.0067052	0.00119744	0.0015817	0.00193039	0.00198689	0.00145503	0.00796262	0.00747927	0.00177054	0.00447472	0.00331676	0.00301325	0.00195361	0.00087569	0.0216456	0.020149	0.00133697	0.0019151	0.00115584	0.0011024	0.00269668	0	0.00322168	0.000759468	0.0984314	0.214265	0.00643916	0.0056841	0.000643704	0.00149661	0.00247459	0.00255039	0.00130829	0.0595362	0.00450416	0.00215139	0.000912896	0.0121006	0.0154912	0.00188376
CAGE1	0.0218142	0.019798	0.0258741	0.0149538	0.020075	0.013714	0.014921	0.0131156	0.00978999	0.0118902	0.0130231	0.0121157	0.0101479	0.00909613	0.00977298	0.0172042	0.0115754	0.00744837	0.0121127	0.00988202	0.0372089	0.0349726	0.0484452	0.0341267	0.031814	0.0147084	0.0153745	0.0122641	0.038619	0.0160123	0.0464611	0.00714173	0.0055593	0.0190046	0.02579	0.0113924	0.0182463	0.0265958	0.00944415	0.0342652	0.0217523	0.00989517	0.0517424	0.0402895	0.0326836	0.0301236	0.0189187	0.0551894	0.0126513
SSX3	0.00535606	0.00805563	0.00375291	0.00504933	0.00569958	0.00468333	0.0204233	0.00681782	0.00447797	0.00333585	0.0080946	0.00603971	0.00362706	0.00318751	0.0208988	0.00732389	0.00284463	0.001891	0.00305132	0.00533791	0.00782571	0.00410024	0.00917782	0.0269144	0.003509	0.00514172	0.00456879	0.00582768	0.00417234	0.0100987	0	0.00283142	0.00285308	0.00239879	0.0032225	0.00521204	0.00740148	0.00331025	0.00453503	0.00772897	0.00599889	0.0028985	0.00659795	0.0152308	0.00428242	0.0066935	0.00546262	0.00521324	0.00972251
PASD1	0.0191102	0.00769987	0.00541558	0.00872409	0.0332786	0.00770941	0.0387895	0.00670364	0.00718409	0.0192806	0.00571535	0.00740929	0.00481118	0.00611085	0.00533653	0.0416623	0.0153794	0.0135469	0.00282847	0.00358521	0.014877	0.0210758	0.0166266	0.00781333	0.003089	0.0133582	0.0116197	0.0190692	0.00641382	0.0185693	0.00736	0.00570351	0.00537989	0.00203141	0.00199275	0.00694974	0.0107651	0.0104707	0.0127902	0.0274703	0.0275304	0.00311253	0.00607027	0.0228237	0.0142354	0.0197088	0.00850139	0.00387249	0.00495256
POTED	0.000540947	0.000614991	0.000717012	0.000520949	0.000428792	0.000201087	0	0.000272039	0.000554682	0.0003305	0.000303581	0.000466349	0.000222345	0.000168053	0.000286772	0.00085446	0.000616374	4.05171e-05	0.000577692	0.000436187	0.00520885	0.000753413	0.000261609	0	0.003841	0.000789118	0.000807751	0.000648235	0.00097627	0.000848874	0.00255333	0.000195809	0.000199516	0.000463906	0	0.000258186	0.000558131	0.000579136	0.000789513	0.000975897	0.000710889	0.000927223	0.00122693	0.00351098	0.000672992	0.000406976	0.000709465	0.000271801	0.000870557
PLAC1	0.0202596	0.0153905	0.0130874	0.074416	0.0458635	0.053728	0.181871	0.0216414	0.0208826	0.0174926	0.0233847	0.02203	0.0263905	0.0240107	0.0190613	0.018356	0.0185871	0.0165301	0.0276665	0.0223871	0.0238558	0.686448	0.130201	0.0597478	0.125782	0.0179449	0.0295823	0.0239728	0.0364425	0.0276638	0.189749	0.00954282	0.0138189	0.0214166	0.0168675	0.0114821	0.137947	0.108158	0.0985129	0.0301674	0.237009	0.010738	0.0997017	0.0305866	0.0828221	0.157459	0.0144114	0.0539863	0.0398487
XAGE3	0.365972	0.10045	0.00643531	0.0141236	0.0511976	0.00930416	0.00703333	0.0315961	0.0327702	0.0250101	0.0141382	0.0187425	0.0232912	0.0211753	0.0168584	0.0297952	0.0363704	0.0282955	0.0236048	0.028842	0.476251	0.0186227	0.00535655	0.0262722	0.02622	0.0128025	0.0176151	0.0102362	0.00308575	0.0107294	0	0.00539928	0.00235414	0.0886861	0.121875	0.235395	0.0914367	0.00903253	0.0222397	0.031625	0.00872506	0.0256751	0.0187656	0.00929531	0.0222664	0.0284769	0.0164028	0.00246257	0.0462329
FAM46D	0.00291662	0.00299885	0.0516048	0.00330016	0.0031825	0.00134953	0.01619	0.00334106	0.00424531	0.00639241	0.0050178	0.0035822	0.00297254	0.00327296	0.00523585	0.0062862	0.00673342	0.00288222	0.00269327	0.00186892	0.0151446	0.00424776	0.00170324	0.00659222	0.011326	0.00319966	0.00298137	0.00344594	0.00154915	0.00311949	0.0266656	0.00269697	0.000790627	0.00927379	0.0142725	0.00115961	0.00289112	0.0103148	0.00134419	0.0202336	0.0367106	0.00494537	0.0160918	0.020148	0.00383244	0.00573292	0.0036538	0.00208129	0.00743451
GOLGA6L2	0.00914188	0.00932475	0.126867	0.0218683	0.0175707	0.013048	0.0146448	0.0144069	0.0205639	0.0268353	0.0101265	0.0221063	0.0202283	0.0175555	0.017854	0.0224402	0.0196112	0.0314955	0.00725422	0.0153317	0.0499106	0.0114645	0.0101866	0.00481	0.011981	0.0134161	0.0146669	0.00934793	0.0206771	0.0292341	0.0166933	0.0107171	0.00674766	0.0155252	0	0.0141699	0.0175122	0.017084	0.0199465	0.0141469	0.0163261	0.0112353	0.0194913	0.0841706	0.0201067	0.0198526	0.0203012	0.00979005	0.014218
MAGEB6	0.00103014	0.00131628	0.00118341	0.00248782	0.000575542	0.0013036	0.00286381	0.000832895	0.00204278	0.000447317	0.00252916	0.00225058	0.000667255	0.000676364	0.000892437	0.000416238	0.000793333	0.000478	0	0.00116655	0.00411281	0.00271411	0.00902649	0.0116033	0.007233	0.00165721	0.00247813	0.000980107	0.0012009	0.00480509	0.00585778	0.000531492	0.000616759	0.00150671	0	0.00207288	0.00112676	0.0020358	0.0013381	0.00247591	0.00105128	0.00174061	0.0013377	0.00618351	0.00167522	0.00121601	0.00124545	0.00242398	0.000918969
FMR1NB	0.0347578	0.045167	0.0356341	0.0346033	0.0449915	0.0466574	0.0397729	0.0452493	0.0499678	0.0251	0.0824608	0.0904732	0.0408656	0.0388859	0.0318627	0.0472422	0.0327637	0.0258705	0.029402	0.0392604	0.0728899	0.0259341	0.0347698	0.128518	0.071212	0.0410969	0.0342293	0.0331465	0.0234283	0.0441956	0.0896922	0.0153281	0.0102103	0.0423213	0.029275	0.0992671	0.0464757	0.0390805	0.0205479	0.0776749	0.0687958	0.0209676	0.0829494	0.140138	0.0450573	0.049286	0.0514889	0.0997006	0.0289284
ODF3	0.0578933	0.0350309	0.0134456	0.0451095	0.0387754	0.0508768	0.0389876	0.0243798	0.034581	0.0226248	0.0904559	0.0906719	0.0564145	0.0625202	0.0240073	0.0264158	0.0260854	0.0213135	0.0277177	0.0144372	0.0680849	0.0128021	0.0301732	0.0389933	0.050555	0.0410898	0.028896	0.0392647	0.018394	0.0392595	0.0774422	0.019929	0.0133024	0.0201031	0.0096875	0.0125104	0.050755	0.0378412	0.024419	0.0890594	0.0805151	0.0303679	0.0237749	0.044588	0.0560013	0.065425	0.042464	0.0446703	0.0311381
POTEC	0.0012589	0.00294953	0.00162985	0.00142037	0.00109088	0.00122582	0.00169738	0.00119162	0.00208784	0.00192198	0.00189213	0.00210612	0.0028037	0.0012989	0.00137928	0.00463907	0.00244398	0.00147052	0.00246356	0.00127586	0.00517606	0.00303634	0.00857025	0.00169111	0.0024161	0.00206037	0.00429715	0.00146129	0.0015026	0.00272852	0.00213278	0.00075886	0.000759352	0.000592541	0	0.00148449	0.00149411	0.000823432	0.0015509	0.00401503	0.00232441	0.0511193	0.00389841	0.010098	0.00175671	0.00157069	0.00182142	0.00186366	0.0014537
MAGEA2B	0.0010106	0.000372458	0.000336589	0.00473523	0.0021863	0.00294835	0	0.000469868	0.000508	0.000804671	0.000429302	0.000727178	0.00114193	0.000380641	0.000736782	0.000985	0.000464313	0.000392346	0.000483333	0.000455424	0.000468647	0.000633234	0.000695057	0	0.00209	0.000650895	0.000639163	0.000695491	0.000992281	0.00041695	0.00242111	0.00087738	0.000403801	0.0005944	0	0.000276752	0.000874417	0.000410988	0.000582045	0.000890291	0.000607278	0.000442277	0.000512085	0.000752776	0.000625224	0.000927656	0.000322139	0.000437303	0.0003939
TFDP3	0.00390371	0.00269427	0.00379771	0.00533016	0.00467588	0.00438827	0.00632857	0.00370803	0.00469108	0.00272018	0.00245014	0.00337407	0.00224612	0.00223923	0.0045634	0.0131632	0.00387057	0.0017479	0.00166239	0.00225906	0.280824	0.00366373	0.0250009	0.0210844	0.006027	0.00402598	0.00318719	0.00685536	0.00343809	0.00845656	0.0352022	0.00183909	0.00093128	0.00295412	0.0098975	0.000825735	0.00892663	0.0332647	0.00204192	0.00438212	0.00374844	0.00223232	0.0118911	0.00758751	0.0339985	0.0372592	0.00383267	0.00301822	0.00411081
CTAG1B	0.0066249	0.00675257	0.00453674	0.0200912	0.0213561	0.0258191	0.00793667	0.00103151	0.00135415	0.00272069	0.00577693	0.00776033	0.0031438	0.00360775	0.0038966	0.00472431	0.00240118	0.00159143	0.00348101	0.00193108	0.00697643	0.00702964	0.00420701	0.00612333	0.005073	0.0156218	0.0100794	0.0193526	0.00500899	0.016239	0	0.00310256	0.00235949	0.00253765	0.00833	0.00269292	0.0101349	0.0035129	0.00339181	0.00854779	0.007943	0.00239024	0.00633187	0.00693718	0.00516076	0.00635944	0.00589904	0.00414556	0.00669426
ODF4	0.0289878	0.020614	0.0146656	0.0207922	0.0232637	0.0209205	0.0556638	0.0246557	0.0154714	0.0202215	0.0189051	0.0215163	0.0173879	0.0173554	0.0148412	0.0195613	0.0205722	0.0193687	0.0200019	0.0172423	0.0725612	0.00868903	0.0111262	0.124056	0.015429	0.019993	0.0144501	0.017134	0.30452	0.0210339	0.0227622	0.00875081	0.0067792	0.0106045	0	0.0078508	0.0242682	0.0794658	0.0238209	0.0340808	0.0238408	0.00578924	0.0204798	0.0455332	0.0522246	0.052868	0.0139791	0.0156021	0.0144056
DDX53	0.00294494	0.00307143	0.00273167	0.00329963	0.00422989	0.00528133	0.00893571	0.00332039	0.00525219	0.008885	0.0501724	0.0896471	0.00625224	0.00523301	0.00232462	0.00445084	0.00603797	0.00568592	0.0026495	0.0028623	0.0106781	0.0030482	0.00267498	0.0127556	0.009486	0.0119064	0.00543983	0.0046429	0.00332586	0.00810025	0.00323111	0.00191407	0.00115255	0.00267794	0.0035675	0.00272958	0.00379893	0.00425044	0.00469665	0.00520078	0.00807917	0.00218538	0.00947184	0.0163842	0.00406346	0.00371401	0.00518388	0.00230695	0.0054859
MAGEA11	0.015733	0.00628601	0.00279651	0.0137097	0.0102154	0.00516014	0.0563676	0.0063283	0.00760309	0.00337713	0.0193622	0.00663772	0.00714371	0.00815868	0.00795608	0.00655868	0.00615697	0.00392144	0.00349874	0.0131645	0.0108219	0.0254435	0.108952	0.0362433	0.01719	0.00771292	0.01378	0.00254522	0.207352	0.00692285	0.0122144	0.00231944	0.0041452	0.00215645	0	0.00233987	0.0102951	0.0167235	0.00351712	0.00858044	0.0132839	0.00285933	0.00432534	0.0108593	0.221836	0.105945	0.00475807	0.19821	0.00448128
POTEG	0.0366675	0.0310205	0.0137361	0.0872234	0.0803414	0.118967	0.0679781	0.00861137	0.0101154	0.00815317	0.00957495	0.00980988	0.0107652	0.0124213	0.00789268	0.00667012	0.0109259	0.00625207	0.0166538	0.00912288	0.0330604	0.0629301	0.123941	0.05189	0.046693	0.0802805	0.0432959	0.0683819	0.030626	0.0728456	0.0405533	0.0466801	0.0376448	0.0124011	0.0045425	0.00777102	0.0437329	0.0201487	0.0104557	0.0330839	0.027935	0.00784606	0.0129995	1.52213	0.0215119	0.0215929	0.0445483	0.0339176	0.0360734
POTEE	0.103376	0.0917126	0.0462422	0.236813	0.223919	0.35437	0.154618	0.0270023	0.0301752	0.0329248	0.0388943	0.0379873	0.0404551	0.0387191	0.0329529	0.0329332	0.038077	0.0246498	0.054659	0.025844	0.112458	0.256384	0.41504	0.127954	0.108036	0.252137	0.151185	0.223592	0.0976525	0.259415	0.152509	0.0448585	0.0468513	0.0356246	0.0263025	0.0241272	0.13785	0.0704012	0.233053	0.0913111	0.0897309	0.017459	0.0474754	0.411614	0.0524572	0.0660941	0.111674	0.0898386	0.110993
MAGEB5	0.00154632	0.00345933	0.000787829	0.00077625	0.000652167	0.000769849	0.00319381	0.000212237	0.00037267	0.000184228	0.00078986	9.24481e-05	0.00154286	0	0.00144426	0.000316139	0.000154187	0.000230683	0.000287673	0	0.00236357	0.00032623	0.000560345	0	0	0.00112641	0.000387512	0.00014824	0.000668054	0.00127099	0	0.000532587	0.000409514	0.000767765	0.042575	0.00184071	0.000641107	0.0563289	0.000979128	0.00169877	0	0.00336451	0.000509505	0.000945796	0.000786424	0.00122294	0.000289358	0.000541743	0.00364109
POTEA	0.00110808	0.000802884	0.00122814	0.00155301	0.00145179	0.00134528	0.00247429	0.000759862	0.00150781	0.000426463	0.00224367	0.00165515	0.00165956	0.00082001	0.000605838	0.000671436	0.000853976	0.000483337	0.000178113	0.000463928	0.00279728	0.00190001	0.00237161	0.00735111	0.005235	0.0015826	0.00105756	0.00133872	0.00127928	0.00383509	0	0.000847147	0.000685833	0.000447282	0	0.00128997	0.0016881	0.00114586	0.00153155	0.0020826	0.00199383	0.000796655	0.00258749	0.00656539	0.00194882	0.00127542	0.00182561	0.000980664	0.00183841
GAGE2A	0.0083316	0.00982619	0.00876857	0.00950991	0.00629588	0.00687249	0.0120286	0.00774158	0.0161663	0.00778854	0.0118221	0.0172099	0.00370404	0.00707301	0.00375848	0.00716876	0.0113023	0.0063178	0.00254899	0.00113122	0.0117499	0.00858609	0.00954897	0	0.0423	0.00549828	0.00974773	0.0088116	0.00844712	0.0205707	0.0126	0.00475131	0.00466979	0.00376647	0.0160625	0.00402164	0.0071019	0.00566	0.00938276	0.00831464	0.0211894	0.00452899	0.0158758	0.0265646	0.00939487	0.0121416	0.015946	0.00807411	0.00878446
SPANXN3	0.0143958	0.0126422	0.0707871	0.0170325	0.022206	0.0106999	0.00548095	0.0173683	0.0253586	0.00699207	0.0160357	0.0141817	0.0151456	0.016599	0.0110138	0.018708	0.0103647	0.00420839	0.00568075	0.0334461	0.0568667	0.00909044	0.00579167	0	0	0.0134916	0.00951958	0.00437093	0.00919625	0.0444746	0.0216111	0.0120464	0.00548764	0.0147901	0	0.0184508	0.00618784	0.00880741	0.0533327	0.0109884	0.0133629	0.00812131	0.0145381	0.0853592	0.0146385	0.0137495	0.0352613	0.00859647	0.0078383
SPANXN4	0.00209632	0.00273564	0.00299981	0.00168539	0.00244262	0.00187339	0.015129	0.019948	0.0160929	0.000331138	0.000294512	0.00494137	0.00276576	0.00234187	0.0192018	0.00190054	0.00117061	0.00033639	0.00106572	0.000699424	0.0189342	0.0022753	0.000420977	0	0	0.00424941	0.00351658	0.00303277	0.00360784	0.01117	0	0.00135357	0.00105516	0	0	0.00290124	0.00594609	0.00256969	0.00356724	0.00267863	0.00226033	0.00217622	0.00276254	0.0197891	0.00387366	0.00319391	0.00476235	0.00629967	0.00250922
SPANXD	0.00509768	0.00592329	0.00310829	0.0223525	0.00974521	0.00972348	0	0.0080775	0.00565114	0.00454459	0.00329372	0.00636871	0.00571141	0.0043689	0.00503797	0.00304223	0.00575447	0.00232659	0.00475157	0.00372475	0.0200006	0.0167635	0.00294213	0	0	0.00600413	0.0054797	0.00691115	0.00289095	0.021251	0.0104711	0.00219702	0.00192507	0.00156718	0	0.00765473	0.00484166	0.00458716	0.00938029	0.00659189	0.0024705	0.00293841	0.00888431	0.0215303	0.00755199	0.00697485	0.0047893	0.00320253	0.00509368
MAGEA6	0.00873926	0.0125233	0.00561368	0.0130147	0.00935728	0.0134187	0.0102167	0.0157384	0.0103675	0.00462477	0.00961312	0.0110634	0.00813911	0.0111883	0.0117908	0.00939965	0.0096709	0.00481638	0.00611258	0.00377432	0.00690429	0.00708321	0.0232753	0.0686933	0.095012	0.00504282	0.00630042	0.00513045	0.00696959	0.00819177	0	0.00472846	0.0049286	0.00386084	0.008925	0.00547049	0.00901841	0.00582006	0.0106825	0.0217616	0.0110906	0.00511783	0.0136565	0.0171659	0.0122695	0.0127506	0.00678134	0.00962776	0.00473836
SPANXA1	0.000308492	0.00084183	0.000164341	0.00115289	0.00030125	0.000556652	0	0.000292039	0	0	0.000179814	0.000177137	0	0.00019512	0.000299797	0	0.000576829	0.000341854	0	0	0.000313159	0	0	0	0	0	0.000334458	0.000321867	0.000128378	0.000238699	0	0	0	0	0	0	0.000228114	0	0.00019726	0.000292488	0	0.000218963	0.000721343	0.000270898	0.000339487	0	0	0.000210705	0.000328942
POTEH	0.00240005	0.00156863	0.00221585	0.00449248	0.00135837	0.00169753	0.0122495	0.000925526	0.00229291	0.00132902	0.000600512	0.00119075	0.00257369	0.00222167	0.00149226	0.00143312	0.000813598	0.000386537	0.00231415	0.00114871	0.00814571	0.00453357	0.0166906	0.0100067	0.011134	0.00138871	0.0035313	0.00249228	0.00393371	0.00460736	0.0255344	0.00088359	0.000901829	0.00188091	0	0.00184934	0.00312886	0.00254814	0.00194953	0.00204231	0.00318639	0.00226608	0.00425512	2.95426	0.00263452	0.00164074	0.0141565	0.00823407	0.00223267
SPANXC	0.00316341	0.0227223	0.00365035	0.0293472	0.0102177	0.0134816	0	0.0203595	0.00862398	0.00212577	0.00544693	0.00511369	0.00351957	0.00306646	0.00594528	0.00670876	0.00407951	0.00245239	0.00709396	0.00795647	0.00633383	0.0407637	0.00702943	0.0272889	0.01246	0.0046756	0.00264968	0.00261109	0.00515279	0.00706431	0	0.000657343	0.00155051	0.000600118	0	0.00509398	0.00481522	0.00745093	0.00260669	0.00667942	0.0100828	0.00175985	0.00427247	0.0279056	0.0063502	0.00445625	0.00157043	0.000553527	0.00630476
MAGEA1	0.00660502	0.0131796	0.009325	0.0145422	0.010251	0.0109152	0.0144552	0.00434783	0.00515403	0.00350659	0.012013	0.00992604	0.00600153	0.00886115	0.00612819	0.00570209	0.00436379	0.0032208	0.00622428	0.0052059	0.0109646	0.00860976	0.0587982	0.02856	0.005814	0.00642005	0.00543606	0.00617477	0.00530054	0.0102908	0.0234067	0.00470678	0.00350396	0.00265588	0.004255	0.00486527	0.00821237	0.00499883	0.00764788	0.0116511	0.014222	0.0053754	0.032748	0.0125803	0.00563419	0.00640148	0.00497824	0.0040266	0.00558565
MAGEB3	0.00225426	0.00128608	0.0192791	0.000890301	0.00149017	0.00152953	0.00652095	0.00386816	0.00348466	0.00233376	0.0130142	0.0192807	0.00457028	0.00285474	0.00556086	0.0047752	0.00328659	0.00187509	0.00499044	0.00589439	0.00322619	0.00129484	0.00656063	0.00981222	0	0.00162064	0.00136488	0.00103493	0.00132894	0.00358837	0	0.000790319	0.000511919	0.000676753	0	0.0010915	0.00172613	0.00218179	0.00173099	0.0160097	0.00391039	0.000826149	0.00319781	0.00508486	0.00211758	0.00226145	0.00352508	0.00136564	0.00143719
SPANXN1	0.000704404	0.00418948	0.00102093	0.00245819	0.00108687	0.000283017	0.00364905	0.00561987	0.00609767	0.00405976	0.000828233	0.00125187	0.00203525	0.00140828	0.00252904	0.00226238	0.0028889	0.00101044	0.00126736	0.00689165	0.0024029	0.00267246	0.00125034	0.0187578	0	0.00116075	0.00128635	0.000901493	0.00127191	0.00283757	0	0.00069035	0.000415486	0.000513412	0	0.00220403	0.00413457	0.000699198	0.00156592	0.00132719	0.00290222	0.0009275	0.000839046	0.00165171	0.00108331	0.000950371	0.0019416	0.00131568	0.00108479
SPANXA2	0.0014184	0.0030914	0.000720271	0.0418157	0.0161179	0.0284855	0	0.00950651	0.007335	0.00608126	0.000652	0.00257598	0.0060089	0.00711316	0.00759492	0.0100263	0.00849313	0.00498644	0.010993	0.00855338	0.00144571	0.00507208	0	0.00607111	0	0.000949812	0.000730246	0.00052792	0.00035827	0.00163006	0.00974222	0.000775524	0.000140718	0	0	0.000155133	0.0025519	0.00252852	0.000406314	0.00271855	0.00186656	0.000221799	0.00365724	0.00263224	0.000615911	0.00132128	0.00061861	0.000238797	0.00104125
CT83	0.0166109	0.0212667	0.0132424	0.0210048	0.0135096	0.0131018	0.0617338	0.00290132	0.00357301	0.00145447	0.00623888	0.0122936	0.00508792	0.000371388	0.000575127	0.00210386	0.00259354	0.00224127	0.00324428	0.00312489	0.143072	0.0262648	0.00803057	0.0422	0.02857	0.0160332	0.0240053	0.00921	0.041982	0.050944	0.0478333	0.00867142	0.00277625	0.0465666	0	0.0141785	0.115777	2.49858	0.0205784	0.0118913	0.0221878	0.0222245	0.0478596	0.11133	0.0242616	0.0450885	0.0444971	0.00727759	0.0657934
SPANXN5	0.00698982	0.00640213	0.00394651	0.006894	0.00600483	0.00465947	0.0158038	0.012582	0.00492864	0.00242045	0.00455684	0.0044178	0.00330922	0.00208311	0.00374447	0.00308416	0.00156305	0.000818098	0.000659434	0.0030041	0.0272606	0.0113243	0.0104402	0.0121678	0.034953	0.00505097	0.00863768	0.00252867	0.0150594	0.0248682	0.00511556	0.00125923	0.00177337	0.00185871	0	0.00572451	0.00597	0.00833938	0.00677748	0.00455599	0.00750161	0.00398543	0.00731728	0.0322799	0.0248724	0.0168719	0.00583775	0.00440585	0.00440323
XAGE1A	0.00257624	0.00121567	0.00194787	0.00316856	0.00192504	0.003503	0.00593286	0.00180447	0.00063858	0.00265508	0.00389251	0.00523776	0.00191176	0.00278469	0.00158665	0.0033532	0.00211402	0.00169505	0.00162396	0.00158353	0.00272902	0.00232062	0.00214839	0	0	0.00197952	0.00236488	0.00289469	0.00225533	0.00223664	0.00671111	0.00112571	0.00116322	0.00123553	0	0.000618319	0.00506125	0.00223728	0.00151091	0.00371351	0.00602478	0.00186567	0.00565502	0.00307127	0.00267647	0.00316977	0.00246422	0.00181295	0.00188649
XAGE1B	0.00221428	0.00160845	0.00325988	0.0030156	0.00317146	0.00398362	0.00309571	0.00262414	0.00236784	0.0016978	0.00494753	0.00588369	0.00315522	0.00279813	0.00211223	0.00417427	0.00302325	0.000994634	0.00268491	0.00112194	0.00589076	0.00187317	0.00217218	0	0.005755	0.00321466	0.00208116	0.00205013	0.00169081	0.00270606	0	0.00163149	0.0011588	0.000815059	0	0.00110558	0.0135924	0.0092716	0.0015907	0.00284491	0.00338483	0.00137558	0.00546463	0.0033358	0.00178455	0.00395646	0.00294567	0.00337378	0.00140462
SLCO6A1	0.0161737	0.0102391	0.0151526	0.108911	0.0308883	0.0202415	0.0248743	0.0015508	0.0028379	0.00642439	0.00611298	0.00839224	0.00410344	0.00312462	0.0112452	0.0115787	0.00349094	0.0100041	0.0312555	0.0157911	0.0360628	0.00680288	0.00463504	0.0466544	0.022863	0.00979507	0.00800541	0.0100701	0.0431687	0.019797	0.00954667	0.0149776	0.00675615	0.0199306	0.0309925	0.00623794	0.0122248	0.0163371	0.00871585	0.00856854	0.00751556	0.00399422	0.0111958	0.0571764	0.0153845	0.0205261	0.0106074	0.00905759	0.00573435
GAGE1	0.00295011	0.00383225	0.00219394	0.00304441	0.00238066	0.00362032	0.00085619	0.00353259	0.00294305	0.002151	0.0053908	0.00543779	0.0022449	0.00284317	0.00156977	0.00381391	0.00274775	0.002705	0.00234101	0.00157548	0.00305079	0.00128184	0.00582253	0.00132667	0.004789	0.00197504	0.00164615	0.00214277	0.00192304	0.00343225	0	0.00133262	0.0017838	0.00196324	0.004931	0.00171931	0.00317098	0.00142721	0.00317264	0.0049743	0.00320667	0.000709366	0.00388204	0.00357424	0.00222047	0.00283453	0.00209907	0.00238162	0.00159889
CTAGE1	0.0108899	0.0375876	0.0197296	0.0653233	0.0969402	0.0217878	0.01752	0.00466816	0.00630276	0.00424442	0.00672102	0.00742826	0.00565787	0.00515267	0.007581	0.00765044	0.00537703	0.00419757	0.00829003	0.0090394	0.0257641	0.0236832	0.0127061	0.01647	0.0223805	0.0103685	0.0138963	0.00878623	0.0160086	0.01435	0.0427078	0.0488871	0.00692828	0.0130988	0.0033725	0.0289092	0.0155729	0.0190176	0.0106861	0.0101354	0.0210466	0.0107198	0.013402	0.0258412	0.0103738	0.00974473	0.0248168	0.0106405	0.014915
MAGEB1	0.0053895	0.00916621	0.00561981	0.00409877	0.00445767	0.00894167	0.00529286	0.00195099	0.00276358	0.00213524	0.00723833	0.00727149	0.00394243	0.00400388	0.00283332	0.00326861	0.00374175	0.00282668	0.00368044	0.00251475	0.0197167	0.00485698	0.0514035	0.00617778	0.017024	0.00452306	0.00527641	0.00620571	0.00429757	0.0095604	0.00793444	0.0037715	0.00309689	0.00460647	0	0.00599169	0.0054667	0.00418272	0.0067816	0.00870299	0.0185809	0.00312533	0.0108304	0.0296703	0.00863531	0.00643078	0.011244	0.00358726	0.00418067
GAGE12G	0	0	0	0	0	0	0	0	0	0	0	0	0	0	0	0	0	0	0	0	0	0	0	0	0	0	0	0	0	0	0	0	0	0	0	0	0	0	0	0	0	0	0	0	0	0	0	0	0
MAGEA3	0.00992551	0.0171396	0.00494775	0.0148086	0.0119316	0.0133447	0.00409095	0.014482	0.0146944	0.00656062	0.0165718	0.0132706	0.00782522	0.00863756	0.00915335	0.00854384	0.00738402	0.00445001	0.00619918	0.00324048	0.00883052	0.0108825	0.0351772	0.0321589	0.018104	0.00674469	0.00582587	0.00457277	0.0067596	0.013103	0.0113378	0.00555383	0.0045088	0.00489691	0	0.00463327	0.0107118	0.00533389	0.012015	0.0133608	0.0115802	0.00503143	0.0187632	0.0171406	0.00861108	0.0115601	0.00597235	0.00816062	0.00580646
CT47A6	7.92459e-05	0	0.000118605	0	0	0	0.00179333	0	0	0	0	0	0	0	0	0.000127178	8.38211e-05	0	0	0	8.62963e-05	0.00012873	0	0.00813556	0	0	0.000217512	0	0	0.000235689	0	5.56177e-05	0	0	0	0.000535265	0	0	6.27771e-05	0	0.000539889	0	0	0	0	4.72896e-05	0	0.000131618	9.95543e-05
CT47A12	0	0	0	0	0	0	0	0	0	0	0	0	0	0	0	0	0	0	0.000250314	0	0	0	0	0	0	0	0	0	0	0	0	0	0	0	0	0	0	0	0	0	0	0	0	0	0	0	0	0	0
SPANXB1	0.030183	1.32186	0.0203649	0.0847407	0.0570575	0.0292384	0.0720143	0.064707	0.0486713	0.00846093	0.0154984	0.0274577	0.0294051	0.0400706	0.016612	0.0215353	0.0136836	0.00657044	0.0110268	0.0174884	0.0960816	0.0769161	0.0382575	0.0839556	0.02975	0.022932	0.0231844	0.0179664	0.0185945	0.05582	0.0304556	0.0275873	0.00627692	0.0965436	0.65375	0.0395477	0.0262742	0.0368698	0.0351585	0.0898995	0.10304	0.0153603	0.0494909	0.0955289	0.0424209	0.034248	0.0269456	0.024131	0.0276919
CT47A7	0	0	0	0	0	0	0	0	0	0	0	0	0	0	0	0	0	0	0	0	0	4.68254e-05	0	0	0	0	0	0	0	0	0	0	0	0	0	0	0	0	0	0	0	0	0	0	0	0	0	0	0
CT45A5	8.62443e-05	0.000148725	0	0	0	0.000143771	0	0.00411316	0.00363449	0.00598122	0.000812465	0.00103174	0.00214471	0.00163746	0.00762508	0.0133084	0.00723915	0.00344937	0.010006	0.00275511	0.000405664	0	0.00724253	0	0	0	0.000154704	0	0.000122757	6.09515e-05	0	0.000228648	6.06944e-05	0	0	0	0.000474913	0.000183457	0	0.000204798	0.000659333	6.49695e-05	0.0128029	0.00116963	0	0.00010428	0	0	0.000274875
TSPY3	0	0	0.000101395	0	0	6.96531e-05	0	0	0.000175625	0	0	0	6.63922e-05	0	0.000123655	9.93069e-05	0	0	0	0	0.000105403	0.000257421	0	0.00629778	0	0	0.000289187	0	8.95495e-05	0.000270874	0	0	4.75463e-05	0	0	0	4.46367e-05	0.00023179	0.000151009	7.36026e-05	0.000318389	0	0.000642403	0.00115159	8.38079e-05	0	0	0	0.000106212
POTEB	0.000683428	0.000678503	0.000150426	0.000324051	0.000550167	0.00063368	0	0.000630658	0.000259585	0.000725959	0.000882047	0.0013373	0.000465408	0.000262488	0.00052066	0.000533218	0.000195707	0.000105659	0.000342327	0.000266187	0.000867778	0.0005475	0.000670207	0	0	0.000574252	0.00091469	0.000594427	0.000192973	0.00072668	0	0.000303014	0.000220507	9.32588e-05	0	0.000301726	0.000782839	0.00131321	0.000260174	0.000728433	0.000855167	0.000302159	0.00050159	0.000385771	0.000447449	0.000448802	0.000541765	0.000908851	0.000475376
CT47A1	5.42534e-05	0	0	0	0	0	0	0	0	0	0	0	0	0	0	0	0	0	0	0	0	9.29563e-05	0	0	0	0	8.59852e-05	0	0	0	0	0	0	0	0	0	0	0	0	0	0	0	0	0	5.59603e-05	0	0	0	0
TSPY10	0.000139382	7.79667e-05	0.000234225	0.000298009	0.000284667	0	0	0.00015375	0	0.00011252	0	0	0.000619569	0	0	0.000149455	0.000155528	0	0	0	0.000753725	0.000103135	0	0	0	0.00026429	5.4335e-05	0	0.000318414	0.000209709	0	5.56876e-05	1.65463e-05	0	0	0.000443717	0.000199896	0	0.000227895	0.00010084	0	0.000197561	0.000203958	0.00177702	6.80464e-05	0.000172154	0	0	0.000114345
CT47B1	0.00260825	0.00242351	0.00453318	0.00395278	0.00298758	0.00174994	0.00937714	0.0011402	0.00232693	0.00262089	0.0019713	0.0011039	0.00255094	0.00194512	0.00193198	0.000870743	0.00187687	0.00126571	0.000272893	0.000631727	0.00536484	0.0143776	0.00359374	0.0189267	0.016682	0.00126609	0.00193845	0.00277805	0.00246968	0.00683041	0	0.0027272	0.001135	0.00196153	0	0.00740066	0.00312784	0.00349278	0.00198126	0.00363981	0.00610933	0.00281415	0.0027011	0.00729947	0.00259877	0.00263518	0.00464187	0.00214913	0.00306501
SSX2	0.0015489	0.00107301	0.00122101	0.00160551	0.00154842	0.00235038	0.00103	0.000826711	0.00112659	0.00128118	0.001612	0.00275257	0.00100027	0.000905215	0.000831066	0.00138614	0.00136312	0.0010775	0.000746038	0.000528561	0.00106425	0.00188964	0.0012258	0.00428111	0	0.00121346	0.00123123	0.00139448	0.00122683	0.00178134	0.00438222	0.000799907	0.000568241	0.00120059	0.0035075	0.000482389	0.00195076	0.000979198	0.00119707	0.00240921	0.00207022	0.00100826	0.0035735	0.00224706	0.00123589	0.00185002	0.0011277	0.00150021	0.00163103
TSPY1	0.00052635	0.000173808	0.000592713	0.000936019	0.0012755	0.000416259	0.0019881	0.000173158	0	0.000119593	0.000408744	0.000639336	0.00022949	0	0.000293503	0.00040698	9.39024e-05	0.000239561	0	0.000550288	0.00108808	0.000644365	0.000133276	0	0	0.000892815	0.000323793	0.00084696	0.000386216	0.000532427	0.00487556	0.000192867	3.71528e-05	0.00163647	0	0.000367611	0.000309048	0.000397654	0.000296314	0.00105299	0.00103789	0.000428476	0.00221693	0.00377673	0.000119917	0.000684679	0.000464706	0.000142863	0.000660028
MAGEA9B	0.00200097	0.00161543	0.00138341	0.00353326	0.003791	0.00404792	0.00381048	0.00469431	0.00648781	0.00428089	0.00701609	0.00754784	0.00623027	0.00468177	0.00399545	0.00497026	0.00561317	0.00309723	0.0011783	0.00252669	0.00422891	0.000879563	0.00720626	0.0154767	0	0.00280952	0.00228841	0.00339251	0.00202705	0.0040866	0	0.00261982	0.00116619	0.001874	0	0.00117217	0.00382708	0.00254327	0.00225372	0.00377354	0.00398617	0.00101939	0.00375396	0.00529935	0.00317377	0.00353278	0.0038407	0.0060873	0.00260487
SSX4	0.00156097	0.00136248	0.00106337	0.00116134	0.00230554	0.00200014	0.00196667	0.00171651	0.000821818	0.00133858	0.00162047	0.00131369	0.00103475	0.0016844	0.00137081	0.0019448	0.00112537	0.000676	0.00233358	0.00132245	0.00145993	0.00115812	0.000695862	0	0	0.00202552	0.000995328	0.0017588	0.00134114	0.00115171	0	0.00110301	0.000804072	0.000318353	0	0.000849469	0.00194913	0.000803704	0.00079411	0.0024238	0.00309006	0.00073878	0.00109329	0.00260249	0.00165416	0.00150098	0.00108829	0.00121286	0.00113721
SSX2B	0.00151297	0.000980924	0.00138485	0.00132609	0.00177658	0.00198005	0.00307429	0.00100754	0.000564625	0.00139803	0.00256423	0.00243689	0.00163656	0.00156093	0.00149241	0.00222416	0.00126571	0.000734634	0.00174925	0.000705137	0.00144283	0.00115534	0.00131757	0.00304889	0.00552	0.000903512	0.000853249	0.00150093	0.000822721	0.00136148	0	0.000809033	0.000690282	0.000438706	0	0.000617389	0.00157605	0.000922056	0.00100439	0.00169864	0.00273356	0.000512128	0.00183657	0.00114453	0.00140065	0.00167839	0.00147016	0.0016081	0.00094507
MAGEA2	0.00151053	0.00128007	0.00114393	0.00714184	0.00558295	0.00409633	0.000570476	0.00114614	0.00101099	0.00109747	0.000850977	0.00124493	0.00124385	0.00079933	0.000589071	0.00135488	0.000951264	0.000769224	0.000554566	0.000681799	0.00125314	0.00112907	0.000236149	0.00264889	0.002647	0.000760965	0.000884052	0.00068488	0.00100586	0.000548893	0	0.000943469	0.000594868	0.000674318	0	0.000791265	0.00181527	0.000823086	0.000478889	0.00120955	0.00124461	0.000304579	0.00127354	0.00139458	0.000989816	0.001536	0.00155791	0.00106075	0.000395499
CTAG1A	0.0228915	0.0162213	0.0109842	0.0627456	0.0625202	0.0817375	0.0428876	0.00661362	0.0108039	0.00860797	0.0152161	0.0234832	0.0139617	0.0135179	0.010291	0.0126557	0.00950053	0.00956718	0.00954327	0.00470158	0.0215717	0.0161916	0.0114942	0.00615444	0.016297	0.0517257	0.0373203	0.0691518	0.0153069	0.0573099	0.0614978	0.00933009	0.0065138	0.00673847	0	0.00521708	0.0284067	0.0099987	0.0113289	0.0257707	0.0262275	0.00746713	0.0186341	0.0269916	0.0195994	0.0224538	0.0232181	0.0178039	0.018393
CSAG2	0.00209107	0.00396174	0.00189806	0.00739986	0.00765517	0.00514247	0.0386643	0.0175474	0.0163439	0.0177327	0.00408256	0.00731552	0.0149377	0.0154154	0.027425	0.0276081	0.0120701	0.0164052	0.0211409	0.0261762	0.0031871	0.000644921	0.0390411	0.0704778	0	0.00289611	0.00354389	0.00199293	0.0021231	0.00226289	0	0.00186676	0.00199343	0.0194702	0.0374175	0.00365925	0.0146513	0.00183463	0.00152451	0.00280893	0.00460356	0.000372652	0.0038253	0.0486872	0.0288941	0.0123128	0.0157834	0.184959	0.00125599
CSAG3	0.00414879	0.0104202	0.0048012	0.0115206	0.0087915	0.00618065	0.0404967	0.063898	0.0292673	0.053338	0.0108116	0.0158437	0.0403059	0.0325765	0.0947658	0.080467	0.0320598	0.0512704	0.0761979	0.0999912	0.0110754	0.00235974	0.209878	0.0691656	0.043879	0.00668831	0.00788127	0.00469272	0.00804587	0.00570276	0.0184556	0.00460196	0.00720414	0.111957	0.03682	0.0319367	0.0360239	0.00459877	0.004591	0.01012	0.00850922	0.00103421	0.0117268	0.244623	0.10688	0.0558812	0.0957178	0.919088	0.00428886
SPANXN2	0.00109339	0.000395545	0.00268105	0.002129	0.00268525	0.000842896	0	0.004245	0.00616943	0.00077878	0.00353209	0.00102174	0.00116835	0.00191952	0.00141076	0.00189064	0.00157496	0.000616195	0.000627925	0.0102634	0.00533606	0.00417581	0.00144713	0.00383222	0	0.00130062	0.00154608	0.00135643	0.00159798	0.00473666	0.01865	0.00140709	0.000611366	0.000977529	0	0.00111575	0.00131137	0.000858333	0.00289469	0.00150829	0.00160306	0.00169616	0.0014912	0.00406776	0.00153959	0.000850428	0.00214979	0.00212286	0.00174602
CALR3	0.0455457	0.0248381	0.046517	0.0284766	0.027068	0.0235201	0.027409	0.0337746	0.0205573	0.0279409	0.016099	0.0233479	0.0238848	0.0209726	0.0240021	0.0276428	0.0202319	0.0153169	0.0344999	0.0204549	0.113205	0.0651345	0.17627	0.105824	0.006878	0.0251828	0.0299948	0.0172915	0.0383436	0.0495207	0.0939533	0.0148028	0.0113424	0.032332	0.0766475	0.0620138	0.0398174	0.0385167	0.0459974	0.0651149	0.0438324	0.0450658	0.0481271	0.151092	0.0439456	0.0466812	0.0490442	0.0584089	0.0324072
CT45A3	0.000376531	0.000202107	0.000468372	0.00152243	0.000570542	0.000600513	0	0.00280125	0.00229125	0.00232492	0.000469628	0.00117448	0.000852824	0.00105335	0.00281838	0.00178669	0.00242878	0.00162107	0.00120535	0.0012259	0.00146682	0.00133772	0.00253609	0.0150667	0	0.000822708	0.000573054	0.0009828	0.000657027	0.00152979	0	0.000304872	0.00011375	0	0	0.000321637	0.000462232	0.000265617	0.000718456	0.000686817	0.0006395	0.000127317	0.00510092	0.000898408	0.000275613	0.000437603	0.000142674	0	0.000399554
NXF2	0.0014541	0.00103784	0.0012622	0.00151273	0.00124217	0.000776742	0	0.00122928	0.00120231	0.00214587	0.00218966	0.00363798	0.00228772	0.00159131	0.00173488	0.00519804	0.00274528	0.000849259	0.00159581	0.00081977	0.000951316	0.00139863	0.000844454	0	0.003454	0.00127602	0.000630404	0.000923856	0.000727874	0.00107897	0.00816333	0.000719207	0.000427775	0.000822412	0.0027625	0.000525128	0.00515734	0.00106901	0.000718174	0.00159596	0.002514	0.00114581	0.0268758	0.00165131	0.000832732	0.00103371	0.00124193	0.00153194	0.0018122
NXF2B	0.0018123	0.00159198	0.00280345	0.00207882	0.00180511	0.00190947	0.000652857	0.00464787	0.0028609	0.00410288	0.014842	0.0193163	0.00466427	0.00276579	0.00560312	0.0161069	0.00543267	0.00150823	0.00260405	0.00228954	0.00223044	0.000778484	0.000799161	0	0.011354	0.00154766	0.00150912	0.00167092	0.000683841	0.00171822	0.0696256	0.00144227	0.000387396	0.00332716	0	0.00128028	0.0224905	0.00373188	0.000509315	0.00190137	0.00229211	0.00234112	0.147647	0.00337904	0.00123051	0.00111923	0.00247145	0.00136668	0.00518787
SSX4B	0.00243526	0.00236994	0.0013495	0.00319178	0.00192754	0.00397374	0.00215762	0.00283553	0.00146875	0.00124898	0.00257767	0.00150021	0.00114525	0.00196837	0.00211492	0.00333322	0.00175809	0.000606585	0.000985031	9.8777e-05	0.00207068	0.00110958	0.00140529	0	0	0.00142775	0.0014402	0.00140003	0.00137829	0.00203414	0.00483333	0.00155179	0.00137271	0	0	0.000767611	0.0048308	0.00146383	0.00119603	0.00510281	0.00163206	0.00111207	0.00542541	0.00214939	0.00261621	0.00291766	0.00108283	0.00321344	0.00144858
CT45A9	0	0	0	0	0	0	0	0	0	0.000105976	0.000185674	0	0	0	0	0	0	0	0.000192642	0	0	0	0.000293391	0	0	0	0	0	0	9.48738e-05	0	0	0	0	0	0	0	0	0	0	0	0	0	0	0	0	0	0	0
CT45A2	0	0	0	0	0	0	0	0.000142237	0.000542102	0.000155203	0	0.00010361	0	0	0	6.84158e-05	0.000131341	0	0	0.000133309	0	0	0	0	0	0	0	0	0	0	0	0	0	0	0	0	0	0	0	0	0	0	0	0	0	0	0	0	0
CT45A7	0	0	0	0	0	0	0	0.000388355	0.000717557	0.000434106	0	0.000137137	0	0	0	9.05446e-05	0.000173862	0	0	0.000176475	0	0	0	0	0	0	0	0	0	0	0	0	0	0	0	0	0	0	0	0	0	0	0	0	0	0	0	0	0
TPTE	0.0114531	0.0135105	0.0159477	0.0134101	0.0141683	0.0106334	0.0116476	0.00354895	0.00387849	0.00466935	0.00768842	0.0163877	0.00746091	0.00399309	0.00240323	0.023294	0.00713017	0.0039621	0.010746	0.0071383	0.0606398	0.00994274	0.0134904	0.00922	0.018208	0.0131406	0.0123954	0.0121784	0.0129576	0.0378378	0.0168244	0.00750328	0.00561056	0.0188617	0.016195	0.022121	0.0149934	0.013032	0.0159896	0.0156647	0.0357535	0.0127922	0.11095	0.117503	0.0218409	0.0217838	0.0257426	0.0133845	0.106393
[truncated: 5 more columns]

## Sheet: 92 CTA GDC
92 CTAs: gene expression positive ratios in tumors
gene	BLCA	BRCA	CESC	CHOL	COAD	ESCA	GBM	HNSC	KICH	KIRC	KIRP	LGG	LIHC	LUAD	LUSC	OV	PAAD	PRAD	READ	SKCM	STAD	TGCT	THCA	UCEC
MAGEC2	0.145985	0.0652174	0.0522876	0.0277778	0.0106157	0.0740741	0.0238095	0.101594	0.0153846	0.0149533	0.0242215	0.00189036	0.28877	0.13308	0.161677	0.110818	0.00561798	0.0280561	0.0538922	0.481953	0.088	0.525641	0	0.060219
SPO11	0	0.00271739	0	0	0.00212314	0	0	0	0	0	0	0	0	0	0	0.00263852	0	0	0	0	0	0	0	0.00182482
MAGEB2	0.0827251	0.0208333	0.0359477	0	0.0318471	0.123457	0	0.195219	0.0153846	0.0149533	0	0.00189036	0.176471	0.0912548	0.277445	0.0448549	0.011236	0.00200401	0.0538922	0.199575	0.088	0.807692	0	0.0346715
LUZP4	0.00973236	0	0	0	0.00212314	0.0185185	0	0.00199203	0	0	0	0	0.0294118	0.00570342	0.00598802	0.00263852	0	0	0	0.0530786	0.008	0.74359	0	0
ADAM2	0.0364964	0.0217391	0.00653595	0	0	0.00617284	0	0	0.492308	0.0149533	0.00346021	0	0	0.0209125	0.00998004	0	0	0.38477	0	0	0	0.0128205	0	0.0310219
MAGEB4	0	0.0353261	0	0	0	0	0	0.00199203	0	0	0	0	0	0	0	0	0	0	0	0	0	0	0	0.00182482
GJA8	0.00243309	0.00181159	0	0	0.00212314	0	0	0	0	0.00373832	0.0207612	0	0	0	0.00199601	0.108179	0	0	0	0	0	0	0	0.0109489
MAGEA9	0.311436	0.0181159	0.0163399	0	0.0212314	0.135802	0.00595238	0.121514	0	0	0.0103806	0	0.0106952	0.039924	0.361277	0.0897098	0	0	0.011976	0.0573248	0.101333	0.0128205	0	0.080292
CTCFL	0.0170316	0.00181159	0.29085	0	0	0.0493827	0	0.0537849	0	0.00186916	0	0	0	0.0171103	0.115768	0.559367	0.00561798	0	0.00598802	0.10828	0.0506667	0.0128205	0	0.129562
MAGEA10	0.316302	0.0262681	0.0784314	0	0.0106157	0.17284	0	0.145418	0	0.00560748	0.0103806	0	0.0320856	0.0988593	0.311377	0.0844327	0.00561798	0	0.0479042	0.284501	0.117333	0.121795	0	0.0693431
SSX1	0.0583942	0.0371377	0.00980392	0.0277778	0.00424628	0.0432099	0	0.0139442	0.0153846	0.0149533	0.0103806	0	0.355615	0.0646388	0.0179641	0.0765172	0.00561798	0.00601202	0.00598802	0.382166	0.056	0.0320513	0.701961	0.0109489
RHOXF2	0.0121655	0.000905797	0	0	0	0.00617284	0	0	0.0461538	0.00373832	0.00346021	0	0.026738	0.00570342	0.00199601	0.00263852	0	0	0	0.0127389	0.024	0.0769231	0.00196078	0.00364964
FTHL17	0.0973236	0.0244565	0.0196078	0	0.00212314	0.0308642	0	0.0458167	0	0	0	0	0.026738	0.026616	0.0698603	0.0105541	0	0	0	0.00424628	0.0133333	0.448718	0	0.0109489
AKAP4	0	0	0.00326797	0	0.00636943	0	0	0	0	0	0.00346021	0	0	0	0	0	0	0	0.0299401	0	0.0106667	0.025641	0	0
CPXCR1	0	0	0	0	0	0	0	0	0	0	0	0.00189036	0	0	0	0.00527704	0	0	0	0	0	0	0	0.00912409
MAGEA4	0.333333	0.0552536	0.205882	0	0.0467091	0.308642	0.00595238	0.410359	0	0.00747664	0.00692042	0	0.0427807	0.10076	0.582834	0.319261	0.00561798	0.00200401	0.101796	0.214437	0.173333	0.307692	0	0.129562
MAGEC1	0.0656934	0.0262681	0.00653595	0	0.0106157	0.0679012	0.0119048	0.0836653	0.0153846	0.00373832	0.0138408	0.00567108	0.176471	0.0779468	0.115768	0.129288	0	0.0160321	0.0299401	0.363057	0.056	0.448718	0	0.0255474
PAGE5	0.0608273	0.0244565	0.00653595	0.0277778	0.00636943	0.0246914	0.00595238	0.0139442	0.0153846	0.00747664	0.0242215	0	0.205882	0.0551331	0.0179641	0.0343008	0.00561798	0.00400802	0.00598802	0.292994	0.048	0.288462	0	0.0273723
DPPA2	0.0705596	0.00724638	0.00980392	0	0	0.0802469	0	0.0876494	0	0.00934579	0.0449827	0	0.00534759	0.0342205	0.155689	0.105541	0.00561798	0.00200401	0.00598802	0.014862	0.0373333	0.871795	0	0.0711679
CAGE1	0.00486618	0.000905797	0.00326797	0	0	0	0	0	0	0	0	0	0.013369	0.00570342	0.00598802	0.00791557	0	0	0	0	0	0	0	0
SSX3	0.00973236	0.00362319	0	0	0	0.0123457	0	0.00199203	0	0.00373832	0	0	0.0454545	0.00190114	0	0	0.00561798	0	0.00598802	0.00849257	0.0106667	0.025641	0.00196078	0.00364964
PASD1	0.0121655	0.00362319	0.00653595	0	0	0.0185185	0	0.0139442	0.0153846	0.00373832	0.00346021	0	0.00534759	0.0304183	0.0319361	0.0211082	0	0	0	0.0700637	0.0506667	0.25	0	0.0237226
POTED	0	0	0	0	0	0	0	0	0	0	0	0	0	0	0	0	0	0	0	0	0	0	0	0
PLAC1	0.311436	0.219203	0.281046	0	0.089172	0.160494	0.0238095	0.36255	0	0.00373832	0.00692042	0	0.0106952	0.136882	0.301397	0.168865	0.0280899	0	0.0958084	0.0424628	0.0746667	0.294872	0	0.0529197
XAGE3	0.0218978	0.00634058	0.00980392	0	0.00212314	0	0	0.0139442	0	0.00373832	0.00346021	0	0.026738	0.0209125	0.0199601	0.055409	0	0	0	0.0679406	0.0106667	0.0448718	0.00196078	0.0291971
FAM46D	0	0.000905797	0	0	0	0	0	0	0	0	0	0	0	0	0	0	0	0	0	0	0	0	0	0
GOLGA6L2	0	0.000905797	0.00653595	0	0.00424628	0	0.00595238	0	0	0.0336449	0	0.0964083	0	0	0.011976	0	0	0	0.00598802	0	0.00266667	0.0128205	0	0.00364964
MAGEB6	0.00243309	0.00181159	0	0	0	0.00617284	0	0.0278884	0	0	0	0	0.00534759	0.00190114	0.0219561	0.00791557	0	0	0	0.0339703	0	0.147436	0	0.00364964
FMR1NB	0.00973236	0.0117754	0.00326797	0	0.00212314	0.0246914	0	0.00796813	0.0153846	0.00560748	0	0	0.0187166	0.0152091	0.00798403	0.00263852	0.00561798	0.00801603	0	0.014862	0.016	0.121795	0	0.00364964
ODF3	0	0.000905797	0	0	0.00212314	0	0	0	0	0.00186916	0	0	0	0.00380228	0	0	0	0.00200401	0	0	0	0	0	0
POTEC	0	0.0389493	0	0	0	0	0	0	0	0	0	0	0	0	0	0.0290237	0	0.00200401	0	0	0	0	0	0
MAGEA2B	0	0	0	0	0	0	0	0	0	0	0	0	0	0	0	0	0	0	0	0	0	0	0	0
TFDP3	0.00243309	0.0996377	0.00653595	0	0.00212314	0	0	0	0	0.00186916	0	0	0.0989305	0.00190114	0.00399202	0	0	0	0	0.0276008	0.00266667	0.269231	0	0.00182482
CTAG1B	0	0	0	0	0	0	0	0	0	0	0	0	0	0	0	0.00791557	0	0	0	0.00636943	0.008	0	0	0
ODF4	0.0364964	0.000905797	0.00653595	0	0.00212314	0	0	0.00199203	0	0.00186916	0	0	0	0	0	0	0	0.00200401	0	0	0.00266667	0.00641026	0	0
DDX53	0.0218978	0.00634058	0.00326797	0	0.0106157	0.0246914	0	0.0239044	0	0.00186916	0.00346021	0	0.0668449	0.0228137	0.00798403	0.00263852	0.00561798	0.00200401	0.0299401	0.0127389	0.0186667	0.294872	0	0.00729927
MAGEA11	0.150852	0.0172101	0.0457516	0	0.121019	0.240741	0	0.266932	0.0153846	0.00373832	0.0103806	0	0.0614973	0.0342205	0.421158	0.23219	0	0.00200401	0.173653	0.191083	0.106667	0.0641026	0	0.114964
POTEG	0	0	0	0	0	0	0	0	0	0.00186916	0	0	0	0	0	0	0	0.0220441	0	0	0	0	0	0
POTEE	0.00243309	0.00452899	0	0	0.00212314	0.0864198	0	0	0	0	0	0	0	0	0.00399202	0.00263852	0	0.0160321	0	0	0.056	0	0	0.00547445
MAGEB5	0	0	0	0	0	0	0	0	0	0	0	0	0	0	0	0	0	0	0	0	0.00266667	0	0	0
POTEA	0	0	0	0	0	0	0	0	0	0	0	0	0	0	0.00199601	0.00263852	0	0	0	0	0	0	0	0
GAGE2A	0.0681265	0.0144928	0.0294118	0	0.00849257	0.0617284	0.00595238	0.059761	0.0153846	0.00186916	0.0207612	0	0.0828877	0.0361217	0.113772	0.0923483	0	0	0.00598802	0.125265	0.0533333	0.0512821	0	0.0383212
SPANXN3	0	0	0	0	0.00212314	0	0	0.00796813	0	0.00373832	0	0	0	0.00380228	0	0	0.00561798	0	0	0.00212314	0.00266667	0.00641026	0	0
SPANXN4	0	0	0	0	0	0	0	0	0	0	0	0	0	0.00190114	0	0	0	0	0	0.00212314	0	0	0	0
SPANXD	0.0389294	0.00452899	0.00653595	0.0277778	0	0.037037	0.00595238	0.0478088	0	0	0.00346021	0	0.0026738	0.0190114	0.0219561	0.00263852	0.00561798	0	0	0.00636943	0.008	0.00641026	0	0.00182482
MAGEA6	0.423358	0.108696	0.124183	0.0277778	0.125265	0.407407	0	0.386454	0.0153846	0.00934579	0.0207612	0.00378072	0.262032	0.214829	0.479042	0.0316623	0.0168539	0.0280561	0.143713	0.609342	0.314667	0.115385	0	0.109489
SPANXA1	0.00243309	0.00271739	0	0	0	0.00617284	0	0.00398406	0	0	0	0	0	0.00190114	0.00399202	0	0	0	0	0	0	0	0	0
POTEH	0.00486618	0.000905797	0	0	0	0	0	0	0	0.00186916	0	0	0	0	0.00199601	0	0	0.472946	0	0	0	0	0	0.00364964
SPANXC	0.053528	0.0172101	0.0196078	0.0277778	0	0.0617284	0.00595238	0.0776892	0	0.00373832	0.00346021	0	0	0.0323194	0.0379242	0.00527704	0.00561798	0	0	0.0106157	0.0106667	0.0320513	0	0.00182482
MAGEA1	0.218978	0.0969203	0.120915	0.0555556	0.029724	0.228395	0.00595238	0.159363	0.0153846	0.00373832	0.0103806	0	0.40107	0.123574	0.373253	0.0976253	0.011236	0.0240481	0.0239521	0.33121	0.154667	0.153846	0	0.0565693
MAGEB3	0	0	0	0	0	0	0	0	0	0	0	0	0	0	0	0.00263852	0	0	0	0.00212314	0	0.0320513	0	0
SPANXN1	0	0	0	0	0	0	0	0	0	0	0	0	0	0	0	0	0	0	0	0.00636943	0	0.00641026	0	0.00182482
SPANXA2	0	0	0	0	0	0.0123457	0	0	0	0	0	0	0	0	0	0	0	0	0	0	0	0	0	0
CT83	0.155718	0.140399	0.199346	0.0277778	0.0615711	0.450617	0	0.061753	0	0.00186916	0.0138408	0	0.0802139	0.48289	0.303393	0.0237467	0.213483	0.00801603	0.0898204	0.0191083	0.541333	0.416667	0.00588235	0.0273723
SPANXN5	0	0.000905797	0	0	0	0.00617284	0	0.00199203	0	0	0	0	0	0	0	0	0	0	0	0	0	0	0	0
XAGE1A	0	0	0	0	0	0	0	0	0	0	0	0	0	0.00570342	0	0	0	0	0	0	0.0106667	0	0	0
XAGE1B	0	0.000905797	0	0	0	0	0	0	0	0	0	0	0	0.0095057	0	0	0	0	0	0	0.00533333	0	0	0
SLCO6A1	0.0170316	0	0.00653595	0	0	0.00617284	0	0.00199203	0	0	0	0	0.026738	0.00760456	0.00399202	0.00527704	0	0.00200401	0	0	0.00266667	0.00641026	0	0.0109489
GAGE1	0.0291971	0.0117754	0.00980392	0	0	0.00617284	0	0.0139442	0	0.00186916	0.00346021	0	0.0374332	0.0190114	0.0379242	0.0369393	0	0	0	0.0615711	0.0186667	0.0128205	0	0.00729927
CTAGE1	0	0	0	0	0	0	0.00595238	0	0	0	0	0	0	0	0	0.00263852	0	0	0	0	0	0	0	0
MAGEB1	0.0194647	0.0262681	0	0	0.00424628	0.0432099	0	0.0338645	0.0153846	0.00747664	0.00692042	0	0.0695187	0.0285171	0.0558882	0.0158311	0.00561798	0	0	0.142251	0.0266667	0.679487	0	0.00729927
GAGE12G	0	0	0	0	0	0	0	0	0	0	0	0	0	0	0	0	0	0	0	0	0	0	0	0
MAGEA3	0.445255	0.118659	0.156863	0.0277778	0.131635	0.41358	0.00595238	0.404382	0.0153846	0.011215	0.0242215	0.0113422	0.291444	0.237643	0.50499	0.0395778	0.0168539	0.0300601	0.155689	0.645435	0.341333	0.153846	0	0.0948905
CT47A6	0	0	0	0	0	0	0	0	0	0	0	0	0	0	0	0	0	0	0	0	0	0	0	0
CT47A12	0	0	0	0	0	0	0	0	0	0	0	0	0	0	0	0	0	0	0	0	0	0	0	0
SPANXB1	0.0900243	0.0615942	0.0261438	0.0277778	0.0127389	0.0802469	0.00595238	0.153386	0.0153846	0.0224299	0.0138408	0	0.013369	0.0513308	0.0738523	0.0158311	0.011236	0.00200401	0.0179641	0.0169851	0.032	0.134615	0.00196078	0.00547445
CT47A7	0	0	0	0	0	0	0	0	0	0	0	0	0	0	0	0	0	0	0	0	0	0	0	0
CT45A5	0	0	0	0	0.00212314	0.0185185	0	0.00398406	0	0	0	0	0	0	0.00798403	0.0870712	0	0	0.00598802	0.00636943	0.024	0	0	0.020073
TSPY3	0.00729927	0	0	0	0	0	0	0.00199203	0	0	0	0	0.00534759	0.00570342	0.00798403	0	0	0	0	0.00849257	0.00266667	0.141026	0	0
POTEB	0	0	0	0	0	0	0	0	0	0	0	0	0	0	0	0	0	0	0	0	0	0	0	0
CT47A1	0	0	0	0	0	0	0	0	0	0	0	0	0	0	0	0	0	0	0	0	0	0	0	0
TSPY10	0.00486618	0	0	0	0	0	0	0.00796813	0	0	0	0	0.00802139	0.00190114	0.0179641	0	0	0	0	0.014862	0.00266667	0.211538	0	0
CT47B1	0	0	0	0	0	0	0	0	0	0	0.00692042	0	0.00534759	0.00380228	0.00199601	0	0	0	0	0.00212314	0	0.00641026	0	0
SSX2	0	0	0	0	0	0	0	0	0	0	0	0	0	0	0	0	0	0	0	0	0	0	0	0
TSPY1	0.00973236	0	0	0	0	0.0123457	0	0.00796813	0	0	0	0	0.0106952	0.00570342	0.0219561	0	0	0	0	0.0191083	0.00266667	0.224359	0	0
MAGEA9B	0.0948905	0.00634058	0.00326797	0	0.00636943	0.0432099	0	0.0478088	0	0	0	0	0.00534759	0.00760456	0.143713	0.0263852	0	0	0.00598802	0.014862	0.032	0	0	0.0310219
SSX4	0	0	0	0	0	0	0	0	0	0	0	0	0	0	0	0	0	0	0	0	0.00266667	0	0	0
SSX2B	0	0	0	0	0	0	0	0	0	0	0	0	0	0	0	0	0	0	0	0	0	0	0	0
MAGEA2	0	0	0	0	0	0	0	0	0	0	0	0	0	0	0	0	0	0	0	0	0	0	0	0
CTAG1A	0.00243309	0	0	0	0	0	0	0	0	0	0	0	0	0	0.00199601	0.0158311	0	0	0	0.00212314	0.0106667	0	0	0
CSAG2	0.26764	0.0561594	0.130719	0.0277778	0.0254777	0.166667	0.0119048	0.243028	0.0153846	0.00373832	0.0103806	0.00189036	0.128342	0.119772	0.255489	0.0791557	0.00561798	0.00400802	0.0778443	0.464968	0.173333	0.0320513	0.00196078	0.0456204
CSAG3	0.335766	0.0842391	0.166667	0.0277778	0.044586	0.296296	0.0119048	0.358566	0.0153846	0.00747664	0.0103806	0.00378072	0.221925	0.142586	0.361277	0.16095	0.00561798	0.0140281	0.0958084	0.532909	0.272	0.0512821	0.00392157	0.0675182
SPANXN2	0	0	0	0	0	0	0	0	0	0	0	0	0	0	0	0	0	0	0	0	0	0	0	0
CALR3	0	0.00181159	0	0	0	0	0.00595238	0	0	0.00186916	0	0	0.00534759	0.00380228	0	0.00791557	0	0	0	0	0.00266667	0.00641026	0	0.00182482
CT45A3	0.00243309	0	0	0	0	0	0	0	0	0	0	0	0	0	0.00199601	0.0184697	0	0	0	0.0106157	0	0	0	0.00182482
NXF2	0	0	0	0	0	0	0	0	0	0	0	0	0	0	0	0	0	0	0	0	0	0	0	0
NXF2B	0	0	0	0	0	0	0	0	0	0	0	0	0	0	0	0	0	0	0	0	0	0	0	0
SSX4B	0	0	0	0	0	0.00617284	0	0	0	0	0	0	0	0	0	0	0	0	0	0	0.00266667	0	0	0
CT45A9	0	0	0	0	0	0	0	0	0	0	0	0	0	0	0	0	0	0	0	0	0	0	0	0
CT45A2	0	0	0	0	0	0	0	0	0	0	0	0	0	0	0	0	0	0	0	0	0	0	0	0
CT45A7	0	0	0	0	0	0	0	0	0	0	0	0	0	0	0	0	0	0	0	0	0	0	0	0
TPTE	0.0243309	0.00181159	0	0	0	0.0123457	0	0.00199203	0	0	0	0	0.0026738	0.00570342	0.00598802	0	0	0.00200401	0	0.0276008	0.008	0.301282	0	0

## Sheet: top 5 positive expression ratio
Ranking of positive gene expression ratios of 92 CTAs in LUAD, LUSC, STAD, BRCA
gene	LUAD	LUSC	STAD	BRCA	Sum
CT83	0.48289	0.303393	0.541333	0.140399	1.46802
MAGEA3	0.237643	0.50499	0.341333	0.118659	1.20263
MAGEA6	0.214829	0.479042	0.314667	0.108696	1.11723
MAGEA4	0.10076	0.582834	0.173333	0.0552536	0.912182
CSAG3	0.142586	0.361277	0.272	0.0842391	0.860102
MAGEA1	0.123574	0.373253	0.154667	0.0969203	0.748415
PLAC1	0.136882	0.301397	0.0746667	0.219203	0.732149
CSAG2	0.119772	0.255489	0.173333	0.0561594	0.604754
MAGEA11	0.0342205	0.421158	0.106667	0.0172101	0.579255
MAGEA10	0.0988593	0.311377	0.117333	0.0262681	0.553838
MAGEA9	0.039924	0.361277	0.101333	0.0181159	0.520651
MAGEB2	0.0912548	0.277445	0.088	0.0208333	0.477533
MAGEC2	0.13308	0.161677	0.088	0.0652174	0.447974
MAGEC1	0.0779468	0.115768	0.056	0.0262681	0.275983
DPPA2	0.0342205	0.155689	0.0373333	0.00724638	0.234489
SPANXB1	0.0513308	0.0738523	0.032	0.0615942	0.218777
GAGE2A	0.0361217	0.113772	0.0533333	0.0144928	0.21772
MAGEA9B	0.00760456	0.143713	0.032	0.00634058	0.189658
CTCFL	0.0171103	0.115768	0.0506667	0.00181159	0.185357
SSX1	0.0646388	0.0179641	0.056	0.0371377	0.175741
PAGE5	0.0551331	0.0179641	0.048	0.0244565	0.145554
MAGEB1	0.0285171	0.0558882	0.0266667	0.0262681	0.13734
FTHL17	0.026616	0.0698603	0.0133333	0.0244565	0.134266
PASD1	0.0304183	0.0319361	0.0506667	0.00362319	0.116644
TFDP3	0.00190114	0.00399202	0.00266667	0.0996377	0.108198
SPANXC	0.0323194	0.0379242	0.0106667	0.0172101	0.09812
GAGE1	0.0190114	0.0379242	0.0186667	0.0117754	0.087378
POTEE	0	0.00399202	0.056	0.00452899	0.064521
XAGE3	0.0209125	0.0199601	0.0106667	0.00634058	0.05788
DDX53	0.0228137	0.00798403	0.0186667	0.00634058	0.055805
SPANXD	0.0190114	0.0219561	0.008	0.00452899	0.053496
ADAM2	0.0209125	0.00998004	0	0.0217391	0.052632
FMR1NB	0.0152091	0.00798403	0.016	0.0117754	0.050969
POTEC	0	0	0	0.0389493	0.038949
MAGEB4	0	0	0	0.0353261	0.035326
RHOXF2	0.00570342	0.00199601	0.024	0.000905797	0.032605
CT45A5	0	0.00798403	0.024	0	0.031984
TSPY1	0.00570342	0.0219561	0.00266667	0	0.030326
MAGEB6	0.00190114	0.0219561	0	0.00181159	0.025669
TSPY10	0.00190114	0.0179641	0.00266667	0	0.022532
TPTE	0.00570342	0.00598802	0.008	0.00181159	0.021503
LUZP4	0.00570342	0.00598802	0.008	0	0.019691
XAGE1A	0.00570342	0	0.0106667	0	0.01637
TSPY3	0.00570342	0.00798403	0.00266667	0	0.016354
SSX3	0.00190114	0	0.0106667	0.00362319	0.016191
XAGE1B	0.0095057	0	0.00533333	0.000905797	0.015745
GOLGA6L2	0	0.011976	0.00266667	0.000905797	0.015549
SLCO6A1	0.00760456	0.00399202	0.00266667	0	0.014263
CTAG1A	0	0.00199601	0.0106667	0	0.012663
CAGE1	0.00570342	0.00598802	0	0.000905797	0.012597
AKAP4	0	0	0.0106667	0	0.010667
SPANXA1	0.00190114	0.00399202	0	0.00271739	0.008611
CALR3	0.00380228	0	0.00266667	0.00181159	0.008281
CTAG1B	0	0	0.008	0	0.008
SPANXN3	0.00380228	0	0.00266667	0	0.006469
CT47B1	0.00380228	0.00199601	0	0	0.005798
ODF3	0.00380228	0	0	0.000905797	0.004708
GJA8	0	0.00199601	0	0.00181159	0.003808
ODF4	0	0	0.00266667	0.000905797	0.003572
POTEH	0	0.00199601	0	0.000905797	0.002902
SPO11	0	0	0	0.00271739	0.002717
MAGEB5	0	0	0.00266667	0	0.002667
SSX4	0	0	0.00266667	0	0.002667
SSX4B	0	0	0.00266667	0	0.002667
POTEA	0	0.00199601	0	0	0.001996
CT45A3	0	0.00199601	0	0	0.001996
SPANXN4	0.00190114	0	0	0	0.001901
FAM46D	0	0	0	0.000905797	0.000906
SPANXN5	0	0	0	0.000905797	0.000906
CPXCR1	0	0	0	0	0
POTED	0	0	0	0	0
MAGEA2B	0	0	0	0	0
POTEG	0	0	0	0	0
MAGEB3	0	0	0	0	0
SPANXN1	0	0	0	0	0
SPANXA2	0	0	0	0	0
CTAGE1	0	0	0	0	0
GAGE12G	0	0	0	0	0
CT47A6	0	0	0	0	0
CT47A12	0	0	0	0	0
CT47A7	0	0	0	0	0
POTEB	0	0	0	0	0
CT47A1	0	0	0	0	0
SSX2	0	0	0	0	0
SSX2B	0	0	0	0	0
MAGEA2	0	0	0	0	0
SPANXN2	0	0	0	0	0
NXF2	0	0	0	0	0
NXF2B	0	0	0	0	0
CT45A9	0	0	0	0	0
CT45A2	0	0	0	0	0
CT45A7	0	0	0	0	0

## Sheet: 5 CTAs expression level
Gene expression levels of 5 CTAs in LUAD, LUSC, STAD, BRCA (FPKM)
gene	BRCA	LUAD	LUSC	STAD
CT83	7.82348	7.68367	14.6497	11.7033
MAGEA3	0.617662	1.57367	0.979684	0.235844
MAGEA6	47.5977	42.2469	30.6835	36.1756
MAGEA4	0.201692	0.248665	0.196989	0.233562
CSAG3	1.44625	3.01218	4.79111	0.664033
MAGEA1	0.143754	1.83613	3.40556	1.84773
PLAC1	0.432745	0.372199	0.364755	0.304458
CSAG2	0.0154765	0.0692263	0.100478	0.171451
MAGEA11	0.0132344	0.114699	1.13633	0.379524
MAGEA10	9.08229	3.64306	14.7426	10.0528
MAGEA9	0.802373	0.00561804	0.0342484	0.00946564
MAGEB2	8.71655	10.8378	8.89272	7.46624
MAGEC2	0.442823	1.48282	0.293312	0.564252
MAGEC1	0.00805273	0.0166952	0.0285917	0.0863458
DPPA2	0.0118944	0.0116364	0.00855247	0.0149439
SPANXB1	0.00141652	0.00102475	0.00188167	0.050273
GAGE2A	0.544683	2.1375	6.22116	4.02086
MAGEA9B	0.0617156	0.0628844	0.048637	0.0660466
CTCFL	0.156407	0.0802855	0.0861459	0.160392
SSX1	0.285648	0.984249	0.817198	0.75407
PAGE5	0.140644	0.331134	0.203348	0.157247
MAGEB1	0.0114741	0.0384057	0.0580684	0.057734
FTHL17	0.857929	0.505103	0.168268	0.300161
PASD1	0.475896	0.430432	0.497937	0.262681
TFDP3	0.00796822	0.00350307	0.00553986	0.0188442
SPANXC	0.790178	0.841683	0.536833	0.665323
GAGE1	5.67207	4.18325	7.84145	4.96737
POTEE	0.229742	1.52782	3.77464	0.976704
XAGE3	0.786916	0.989338	0.941505	1.83781
DDX53	0.0168034	0.0315284	0.404722	0.104697
SPANXD	0.00462555	0.0348911	0.018549	0.222261
ADAM2	0.0278605	0.00282067	0.00292041	0.0139111
FMR1NB	3.07883	0.545002	1.16601	3.25345
POTEC	0.160739	0.00100298	0.00418256	0.00428601
MAGEB4	2.59649	7.57661	5.0523	3.14912
RHOXF2	4.57344	2.4641	2.6133	2.05635
CT45A5	0.297946	0.29286	0.331712	0.156946
TSPY1	0.190007	0.657499	1.01171	0.932149
MAGEB6	16.3388	10.7534	11.6805	6.58254
TSPY10	1.08577	0.620821	0.540472	0.368472
TPTE	3.10478	5.01122	3.29283	4.80128
LUZP4	0.653759	2.03174	3.60781	2.147
XAGE1A	0.018232	0.349568	0.144018	0.0526652
TSPY3	1.51392	4.63626	34.0963	6.21553
SSX3	0.162661	0.0837107	0.061525	0.0285827
XAGE1B	0.024576	0.182483	0.0626075	0.101579
GOLGA6L2	0.016889	0.019182	0.19825	0.062311
SLCO6A1	0.701938	1.13134	0.91259	0.463618
CTAG1A	0.302913	0.252427	1.54194	0.571868
CAGE1	2.79274	2.32994	5.5484	4.12984
AKAP4	0.219999	1.246	5.51836	1.3517
SPANXA1	0.55442	0.539975	1.48364	0.174932
CALR3	0.0491871	0.0475704	0.159985	0.0408091
CTAG1B	0.00275617	0.00420101	0.00541357	0.0235705
SPANXN3	0.0811721	0.0839707	0.0523399	0.107688
CT47B1	3.02482	4.10952	6.22233	0.70196
ODF3	1.06987	0.828407	2.40667	0.581853
GJA8	2.43458	2.27471	1.41339	2.05947
ODF4	0.432812	1.37667	2.04343	0.922548
POTEH	0.0463195	0.0894918	0.12125	0.136459
SPO11	25.6878	19.9749	18.2436	19.5247
MAGEB5	0.324417	0.549319	0.301091	0.271743
SSX4	0.302767	0.615675	0.240054	0.368084
SSX4B	0.00880001	0.274699	0.232491	0.364419
POTEA	0.526405	0.701998	0.257751	1.49479
CT45A3	0.426367	0.846179	0.23586	0.151714
SPANXN4	0.134248	0.371977	0.825353	0.404434
FAM46D	3.82298	2.5328	6.35865	4.8452
SPANXN5	3.12089	2.37982	2.91621	5.27308
CPXCR1	0.0232586	0.050159	0.0166139	0.00959308
POTED	0.218272	0.217118	0.286433	0.0841885
MAGEA2B	0.951199	0.205571	0.154991	0.139172
POTEG	0.0147153	0.0100348	0.0198258	1.53674
MAGEB3	12.0606	7.38428	8.99852	6.79722
SPANXN1	3.60078	4.02682	2.96129	3.14407
SPANXA2	0.125445	1.71539	1.04154	0.137248
CTAGE1	1.63248	2.8068	2.63514	0.955931
GAGE12G	0.0799223	0.178186	1.91308	0.194735
CT47A6	0.741859	1.58671	0.793023	0.101645
CT47A12	6.39741	16.3797	31.5072	13.9489
CT47A7	0.00234363	0.0245401	0.0186151	0.0057625
POTEB	4.97632	1.97397	4.76075	3.87325
CT47A1	0.0293296	0.143519	0.105618	0.117858
SSX2	0.0136526	0.0185509	0.0154448	0.0286926
SSX2B	0.375176	1.04398	0.532978	1.30678
MAGEA2	2.9848	3.15187	1.19264	1.76741
SPANXN2	0.0290828	0.181938	0.644338	0.156983
NXF2	0.0367519	0.141888	0.0239226	0.0183563
NXF2B	0.0332993	0.0264869	0.00457623	0.090627
CT45A9	0.00842387	0.0102043	0.109388	0.0110067
CT45A2	0.00868072	0.000329852	0.000684398	0.00222404
CT45A7	0.423436	0.376446	0.312875	0.317127
	7.26438	4.84462	9.36206	11.5919
	0.960595	0.498275	0.270571	0.318511
	0.121818	0.0489242	0.00916094	0.0143238
	38.1198	39.97	34.6149	32.5838
	0.017045	0.0550779	0.205268	0.165603
	0.820652	0.52555	1.2981	0.303556
	0.230162	0.441919	0.309317	0.0491282
	0.0774896	0.0474755	0.146482	0.0840787
	0.0547732	0.06117	0.0705135	0.0314782
	0.0217956	0.00988822	0.0204668	0.033116
	0.00415858	0.00606692	0.0875841	0.0373612
	0.0706052	0.0323185	0.00454735	0.0302916
	0.0101903	0.0184861	0.134516	0.0185567
	0.24294	0.243244	0.0721723	0.169976
	0.169854	0.106032	0.165109	0.167211
	0.0137511	0.0197814	0.00442554	0.0209497
	1.11891	0.942538	1.25285	1.27861
	0.211789	1.5794	0.942969	0.282798
	0.186776	0.37927	0.211961	0.338148
	0.0345616	0.185232	0.764307	0.500435
	0.169812	0.00121557	0.00132794	0.0143073
	0.00185811	0.00716889	0.0118768	0.0284994
	0.412926	0.017413	0.0679011	0.0287175
	0.191063	1.04246	0.454855	0.296961
	0.000734383	0.00109563	0.00190355	0.0298041
	0.0409037	0.0100754	0.0117076	0.0372694
	0.019638	0.0887325	0.0424218	0.0846552
	0.0987909	0.205782	3.60565	0.444046
	8.28151	7.35684	20.6143	3.8059
	112.212	114.295	136.634	66.0487
	0.633798	1.98658	1.99458	1.22623
	0.721078	1.37129	0.849542	0.901628
	16.2997	14.4414	14.5031	6.11635
	0.0467394	0.0202879	0.0607551	0.379482
	0.0011758	0.000927802	0.00139665	0.0168369
	0.00255496	0.00252696	0.0094568	0.0130399
	0.0831069	0.0581894	0.0622003	0.0641458
	0.275303	0.646428	1.32273	0.730446
	0.016019	0.0166538	0.00623856	0.0246404
	0.00139061	0.00435929	0.00334998	0.0151849
	0.0303211	0.160885	0.186043	0.0440507
	2.11926	4.54865	11.889	5.56455
	0.261964	0.180161	0.397583	0.829565
	2.94686	2.46191	2.07161	2.78728
	0.0200017	0.00292814	0.0129167	0.00021156
	0.0320956	0.00387985	0.0162842	0.0227011
	0.243524	0.335937	0.307976	0.0427452
	1.40712	2.11971	8.63752	2.20578
	2.68572	1.93014	1.92015	1.92981
	0.0986166	0.00338887	0.0154526	0.0279719
	0.00341727	0.00212172	0.00889064	0.0111426
	20.1495	23.6866	21.8084	17.795
	1.29657	3.83105	6.22031	6.63282
	0.00565443	0.00394093	0.00315361	0.0117703
	0.00262974	0.000902718	0.00149371	0.00156901
	2.47194	7.99896	3.55459	7.40499
	0.849414	0.419408	0.53684	0.458841
	0.00904504	0.00349544	0.00596021	0.00353723
	0.0023192	0.0856773	0.0112246	0.0320399
	0.00784534	0.119422	0.0141386	0.0227639
	0.0141602	0.0747972	0.0767635	0.0299556
	0.035857	0.0805226	0.163776	0.0911416
	0.311848	0.725019	1.30271	0.396133
	0.00464281	0.0084465	0.00583561	0.0295529
	1.00022	2.94586	4.71604	3.95514
	0.103709	0.132888	0.379678	0.21583
	0	0	0	0.00025521
	2.48695	5.9247	13.5609	8.21747
	0.00136746	0.000819269	0.00337387	0.0118328
	0	0	0	0
	0	1.69868e-05	0	0.000380339
	0	0	0	0
	0	0	0	0
	0	0	0	0
	2.13765	1.88802	1.65909	0.259143
	0	0	0	0
	0.00502619	0.00932814	0.0671505	0.0790913
	0	0.0105804	0.0460417	0.00493652
	0	0	0	2.52241e-05
	0	0	0	0
	0.000150576	9.08801e-05	4.23405e-05	0.000351302
	0	0	0	0
	0	0	0	0
	0	0	3.18655e-05	0.000107236
	6.37116e-05	0.00630136	0.0690169	0.0374217
	0.000926239	0.0177098	0.00374668	0.00663374
	0	0	0	0
	0.00244125	0.00195216	0.00306555	0.0102389
	0.0405333	0.043626	0.0748756	0.0531469
	0	0	0	0
	8.38687e-05	0.0186307	0.21206	0.0838753
	0.168312	0.317505	0.165455	0.190898
	0.0729122	0.180828	1.36481	0.361898
	0.000438554	0.000688989	0.000645768	0.0183733
	0.00126787	0.00185579	0.00132556	0.00734562
	0.00259613	0.00933898	0.0238288	0.0488308
	0.00116946	0.00320275	0.0105904	0.0418706
	0.178661	0.447668	1.04302	0.590624
	0.380135	0.767864	2.10205	1.43902
	0.137267	0.226508	1.62887	0.778812
	0.0005999	0.00336605	0.000905111	0.00256439
	0.0379122	0.0348827	0.0400943	0.0505126
	0.00398362	0.00656751	0.0486985	0.0184948
	0.000201588	0.00028747	0.00111088	0.00556102
	0.000123486	0.00184258	0.00130992	0.00343521
	0.102299	0.23128	1.67069	0.394934
	0.00141938	0.00199253	0.00162444	0.0203018
	2.35518e-05	0.000144639	0.000409856	0.000257715
	0	0	0	0
	0	0	5.02896e-05	0.000139353
	0.0152636	0.0379186	0.0423791	0.0434517
	0	0	0	0
	3.20852e-05	0	3.51275e-05	5.54977e-05
	0.062476	0.314298	0.676337	0.604595

## Sheet: TDA
Gene	nTPM	1599	1602	1603
PMEL (GP100)	0.7	0.1	1.7	0.3
MLANA (MART-1)	0.1	0	0.5	0
CEACAM1	2.4	1.9	1.7	3.5
CEACAM3	0.6	0.7	0.8	0.4
CEACAM4	0.3	0.2	0.2	0.5
CEACAM5	0.2	0.3	0.3	0.1
CEACAM6	2.2	1.8	2.1	2.6
CEACAM7	0	0.1	0	0
CEACAM8	1.8	1.8	0.9	2.7
RAB38 (NY-MEL-1)	3.5	2.1	2.9	5.5
ANKRD30A (NY-BR-1)	0	0	0	0
GPR143 (OA1)	1.8	0.8	1.2	3.5
ACP3 (PAP)	1	1	1	1
KLK3 (PSA)	0	0.1	0	0
TYRP1 (TRP1)	0	0	0.1	0
DCT (TRP2)	0.5	0.3	1	0.2
TYR (Tyrosinase)	0	0	0.1	0

## Sheet: TOA
Gene	nTPM	1599	1602	1603
AFP	0	0.1	0	0
CALCA	0.3	0.3	0.2	0.3
EZH2	43.4	54.2	51.1	25
GPC3	8.1	7.3	7.5	9.6
HPN (Hepsin)	0.2	0.3	0	0.2
ERBB2 (HER2)	7.5	8.3	5.6	8.6
EGFR	12.9	9.6	8.4	20.7
TP53	47.6	53.2	51.1	38.6
BIRC5 (Survivin)	41.3	40.4	62	21.6
KLK4 (Kallikrein-4)	0.1	0.1	0.1	0.2
KIF20A	24.8	25.8	37.4	11.2
MDK (Midkine)	93.7	73	84.7	123.5
MUC1	1.2	1	1	1.5
PRAME	0.2	0.5	0.2	0
FOLH1 (PSMA)	0.1	0	0	0.1
MOK (RAGE-1)	1.7	1.2	2.3	1.6
STEAP1	0.9	0.4	1	1.2
TERT (Telomerase)	0.1	0.1	0.1	0
WT1	0	0	0	0.1

## Sheet: TSP
Tissue specificity gene
		Tissue specificity	gene symbol	Name/Function	Average nTPM	Max Scaled Tags Per Million
	Mammay land	Secretoglobin family 2A member 2	SCGB2A2	Mammaglobin	2.1	1.3
		Casein alpha s1	CSN1S1	Casein	0.4	0.3
		Casein beta	CSN2	Casein	2.9	N.A.
	Adipose tissue	Adipogenesis regulatory factor	ADIRF		26	29.4
	Liver	Syndecan1	SDC1	Membrane protein	5.1	7.4
		UDP glucuronosyltransferase family 1 member A4	UGT1A4	UDP-glucuronosyl-transferase	0	0
		Arylacetamide deacetylase	AADAC	Esterase	0.4	0.1
		Fibrinogen gamma chain	FGG	Fibrinogen	0.3	0.4
		Fibrinogen beta chain	FGB	Fibrinogen	0.3	0.3
		Apolipoprotein A1	APOA1	Apolipoprotein	0.9	0.1
		Phosphoenolpyruvate carboxykinase 2	PCK2	PEP-carboxykinase	3.7	6.9
		Apolipoprotein C3	APOC3	Apolipoprotein	0.5	0.2
		Serpin family A member 5	SERPINA5	Antitrypsin	0.9	N.A.
		Dihydropyrimidinase	DPYS	Dihydropyrimidinase	5.2	0.7
		UDP glucuronosyltransferase family 2 member B10	UGT2B10	UDP-glucuronosyl-transferase	0	0
	Muscle	Actin alpha cardiac muscle 1	ACTC	Alpha actin	11.4	4.8
		Myosin heavy chain 7	MYH7	Myosin	0.1	0.3
		Myosin light chain 1	MYL1	Myosin	7.4	2.2
		Myosin light chain 2	MYL2	Myosin	1	0.4
		Adenylate kinase 1	AK1	Adenylate kinase	4	1.2
		Cholinergic receptor nicotinic alpha 1 subunit	CHRNA1	Acetylcholine receptor	1.2	1.9
		Cysteine and glycine rich protein 3	CSRP3	Heart-LIM protein	0.1	0
		Enolase 3	ENO3	Enolase	5.8	9.1
		Myoglobin	MB	Myoglobin	0.8	0.1
		Troponin C1, slow skeletal and cardiac type	TNNC1	Troponin	4.4	0.7
		Troponin I1, slow skeletal type	TNNI1	Troponin	1.6	1.7
		Troponin T2, cardiac type	TNNT2	Troponin	2.1	1.2
		Titin	TTN	Myofilament	0.7	3.5
	Nervous system	Glutamate decarboxylase 1	GAD1	Glutamate-decarboxylase	0.8	1.1
		ADAM metallopeptidase domain 23	ADAM23	Metalloproteinase	5	9.1
		Calcium dependent secretion activator	CADPS	Calcium-binding protein	0.6	0
		Calbindin 1	CALB1	Calbindin	2.7	2.7
		Cholecystokinin	CCK	Prohormone	0.2	1.2
		Chromogranin B	CHGB	Secretogranin	4	1.8
		Cannabinoid receptor 1	CNR1	Receptor	1.3	1.1
		Fibroblast growth factor 1	FGF1	Growth factor	1.5	1.6
		Gamma-aminobutyric acid type B receptor subunit 1	GABBR1	Receptor	0.2	3.9
		Gamma-aminobutyric acid type A receptor subunit alpha5	GABRA5	GABA receptor	9.1	9.1
		Galanin and GMAP prepropeptide	GAL	Galanin	0.7	2.2
		G protein-coupled receptor 37	GPR37	G protein–linked receptor	0.03	0.1
		Kalirin RhoGEF kinase	KALRN	Vesicle transport	0.5	0.1
		Potassium two pore domain channel subfamily K member 1	KCNK1	Potassium channel	0.5	0.4
		Neurofilament medium	NEF3	Neurofilament	1.7	0.2
		Peptidyl arginine deiminase 2	PADI2	Deiminase	2.2	8.9
		Protocadherin 8	PCDH8	Protocadherin	0.033	0.3
		Serine protease 12	PRSS12	Neurotrypsin	1	0.6
		Somatostatin	SST	Somatostatin	1.2	2.7
		Synaptic vesicle glycoprotein 2B	SV2B	Synaptic vesicle protein	0.6	2.9
		Synaptogyrin 1	SYNGR1	Synaptogyrin	3.5	6.5
		Synaptotagmin 1	SYT1	Synaptotagmin	0.5	0.4
		Tachykinin precursor 1	TAC1	Neuropeptide	0.2	0.1
		Calcium binding protein 1	CABP1	Ion transport	0.2	0.1
	Kidney	Amine oxidase copper containing 1	AOC1(ABP1)	Membrane glycoprotein	2.1	4.2
		Secreted phosphoprotein 1	SPP1	Osteopontin	8.5	20.8
	Retina	G protein-coupled receptor 137B	TM7SF1	Transmembrane protein	6.3	25.1
	Pancreas	Amylase alpha 2B	AMY2B	Amylase	12.7	0
		Chymotrypsin like elastase 3A	ELA3A	Elastase	0.3	0.1
		Glucagon	GCG	Glucagon	0.4	0.3
		Left-right determination factor 1	LEFTB	L/R determination factor B	0	0.1
		Serine protease 2	PRSS2	Trypsin II	0.9	11.4
		Serine protease 3	PRSS3	Trypsin III	0.8	1.6
		Ribonuclease A family member 1	RNASE1	RNase A1	179.2	158
		Secretagogin	SCGN	Secretagogin	0.4	0.6
	Placenta	Chorionic somatomammotropin hormone 2	CSH2	Placental lactogen hormone	1	0
		Proteoglycan 2	PRG2	Proteoglycan	8.8	12.6
	Prostate	Secretory leukocyte peptidase inhibitor	SLPI	Protease inhibitor	48.1	58.7
		Acid phosphatase 3	ACPP	Phosphatase	1	5.5
		Mucin 4	MUC4	Mucin	0	1.9
	Respiratory tract	Tetraspanin 1	TSPAN-1	Transmembrane protein	2	0.1
	Thyroid	Claudin 3	CLDN3	Tight junction protein	1.1	11.6
	Salivary gland	Proline rich protein BstNI subfamily 2	PRB2	Secreted protein	0	0
	Testis	Glutathione S-transferase mu 3	GSTM3	Glutathione transferase	13.3	2.9
	lung	Secretoglobin family 1A member 1	SCGB1A1	Uteroglobin	2.8	3.3
	brain	Semaphorin 3B	SEMA3B	Semaphorin	0.6	0.1
		Glycoprotein hormones, alpha polypeptide	CGA	Glycoprotein hormone	0.8	1.1
	Ciliated cells	Sperm associated antigen 6	SPAG6	Sperm antigen	0.4	0.1
	esophagus, urinary bladde	Claudin 4	CLDN4	Tight junction protein	10.8	14.9
					The median value：1

## Sheet: CTA
Gene	nTPM	1599	1602	1603
ADAM2	0	0	0	0
AKAP4	0	0	0	0
CAGE1	0	0	0	0
CALR3	0.1	0.4	0.1	0
CPXCR1	0	0	0	0
CSAG2	0.1	0	0	0.2
CSAG3	0.1	0.2	0	0.2
CT45A2	0	0	0	0
CT45A3	0	0	0	0
CT45A5	0	0	0	0
CT45A7	0	0	0	0
CT45A9	0	0	0	0
CT47A1	0	0	0	0
CT47A12	0	0	0	0
CT47A6	0	0	0	0
CT47A7	0	0	0	0
CT47B1	0	0	0	0
CT83	0	0	0	0
CTAG1A	0	0	0	0
CTAG1B	0	0	0	0
CTAGE1	0	0	0	0
CTCFL	0.1	0.2	0.1	0
DDX53	0	0	0	0
DPPA2	0.1	0.1	0.3	0
FAM46D	0	0	0	0
FMR1NB	0	0	0	0
FTHL17	0	0	0	0
GAGE1	0	0	0	0
GAGE12G	0	0	0	0
GAGE2A	0	0	0	0
GJA8	0	0	0	0
GOLGA6L2	0	0	0	0
LUZP4	0	0	0	0
MAGEA1	0	0	0	0
MAGEA10	0	0	0	0
MAGEA11	0	0	0	0
MAGEA2	0	0	0	0
MAGEA2B	0	0	0	0
MAGEA3	0	0	0	0
MAGEA4	0	0	0	0
MAGEA6	0	0	0	0
MAGEA9	0	0	0	0
MAGEA9B	0	0	0	0
MAGEB1	0	0	0	0
MAGEB2	0	0	0	0
MAGEB3	0	0	0	0
MAGEB4	0	0	0	0
MAGEB5	0	0	0	0
MAGEB6	0	0	0	0
MAGEC1	0	0	0	0
MAGEC2	0	0	0	0
NXF2	0	0	0	0
NXF2B	0	0	0	0
ODF3	0	0	0	0
ODF4	0	0	0	0
PAGE5	0.1	0.2	0.2	0.1
PASD1	0	0	0	0
PLAC1	0	0.1	0	0
POTEA	0	0	0	0
POTEB	0	0	0	0
POTEC	0	0	0	0
POTED	0	0	0	0
POTEE	0	0	0	0
POTEG	0	0	0	0
POTEH	0	0	0	0
RHOXF2	0	0	0	0
SLCO6A1	0	0	0	0
SPANXA1	0	0	0	0
SPANXA2	0	0	0	0
SPANXB1	0	0	0	0
SPANXC	0	0	0	0
SPANXD	0	0	0	0
SPANXN1	0	0	0	0
SPANXN2	0	0	0	0
SPANXN3	0	0	0	0.1
SPANXN4	0	0	0	0
SPANXN5	0	0	0	0
SPO11	0	0	0	0
SSX1	0	0	0	0
SSX2	0	0	0	0
SSX2B	0	0	0	0
SSX3	0	0	0	0
SSX4	0	0	0	0
SSX4B	0	0	0	0
TFDP3	0	0	0	0
TPTE	0	0	0	0
TSPY1	0	0	0	0
TSPY10	0	0	0	0
TSPY3	0	0	0	0
XAGE1A	0	0	0	0
XAGE1B	0.1	0	0.2	0
XAGE3	0	0	0	0

[truncated: 2 more sheets: ADA, mouse CTAs]
